# Supplementary material for: Gene gain facilitated endosymbiotic evolution of Chlamydiae
Source: PubMed Central journal article supplement (PMC9816063; doi:10.1038/s41564-022-01284-9), 2023-01-05

## Supplementary Data S6 – Phylogenetic trees

|                                                               |              |
|---------------------------------------------------------------|--------------|
| <b>PVC BACTERIA SPECIES PHYLOGENIES (SEE DATA S5)</b> .....   | <b>3-62</b>  |
| <b>180 TAXA DATASET</b> .....                                 | <b>3-23</b>  |
| ML (PMSF) – 0% pruned .....                                   | 3            |
| ML (TBE) – 0% pruned .....                                    | 4            |
| Bayesian (Chain 1) – 0% pruned .....                          | 5            |
| Bayesian (Chain 2) – 0% pruned .....                          | 6            |
| Bayesian (Chain 3) – 0% pruned .....                          | 7            |
| Bayesian (Chain 4) – 0% pruned .....                          | 8            |
| Bayesian (Consensus of chains 1, 2, 3, & 4) – 0% pruned.....  | 9            |
| ML (PMSF) – 10% pruned .....                                  | 10           |
| ML (PMSF) – 20% pruned .....                                  | 11           |
| ML (PMSF) – 30% pruned .....                                  | 12           |
| ML (PMSF) – 40% pruned .....                                  | 13           |
| ML (PMSF) – 50% pruned .....                                  | 14           |
| ML (PMSF) – 51% pruned .....                                  | 15           |
| ML (TBE) – 51% pruned .....                                   | 16           |
| Bayesian (Chain 1) – 51% pruned .....                         | 17           |
| Bayesian (Chain 2) – 51% pruned .....                         | 18           |
| Bayesian (Chain 3) – 51% pruned .....                         | 19           |
| Bayesian (Chain 4) – 51% pruned .....                         | 20           |
| Bayesian (Consensus of chains 1, 2, 3, & 4) – 51% pruned..... | 21           |
| Bayesian (Consensus of chains 1 & 3) – 51% pruned .....       | 22           |
| Bayesian (Consensus of chains 2 & 4) – 51% pruned .....       | 23           |
| <b>183 TAXA DATASET</b> .....                                 | <b>24-43</b> |
| ML (PMSF) – 0% pruned .....                                   | 24           |
| ML (TBE) – 0% pruned .....                                    | 25           |
| Bayesian (Chain 1) – 0% pruned .....                          | 26           |
| Bayesian (Chain 2) – 0% pruned .....                          | 27           |
| Bayesian (Chain 3) – 0% pruned .....                          | 28           |
| Bayesian (Chain 4) – 0% pruned .....                          | 29           |
| Bayesian (Consensus of chains 1, 2, 3, & 4) – 0% pruned.....  | 30           |
| ML (PMSF) – 10% pruned .....                                  | 31           |
| ML (PMSF) – 20% pruned .....                                  | 32           |
| ML (PMSF) – 30% pruned .....                                  | 33           |
| ML (PMSF) – 40% pruned .....                                  | 34           |
| ML (PMSF) – 48% pruned .....                                  | 35           |
| ML (TBE) – 48% pruned .....                                   | 36           |
| Bayesian (Chain 1) – 48% pruned .....                         | 37           |
| Bayesian (Chain 2) – 48% pruned .....                         | 38           |
| Bayesian (Chain 3) – 48% pruned .....                         | 39           |
| Bayesian (Chain 4) – 48% pruned .....                         | 40           |
| Bayesian (Consensus of chains 1, 2, 3, & 4) – 48% pruned..... | 41           |
| Bayesian (Consensus of chains 2 & 4) – 48% pruned .....       | 42           |
| ML (PMSF) – 50% pruned .....                                  | 43           |
| <b>184 Taxa Dataset</b> .....                                 | <b>44-62</b> |
| ML (PMSF) – 0% pruned .....                                   | 44           |
| ML (TBE) – 0% pruned .....                                    | 45           |
| Bayesian (Chain 1) – 0% pruned .....                          | 46           |
| Bayesian (Chain 2) – 0% pruned .....                          | 47           |
| Bayesian (Chain 3) – 0% pruned .....                          | 48           |
| Bayesian (Chain 4) – 0% pruned .....                          | 49           |
| Bayesian (Consensus of chains 1, 2, 3, & 4) – 0% pruned.....  | 50           |

|                                                               |              |
|---------------------------------------------------------------|--------------|
| ML (PMSF) – 10% pruned .....                                  | 51           |
| ML (PMSF) – 20% pruned .....                                  | 52           |
| ML (PMSF) – 30% pruned .....                                  | 53           |
| ML (PMSF) – 40% pruned .....                                  | 54           |
| ML (PMSF) – 50% pruned .....                                  | 55           |
| ML (PMSF) – 51% pruned .....                                  | 56           |
| ML (TBE) – 51% pruned .....                                   | 57           |
| Bayesian (Chain 1) – 51% pruned .....                         | 58           |
| Bayesian (Chain 2) – 51% pruned .....                         | 59           |
| Bayesian (Chain 3) – 51% pruned .....                         | 60           |
| Bayesian (Chain 4) – 51% pruned .....                         | 61           |
| Bayesian (Consensus of chains 1, 2, 3, & 4) – 51% pruned..... | 62           |
| <b>ML SINGLE PROTEIN PHYLOGENIES .....</b>                    | <b>63-87</b> |
| <b>PROTON-DRIVEN ATP SYNTHASE.....</b>                        | <b>63-69</b> |
| AtpA (COG0056*) .....                                         | 63           |
| AtpB (COG0356).....                                           | 64           |
| AtpC (11YZG).....                                             | 65           |
| AtpD (COG0055) .....                                          | 66           |
| AtpE (0ZXI6).....                                             | 67           |
| AtpF (COG0711).....                                           | 68           |
| AtpH (COG0712).....                                           | 69           |
| <b>CYTOCHROME O UBIQUINOL OXIDASE.....</b>                    | <b>70-73</b> |
| CyoA (COG1622).....                                           | 70           |
| CyoB (COG0843).....                                           | 71           |
| CyoC (COG1845).....                                           | 72           |
| CyoD (COG3125).....                                           | 73           |
| <b>SODIUM TRANSPORTING NADH DEHYDROGENASE .....</b>           | <b>74-87</b> |
| NuoA (COG0838) .....                                          | 74           |
| NuoB (COG0377) .....                                          | 75           |
| NuoC (COG0852).....                                           | 76           |
| NuoD (COG0649).....                                           | 77           |
| NuoE (COG1905*).....                                          | 78           |
| NuoF (COG1894*).....                                          | 79           |
| NuoG (COG3383).....                                           | 80           |
| NuoH (COG1005).....                                           | 81           |
| NuoI (COG1143).....                                           | 82           |
| NuoJ (COG0839).....                                           | 83           |
| NuoK (COG0713).....                                           | 84           |
| NuoL (COG1009*) .....                                         | 85           |
| NuoM (COG1008).....                                           | 86           |
| NuoN (COG1007).....                                           | 87           |

\*NOG includes additional paralogous chlamydial sequences that form distinct clusters. Only the tree encoding the functional paralog of interest is shown, which in all cases here is the largest cluster of chlamydial sequences. Trees of other NOG clusters are in the repository.

\*\*Based on Pfam domains, chlamydial sequences mapped to the NOG including AtpG (COG0224) are a different paralog.

180taxa\_0perc\_pruned\_original

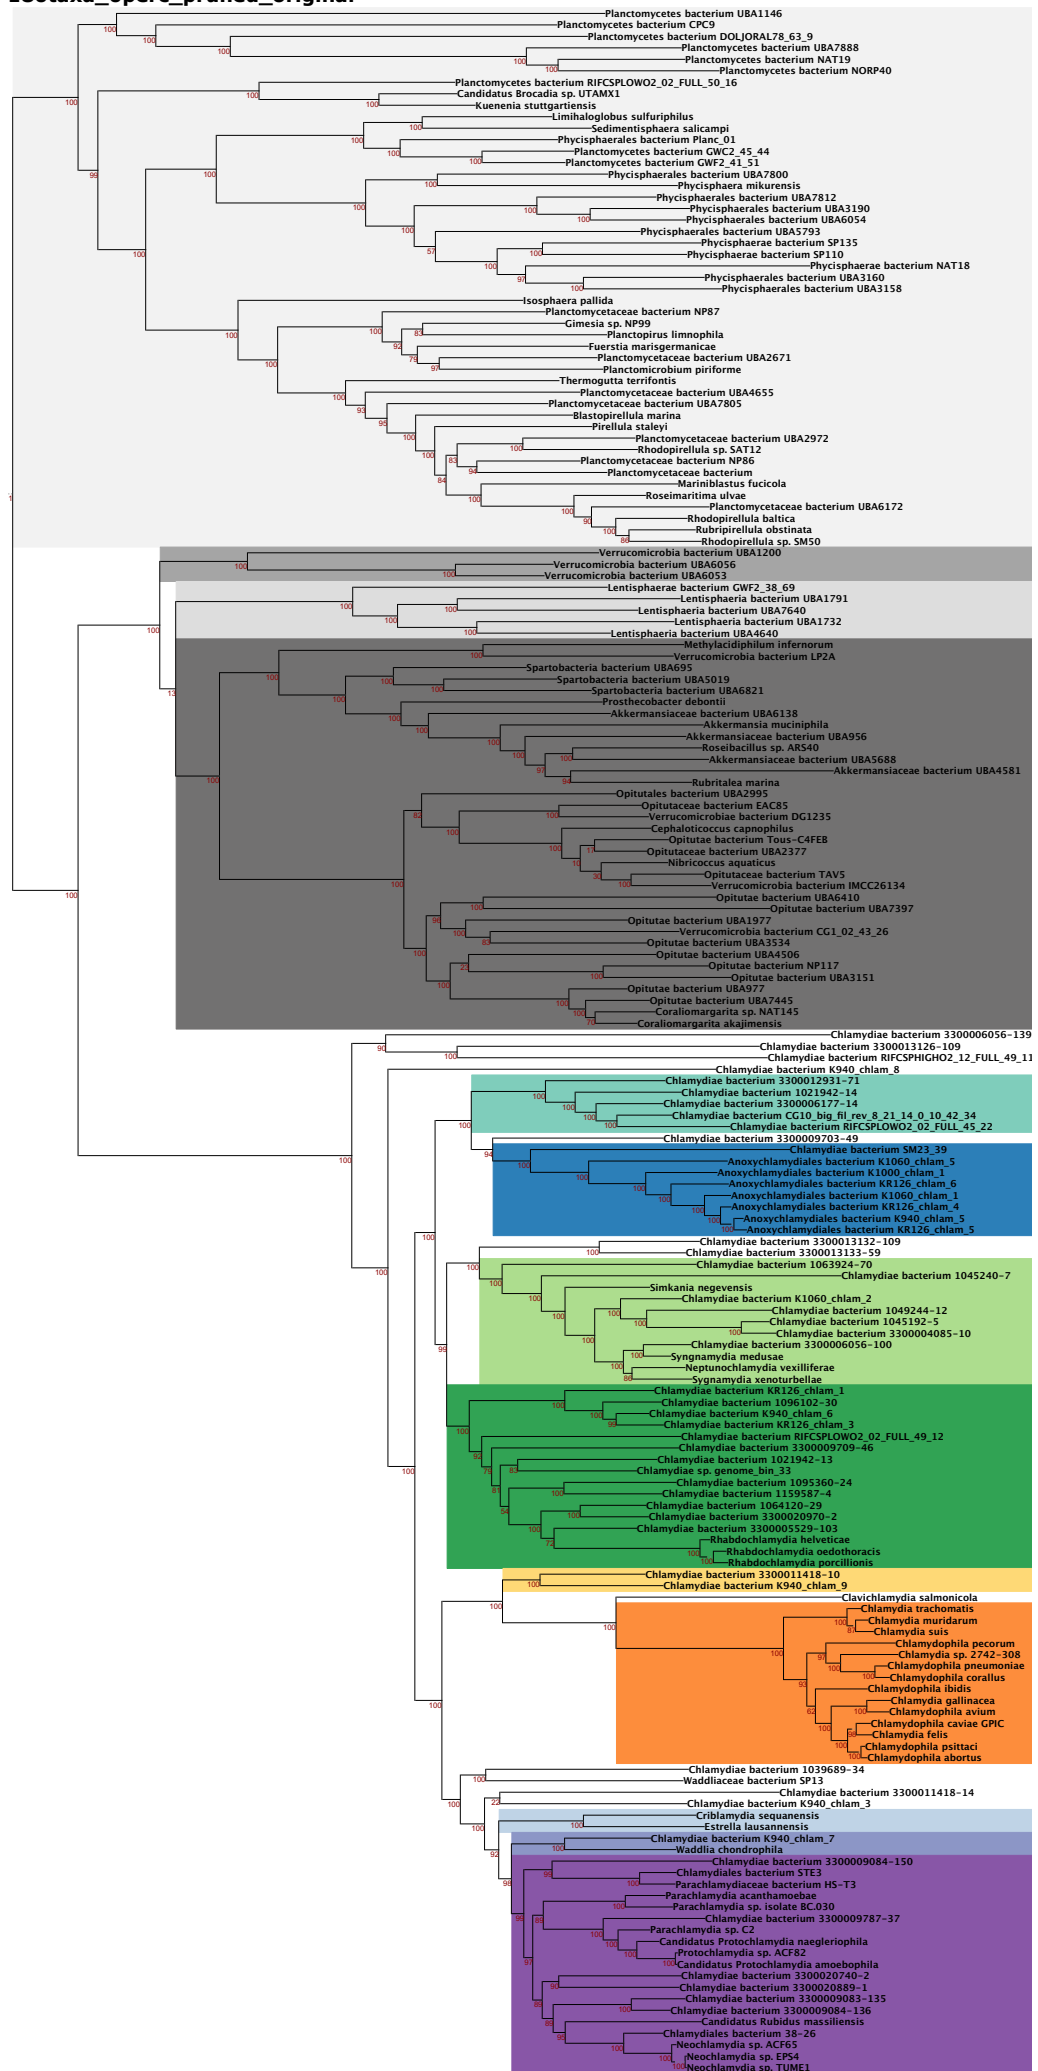

180taxa\_0perc\_pruned\_original

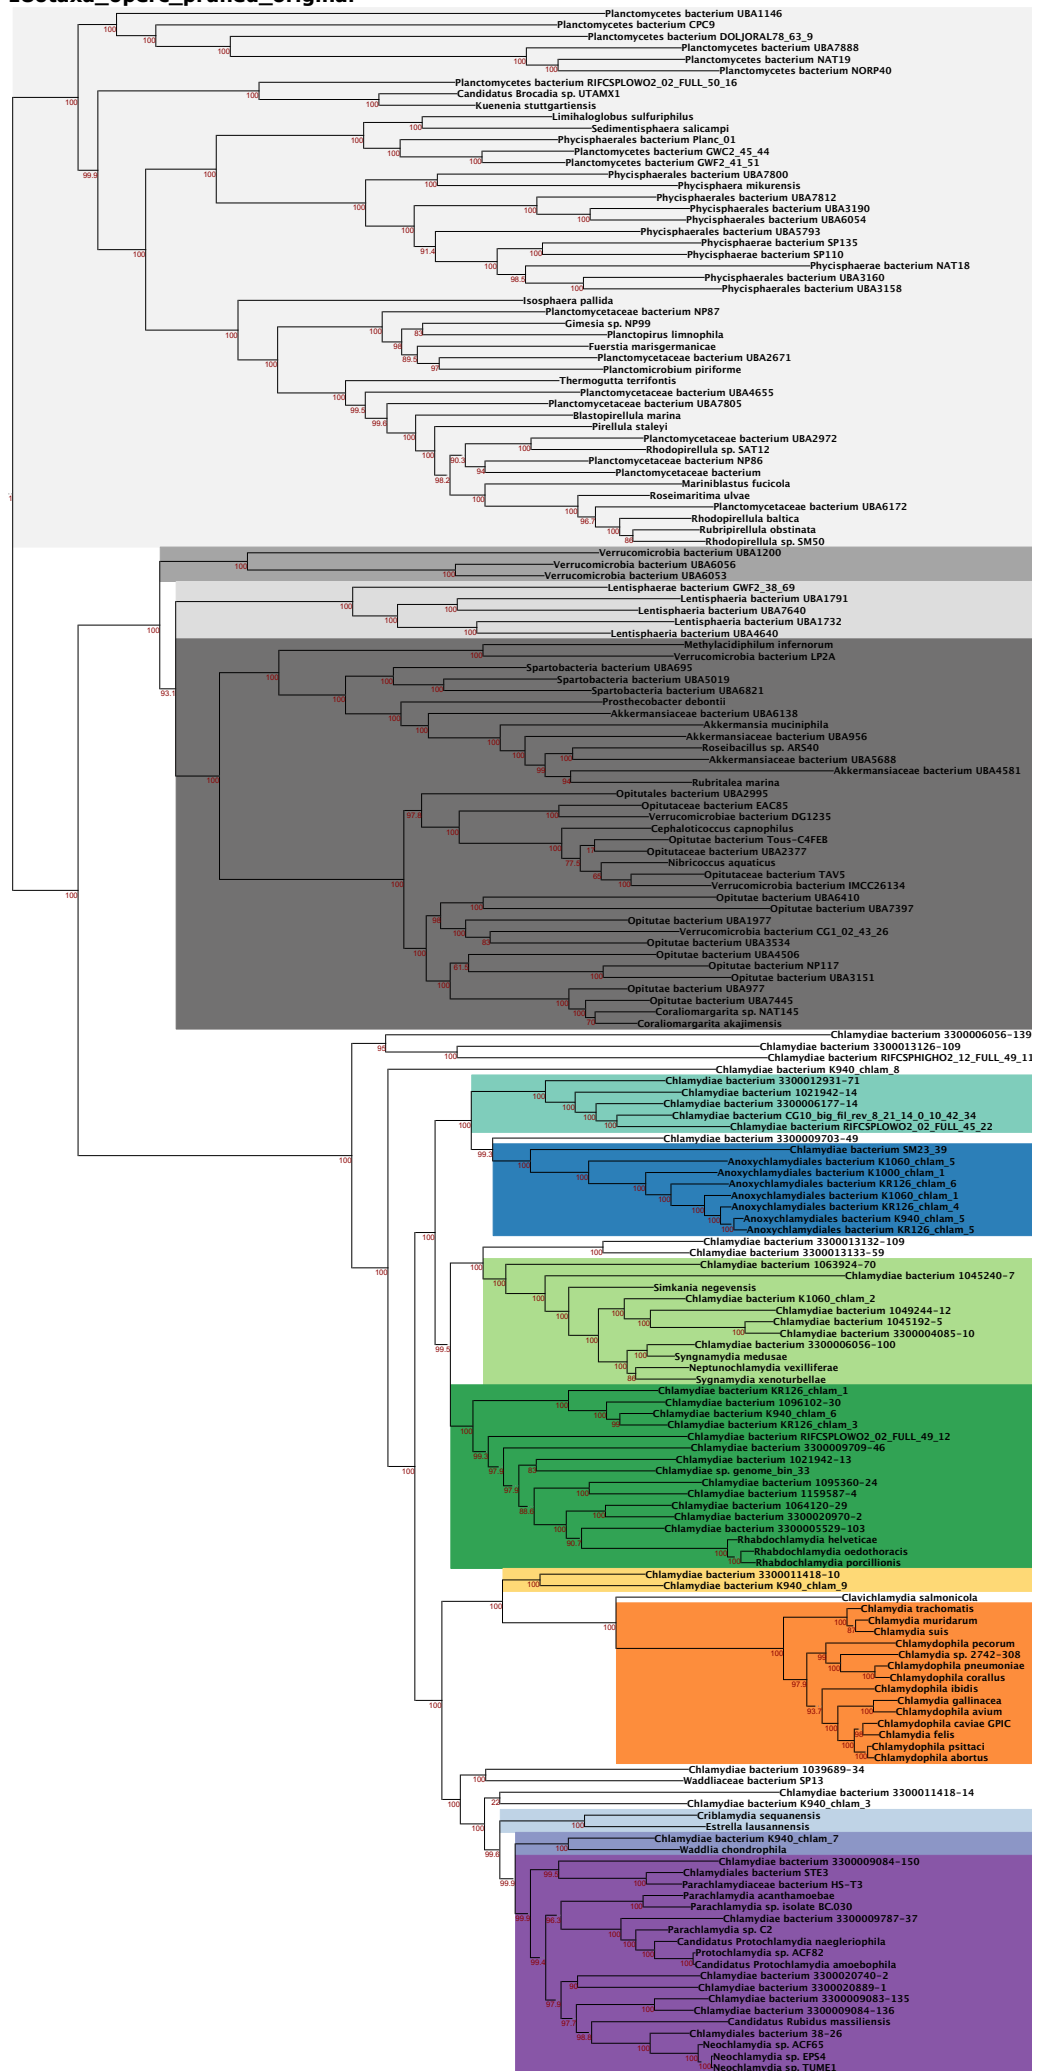

0.1



chain1

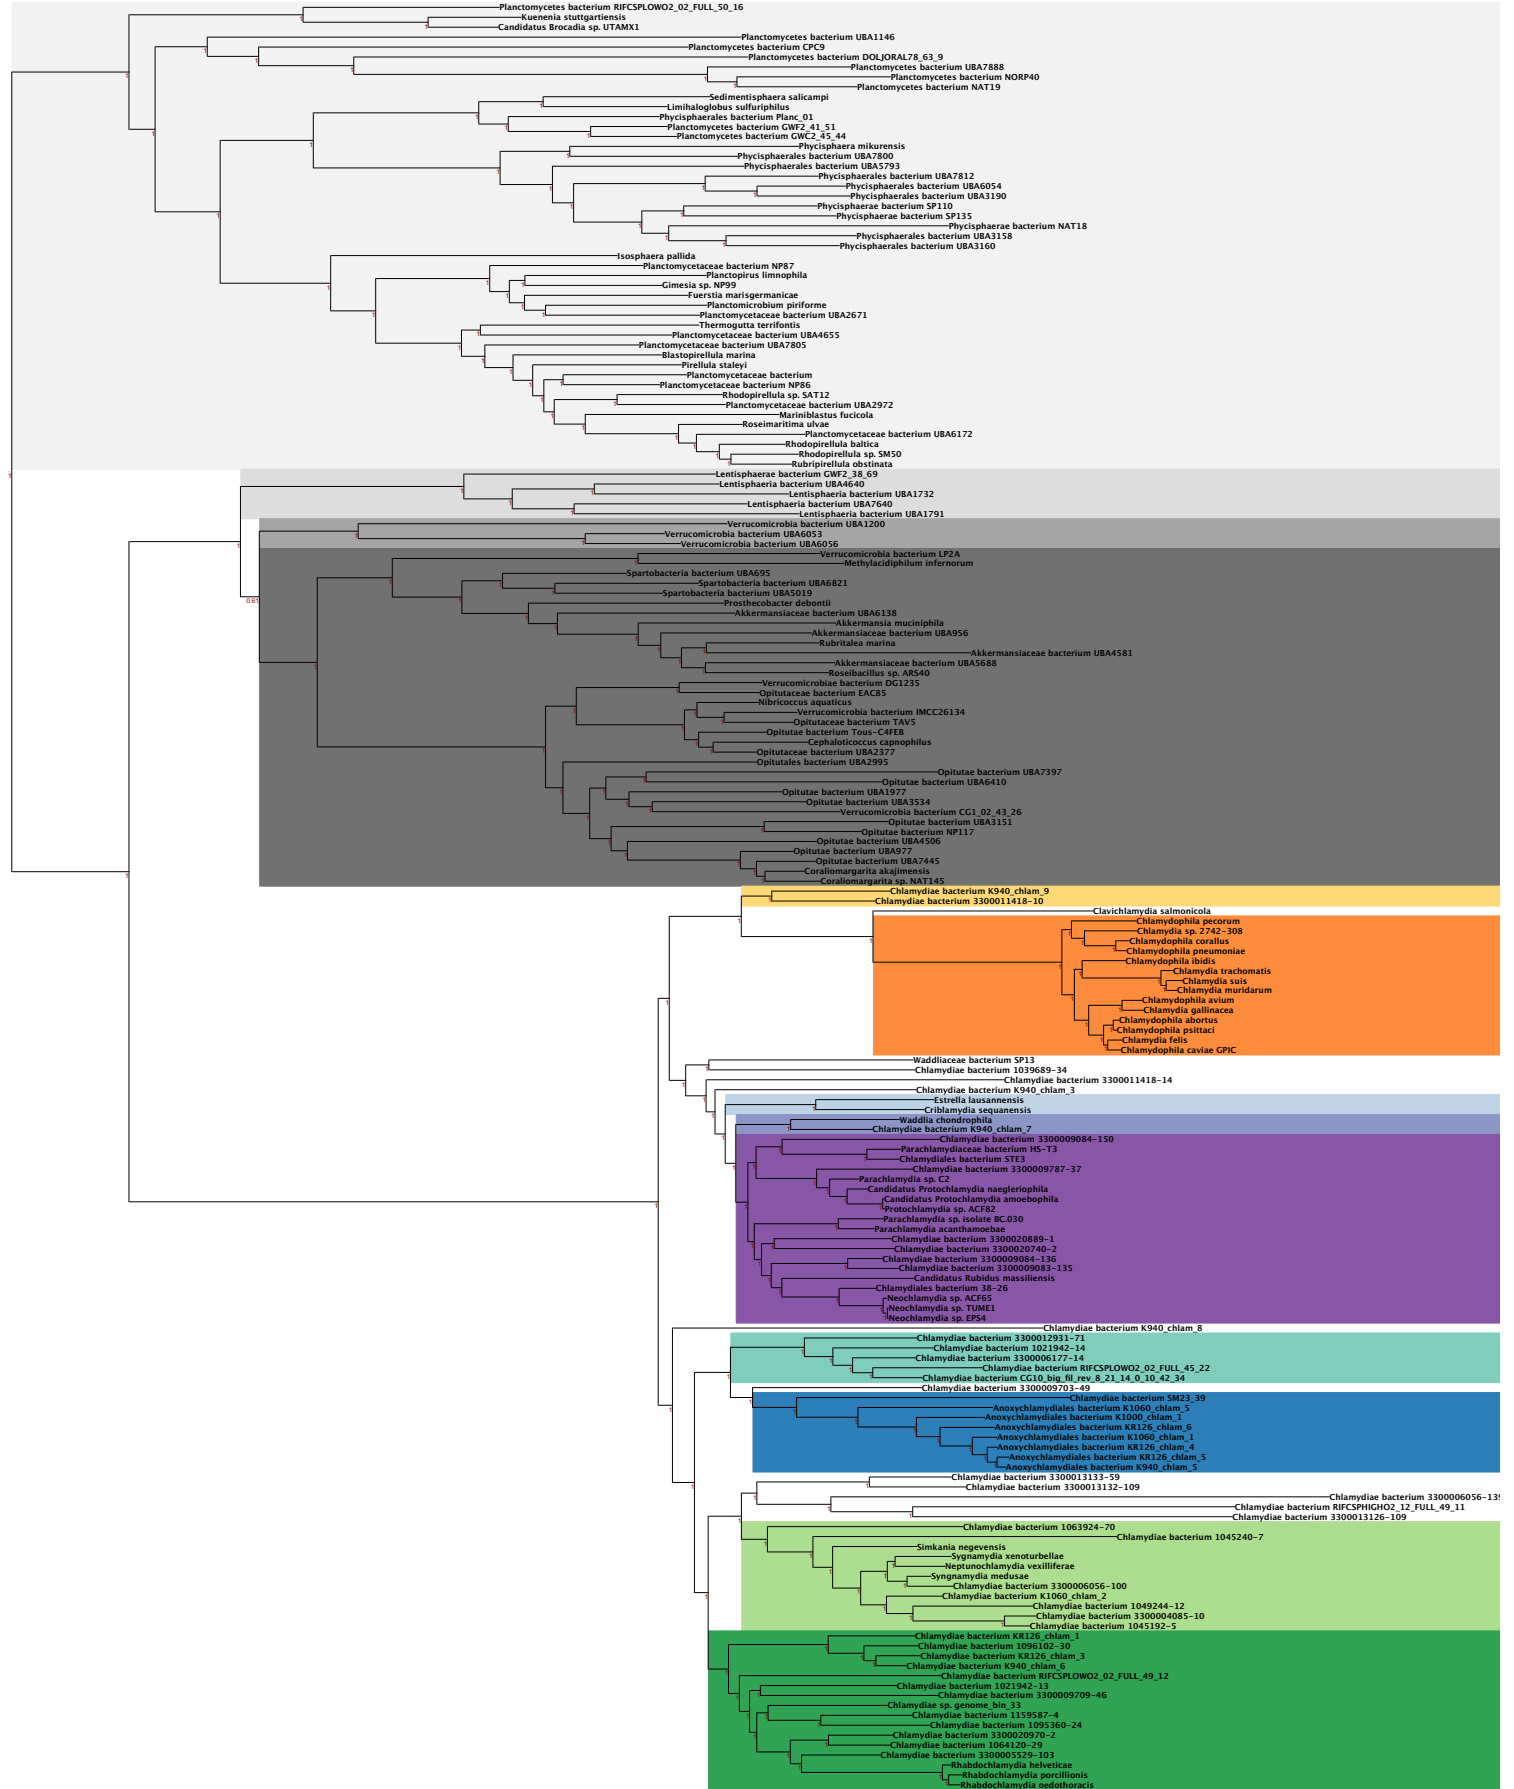

0.1

chain2

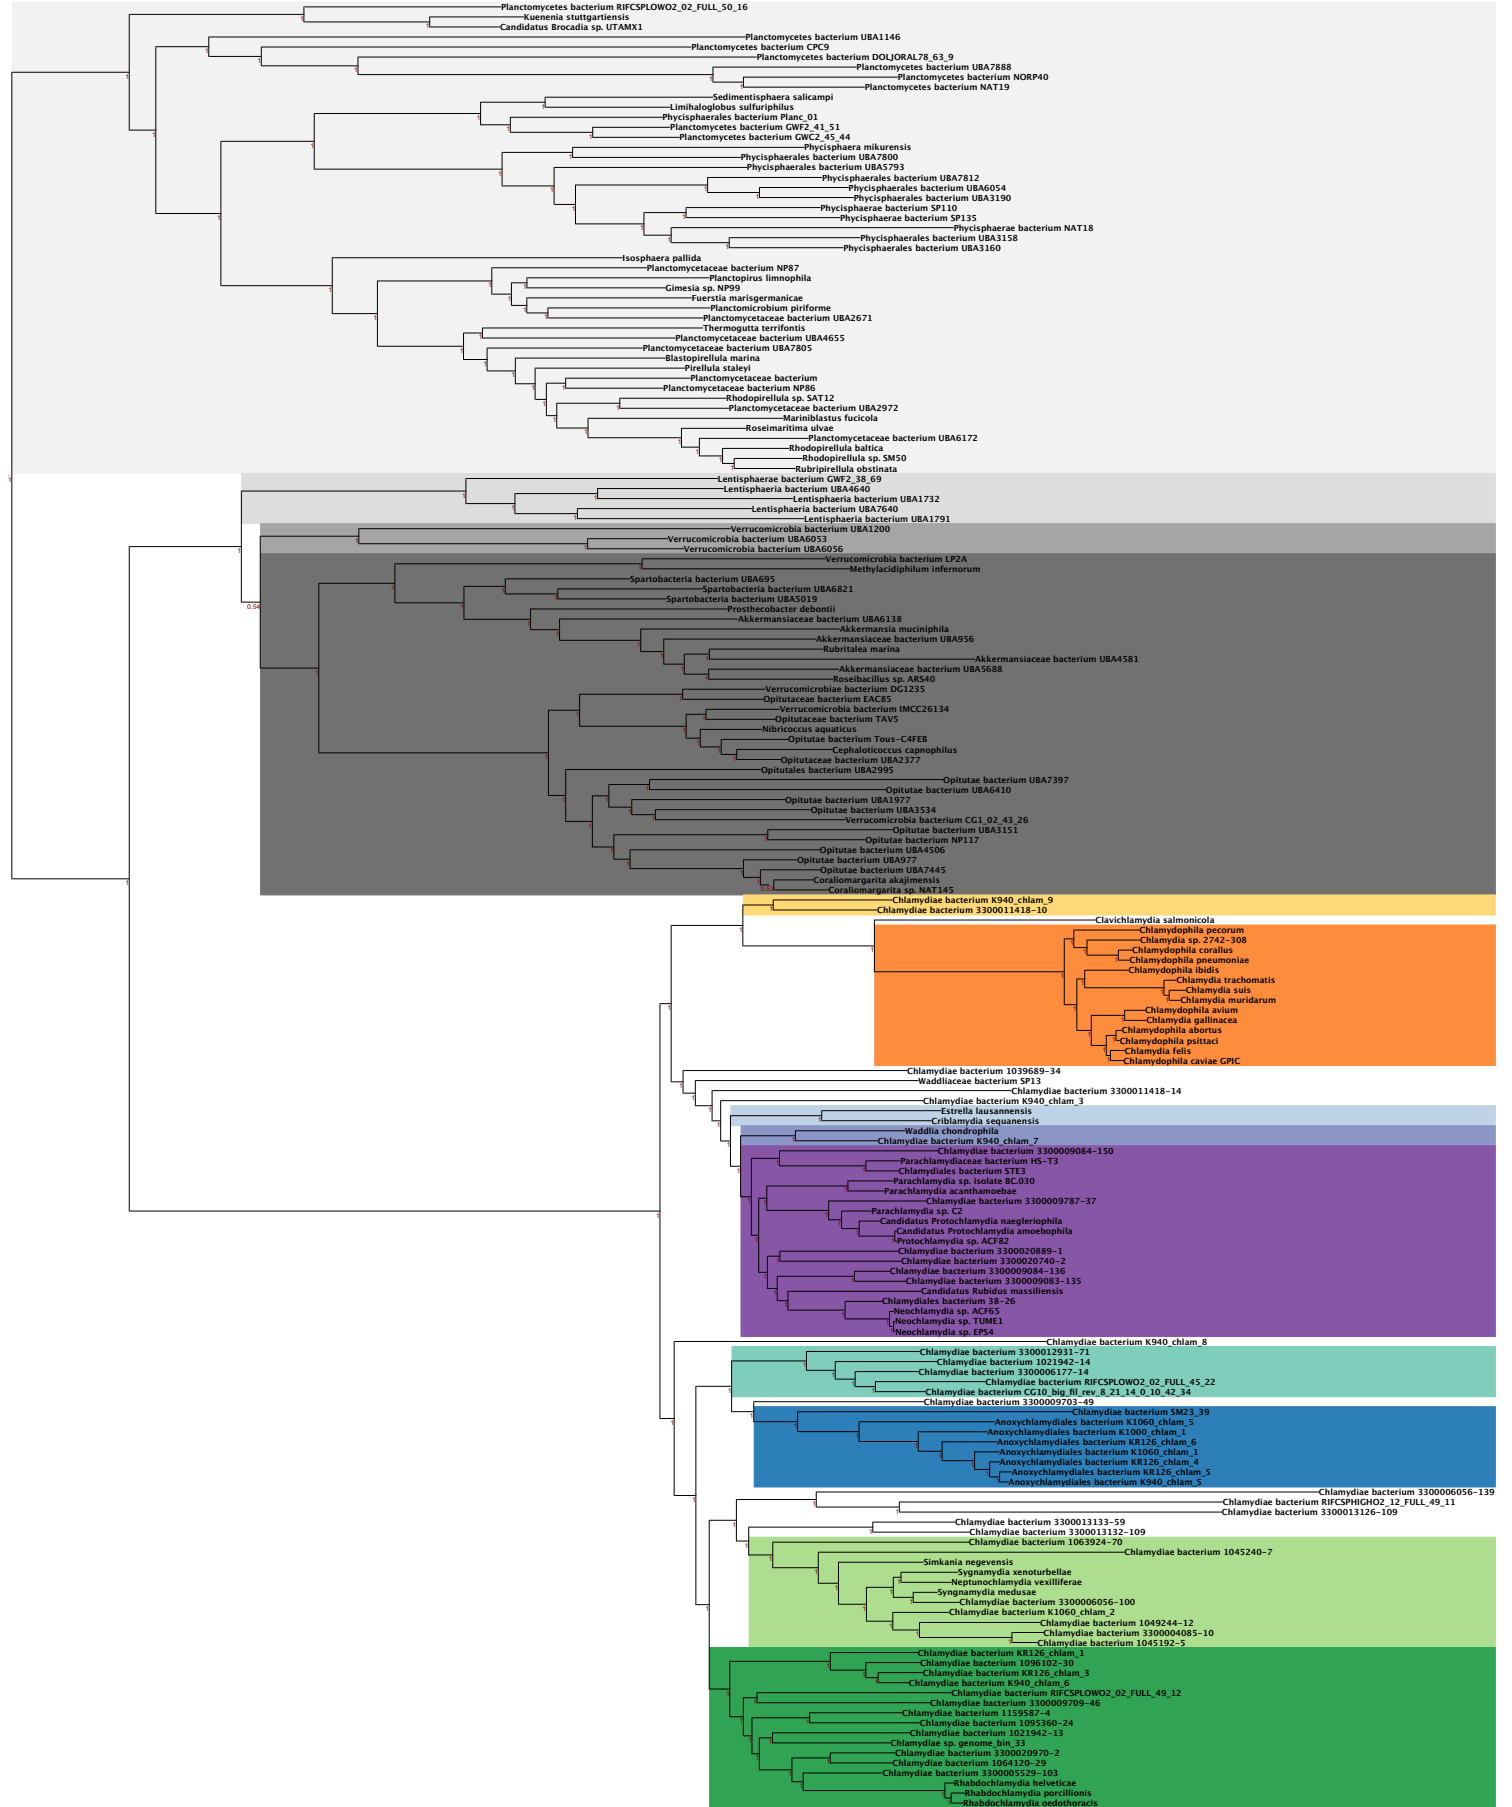

0.1





convergence\_chains\_1234

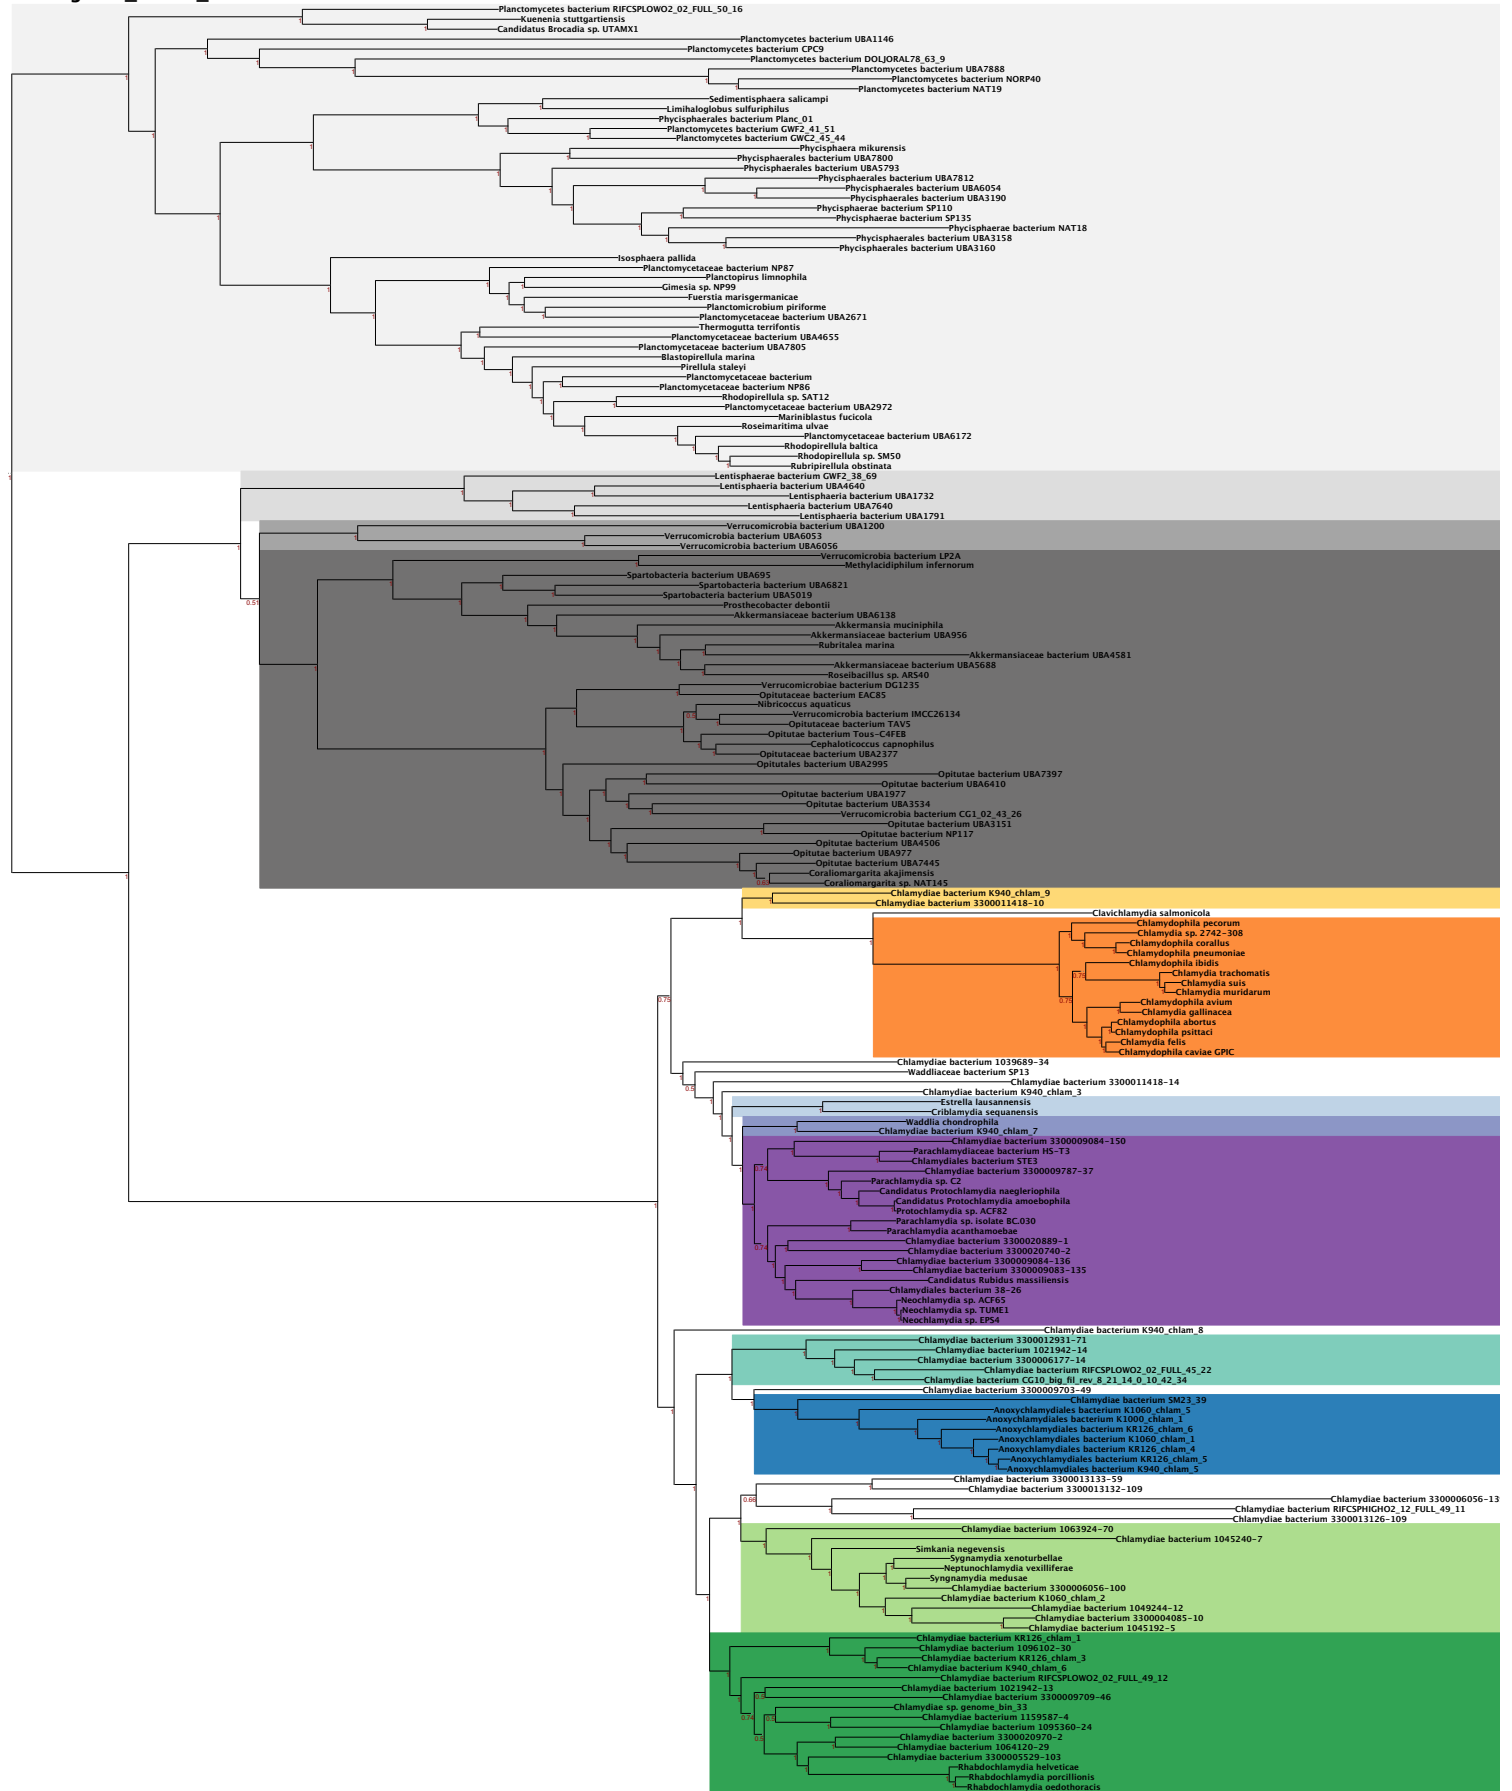



180taxa\_20perc\_pruned

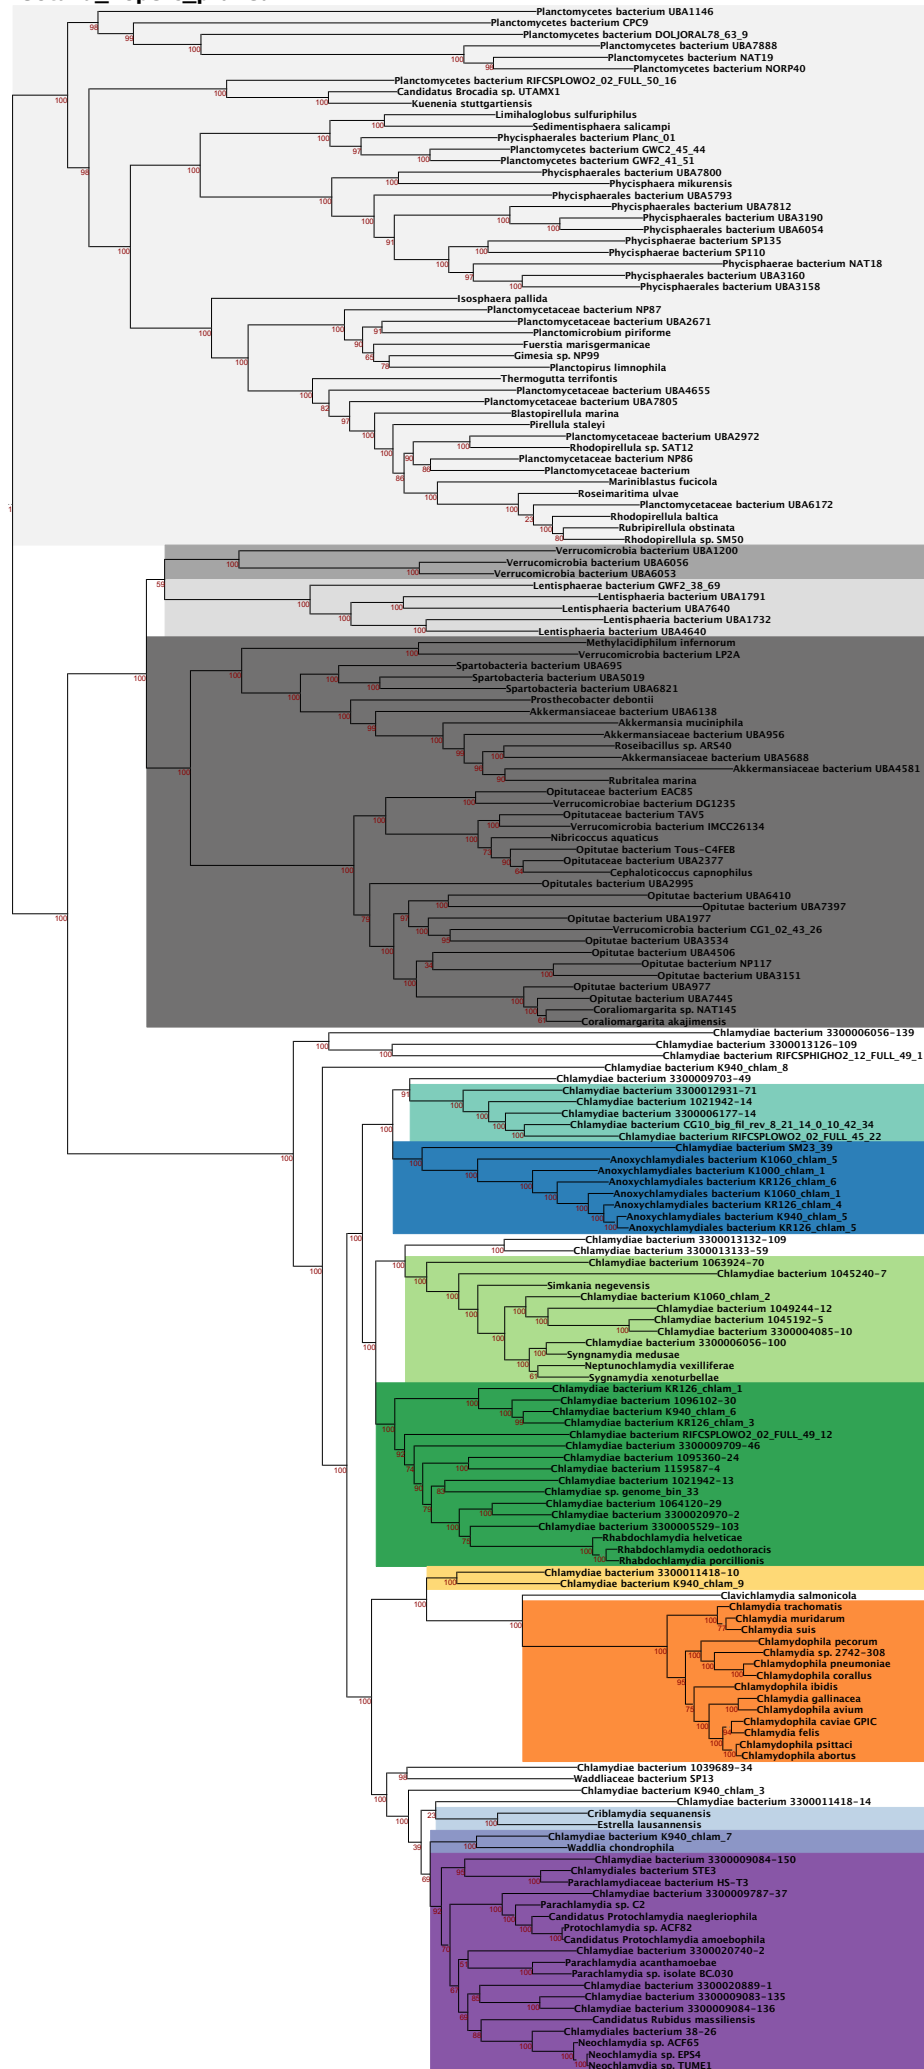

0.1





180taxa\_40perc\_pruned

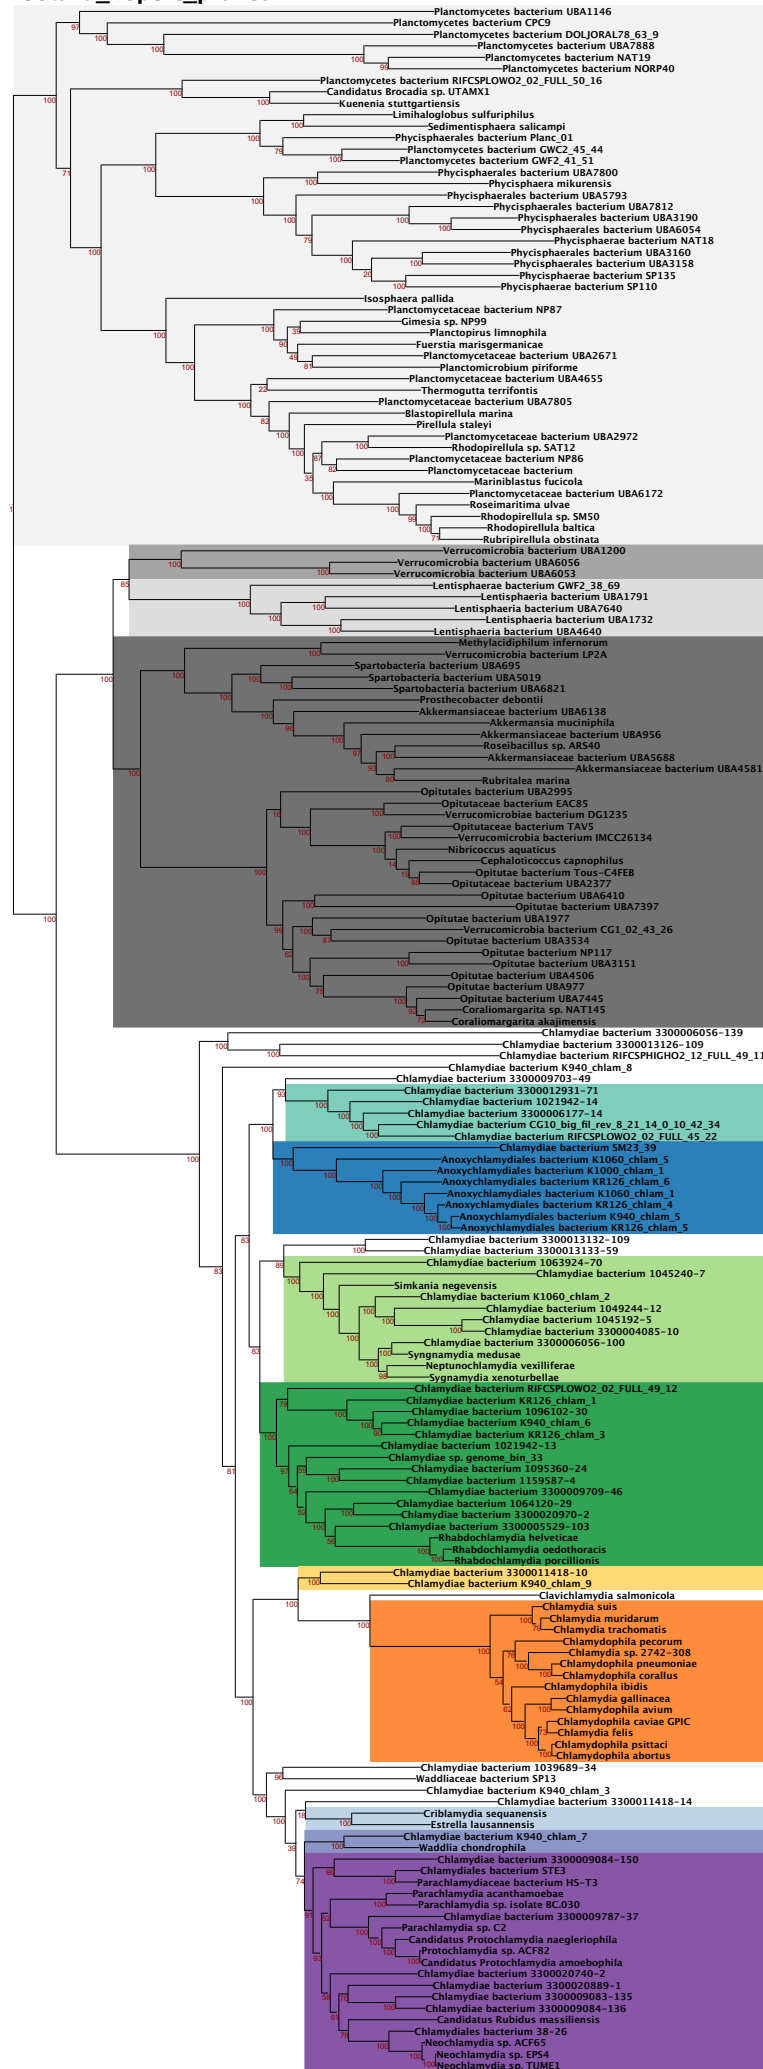

0.1

180taxa\_50perc\_pruned

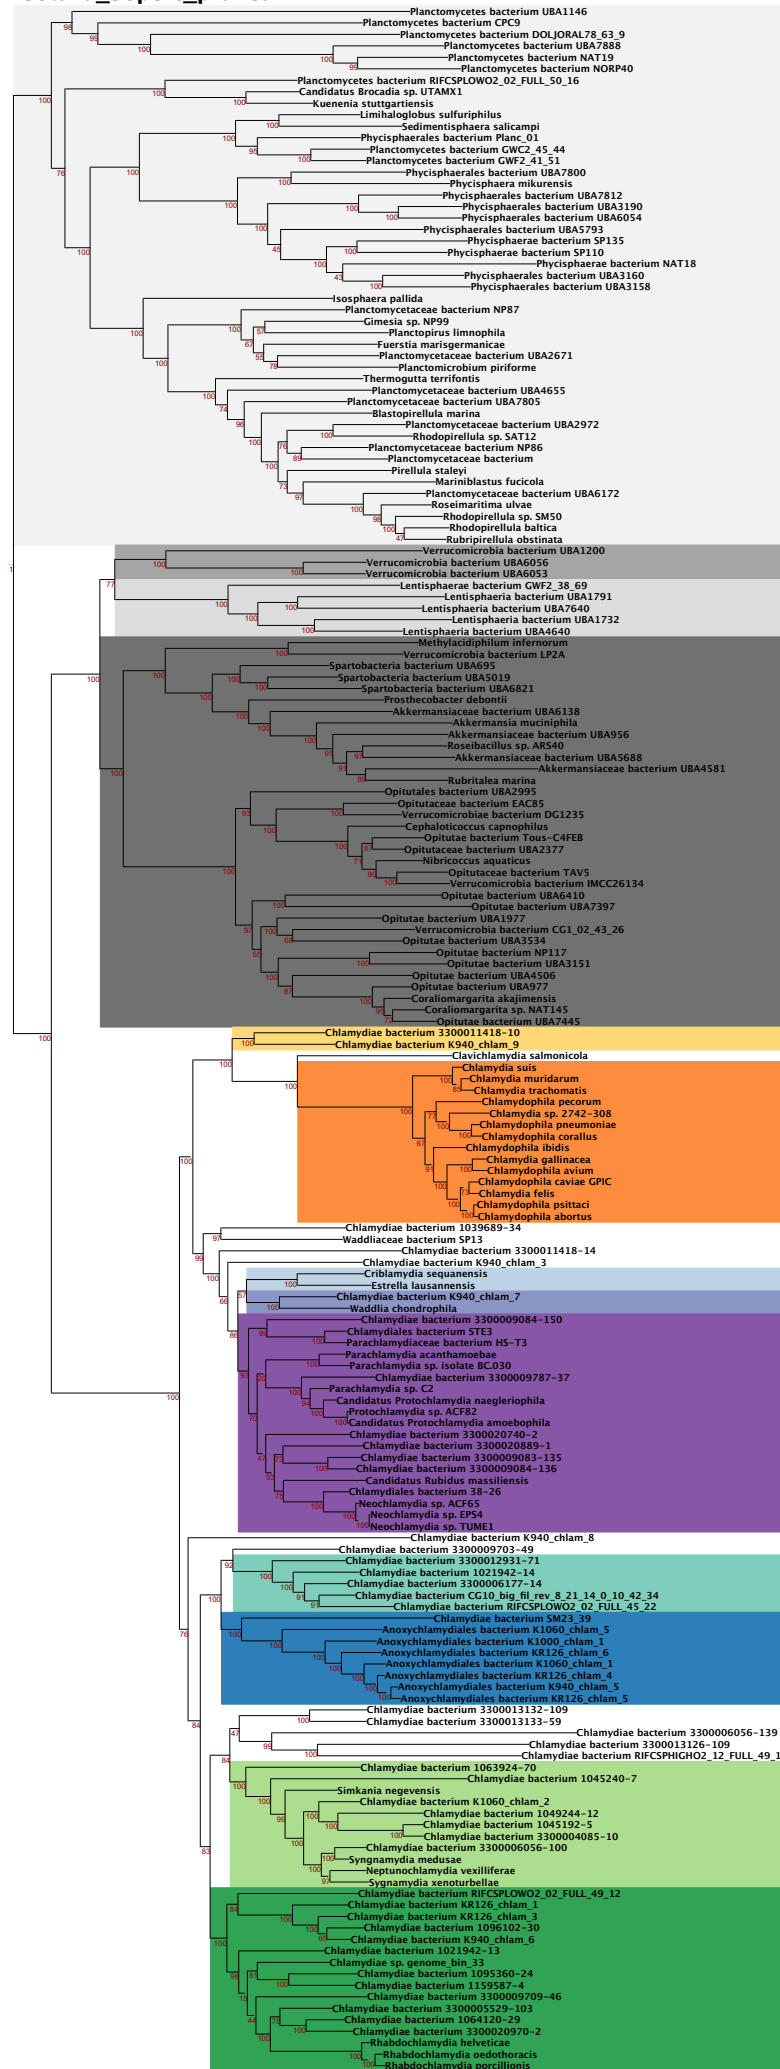

0.1

180taxa\_51perc\_pruned\_bias\_removed

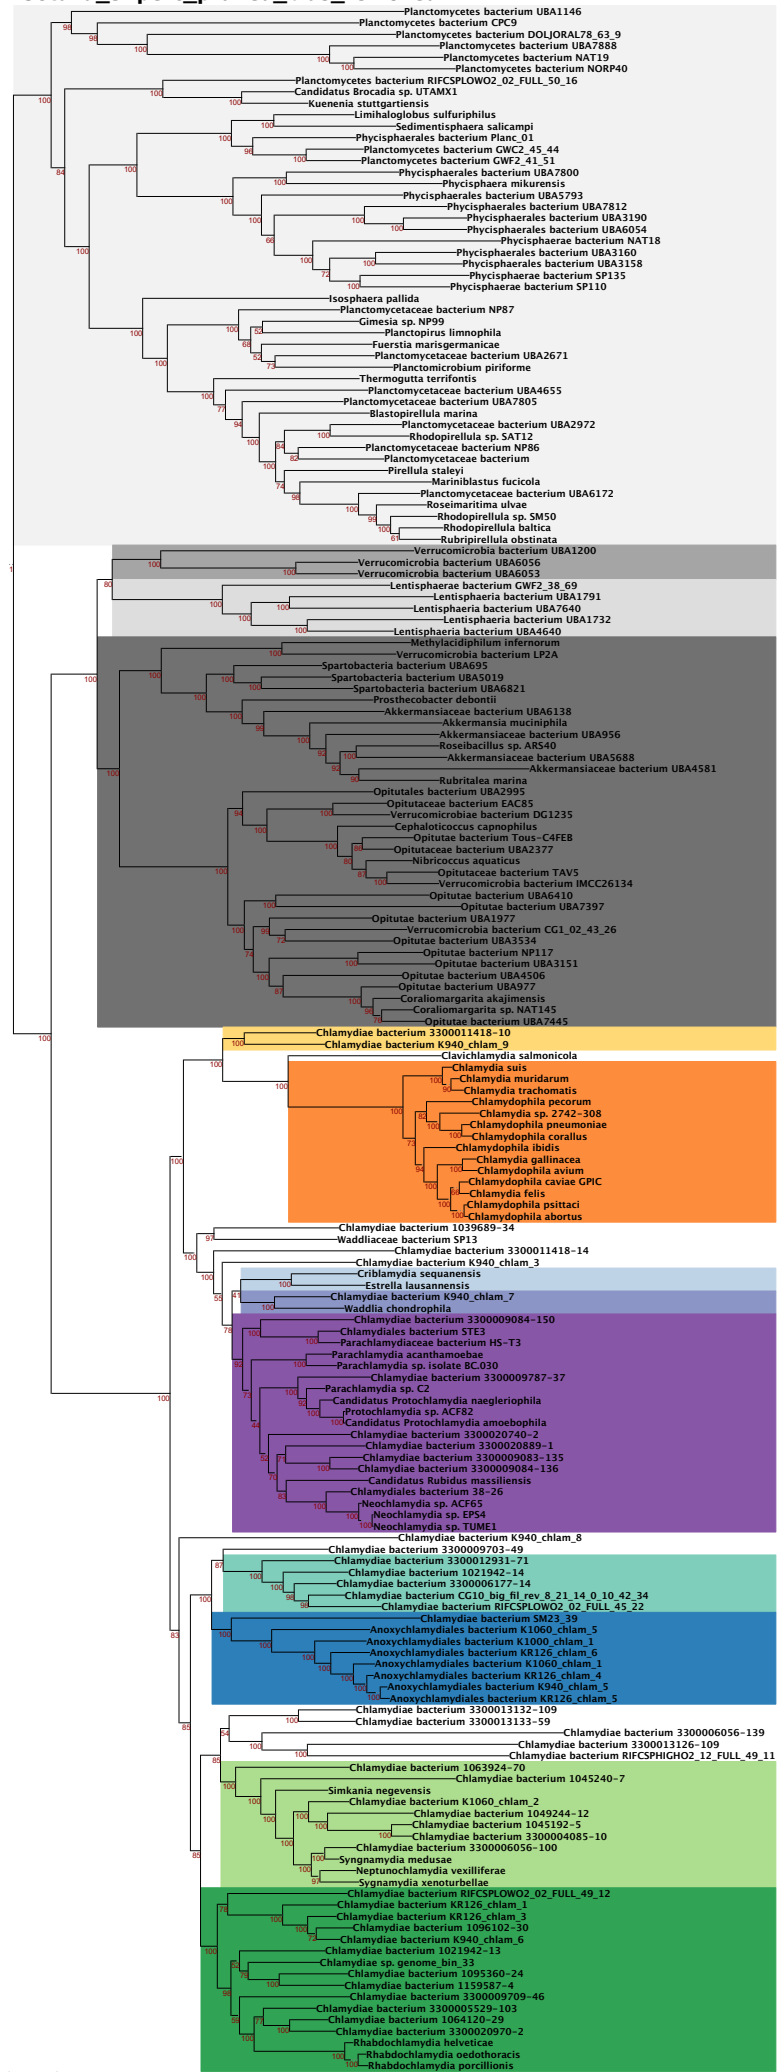

180taxa\_51perc\_pruned\_bias\_removed

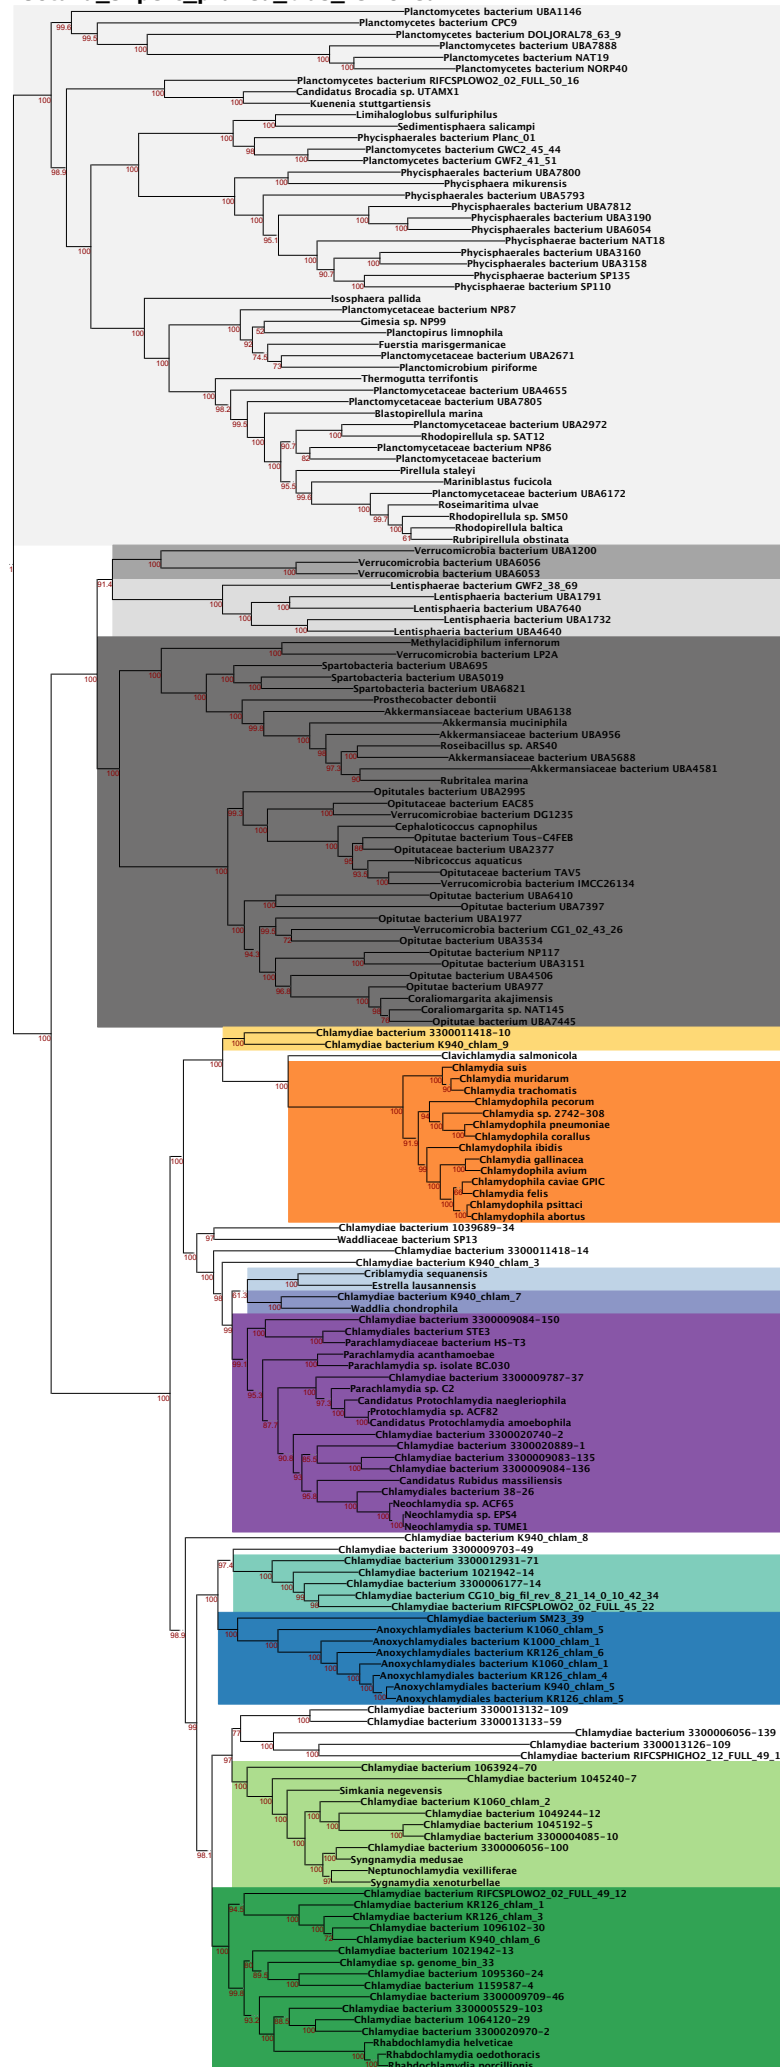

0.1

chain1

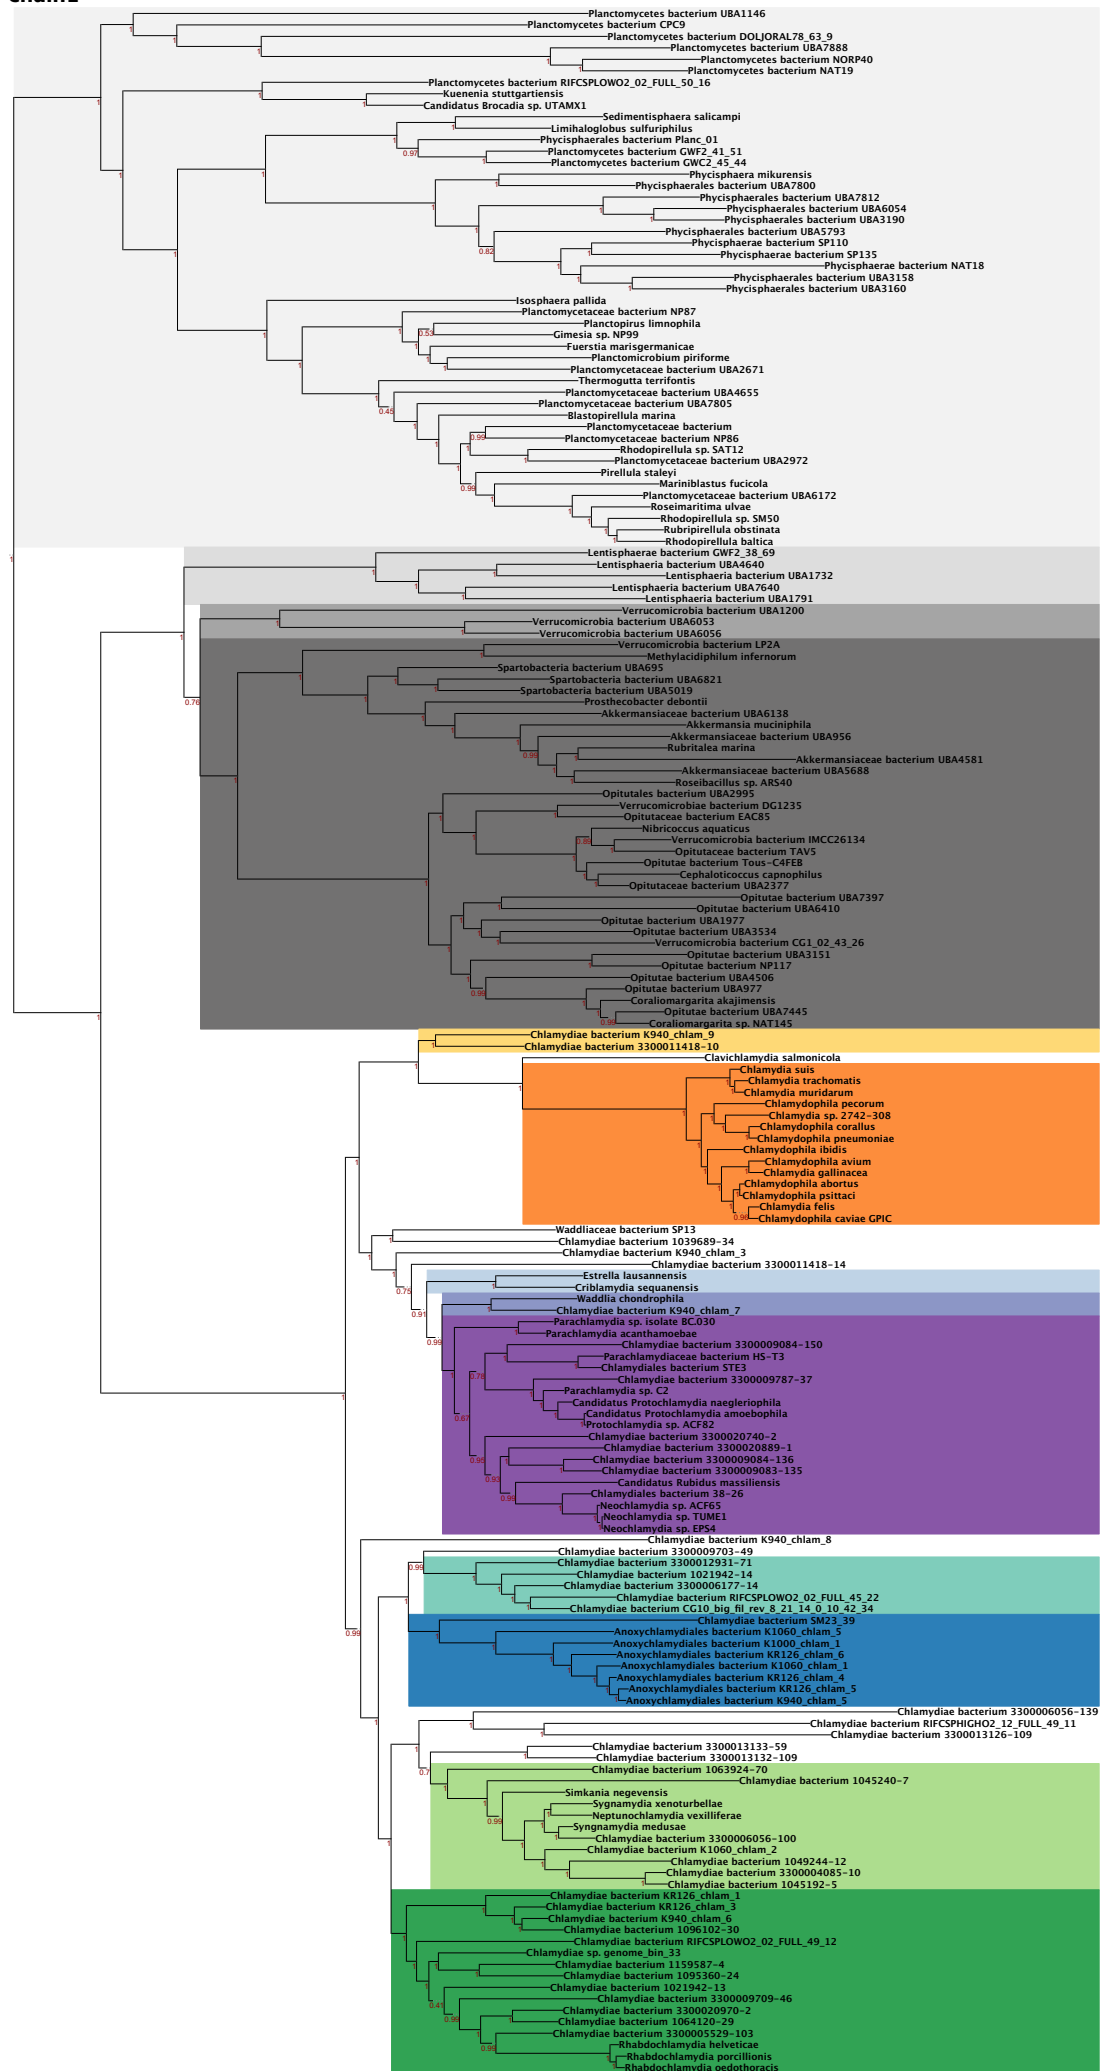

chain2

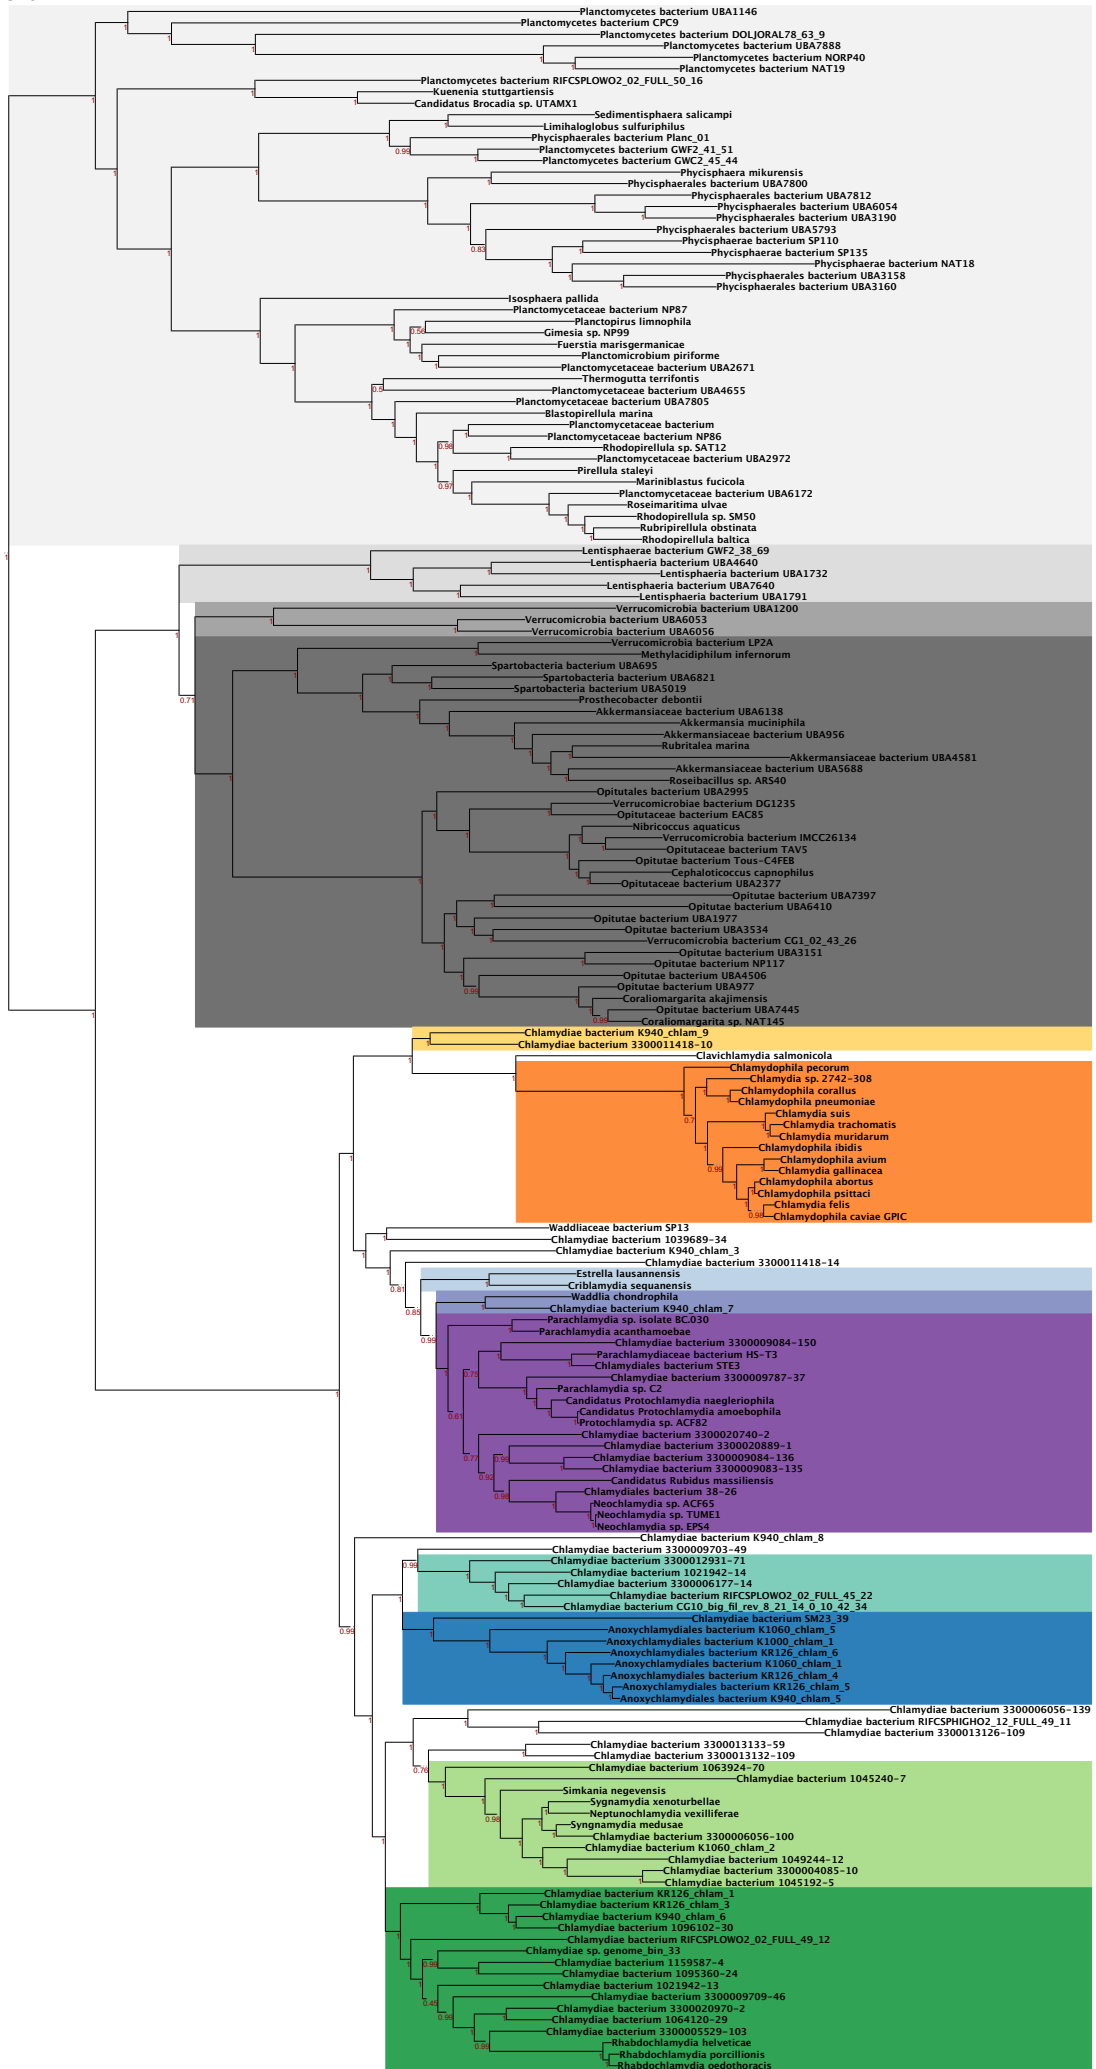

chain3

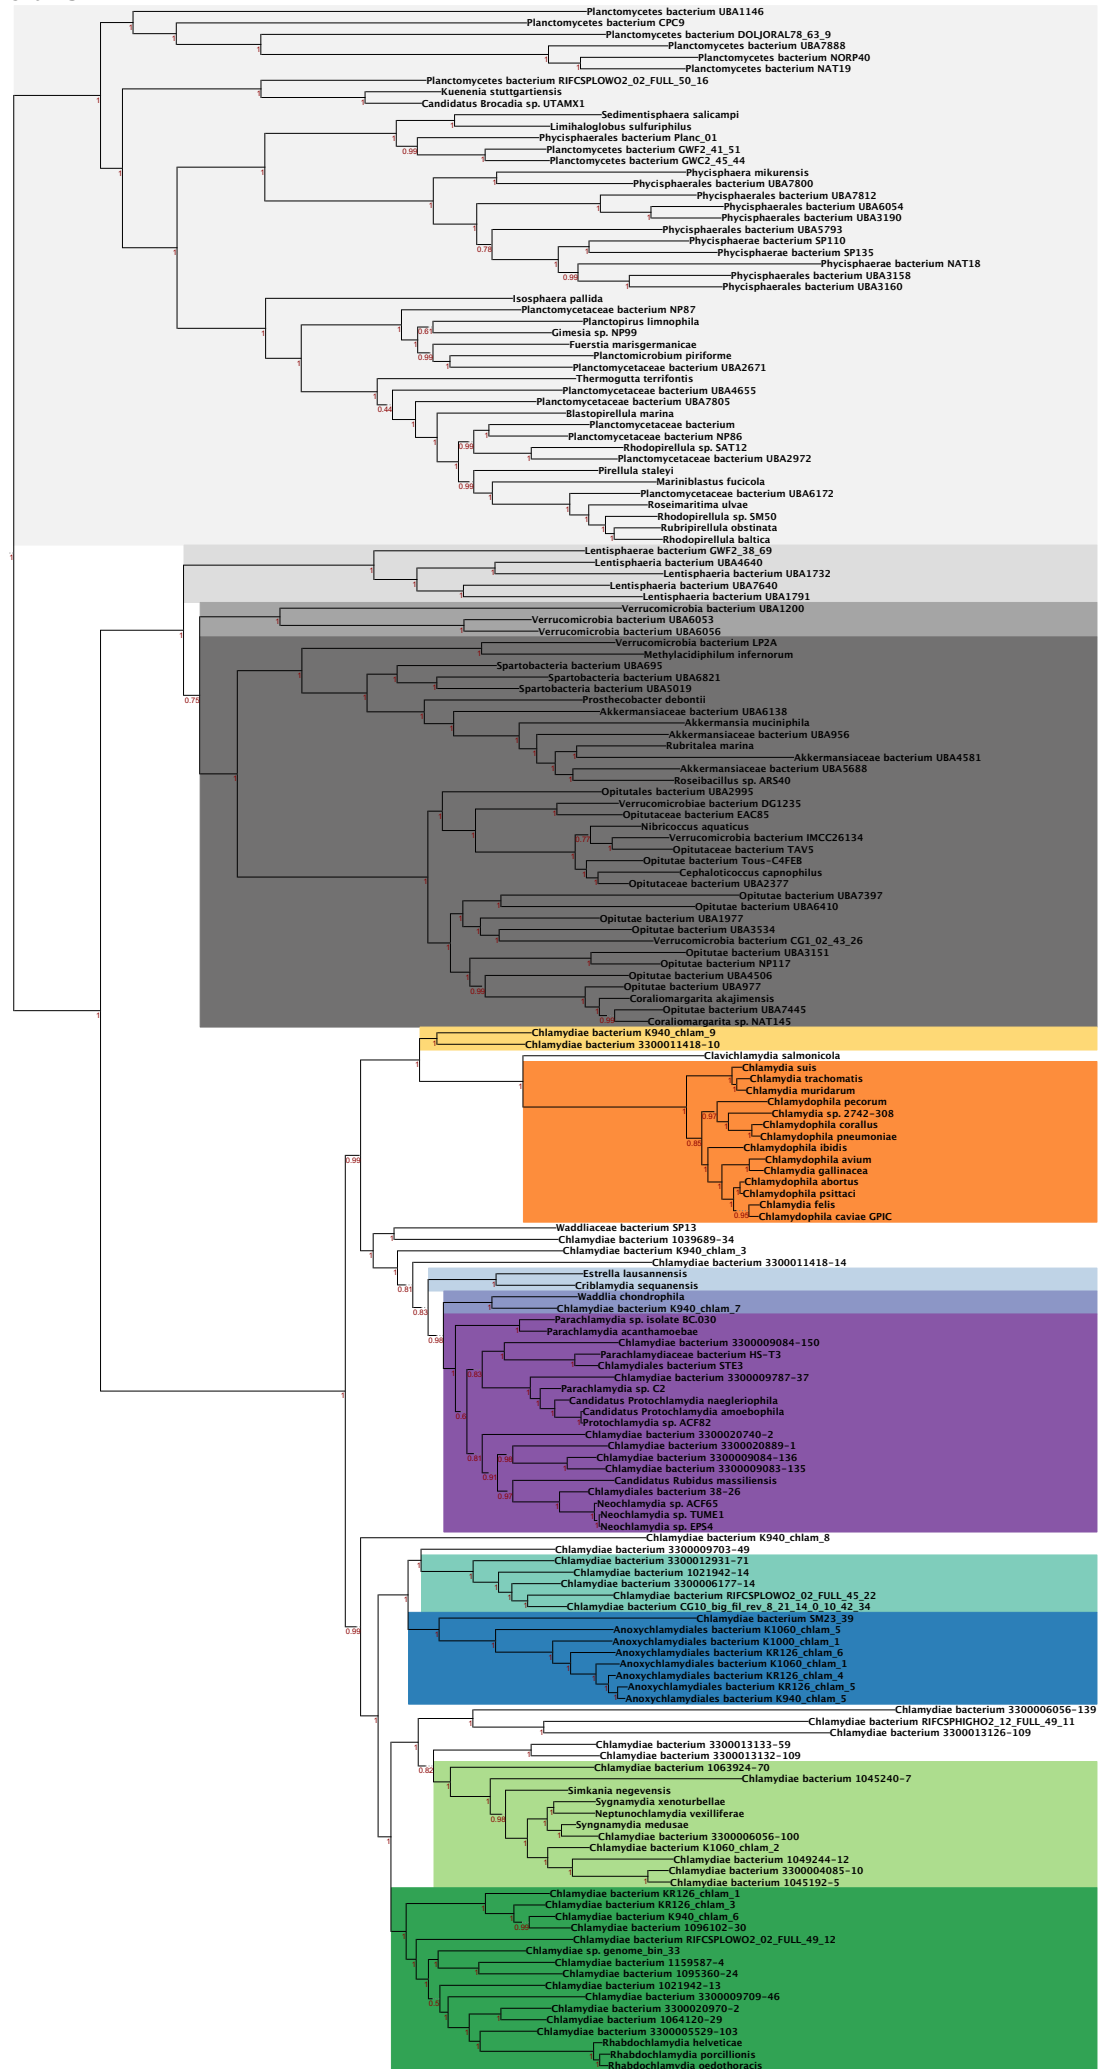

0.1



chain4

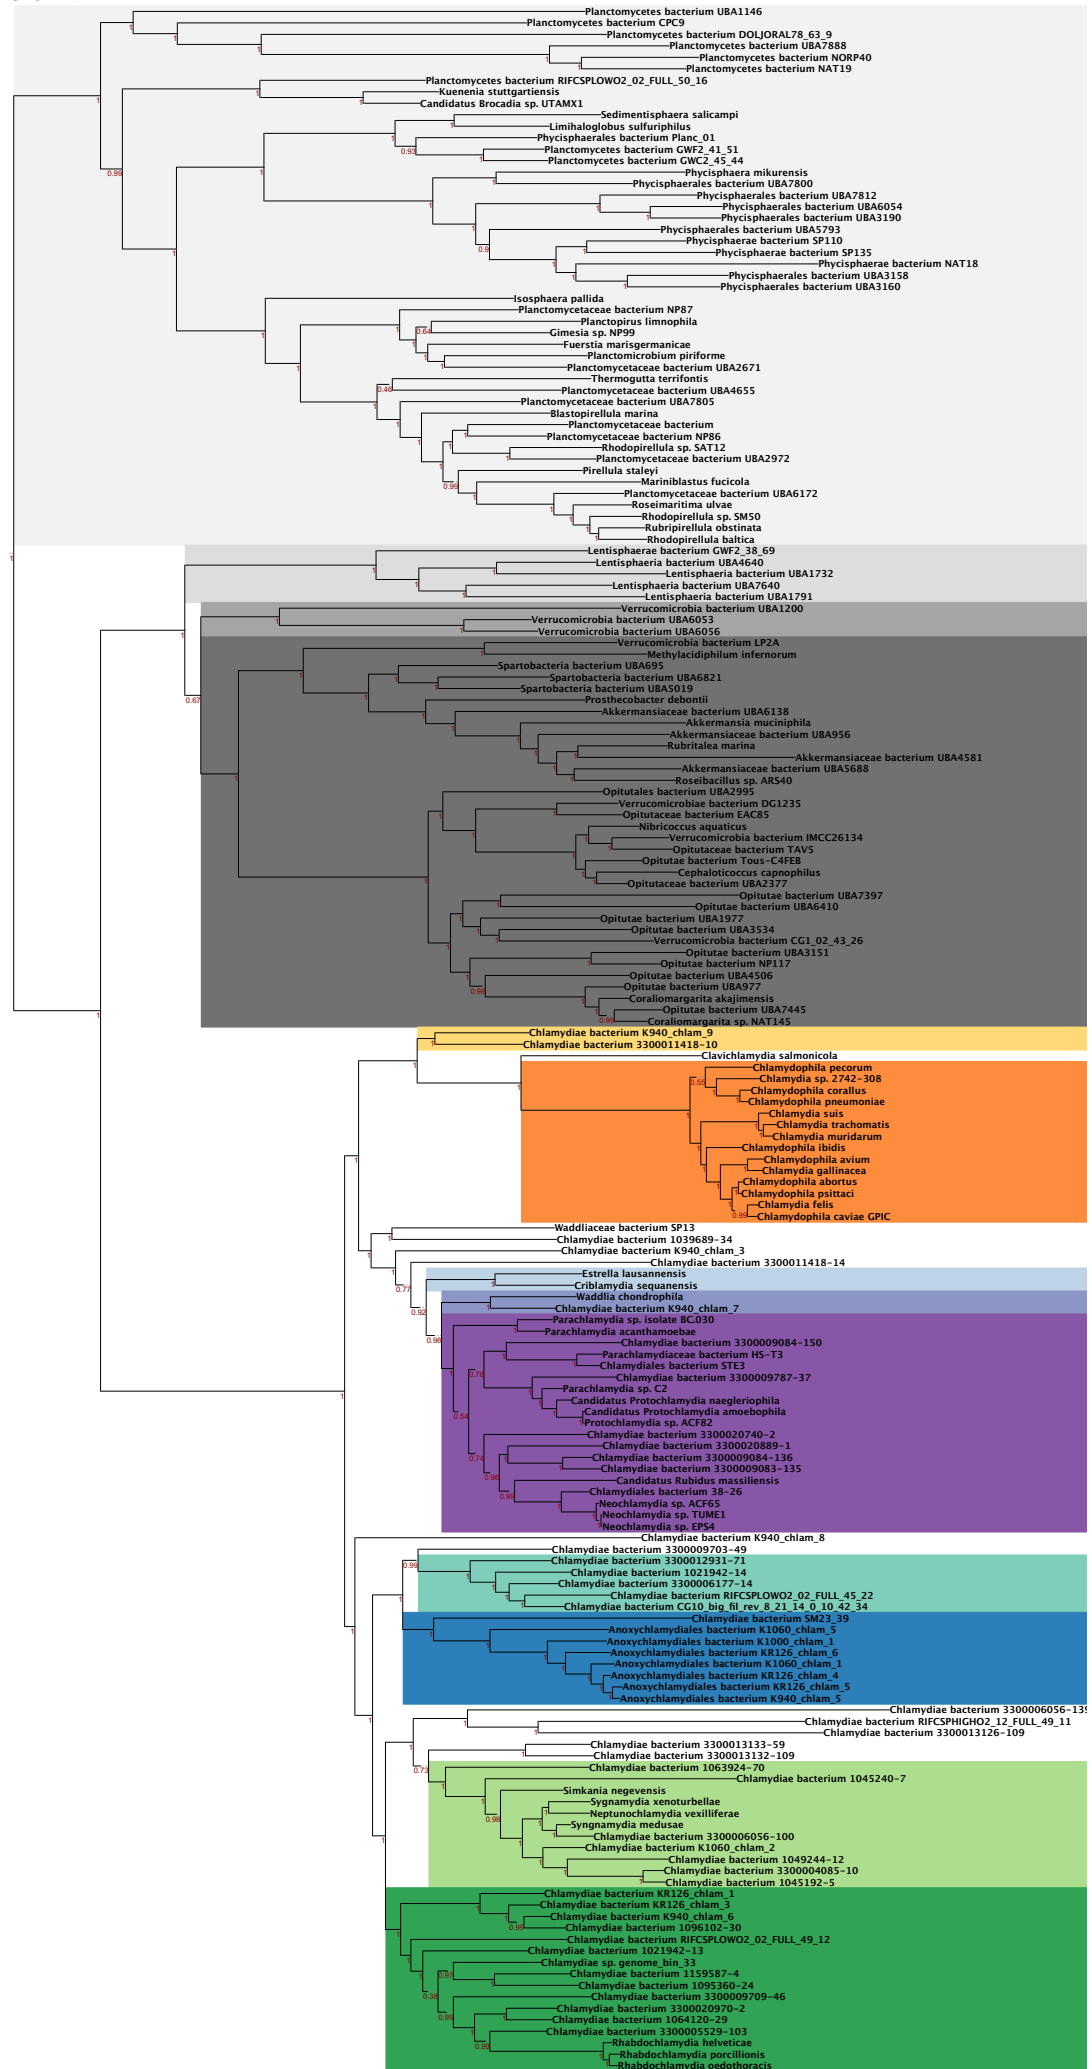

0.1



convergence\_chains\_1234

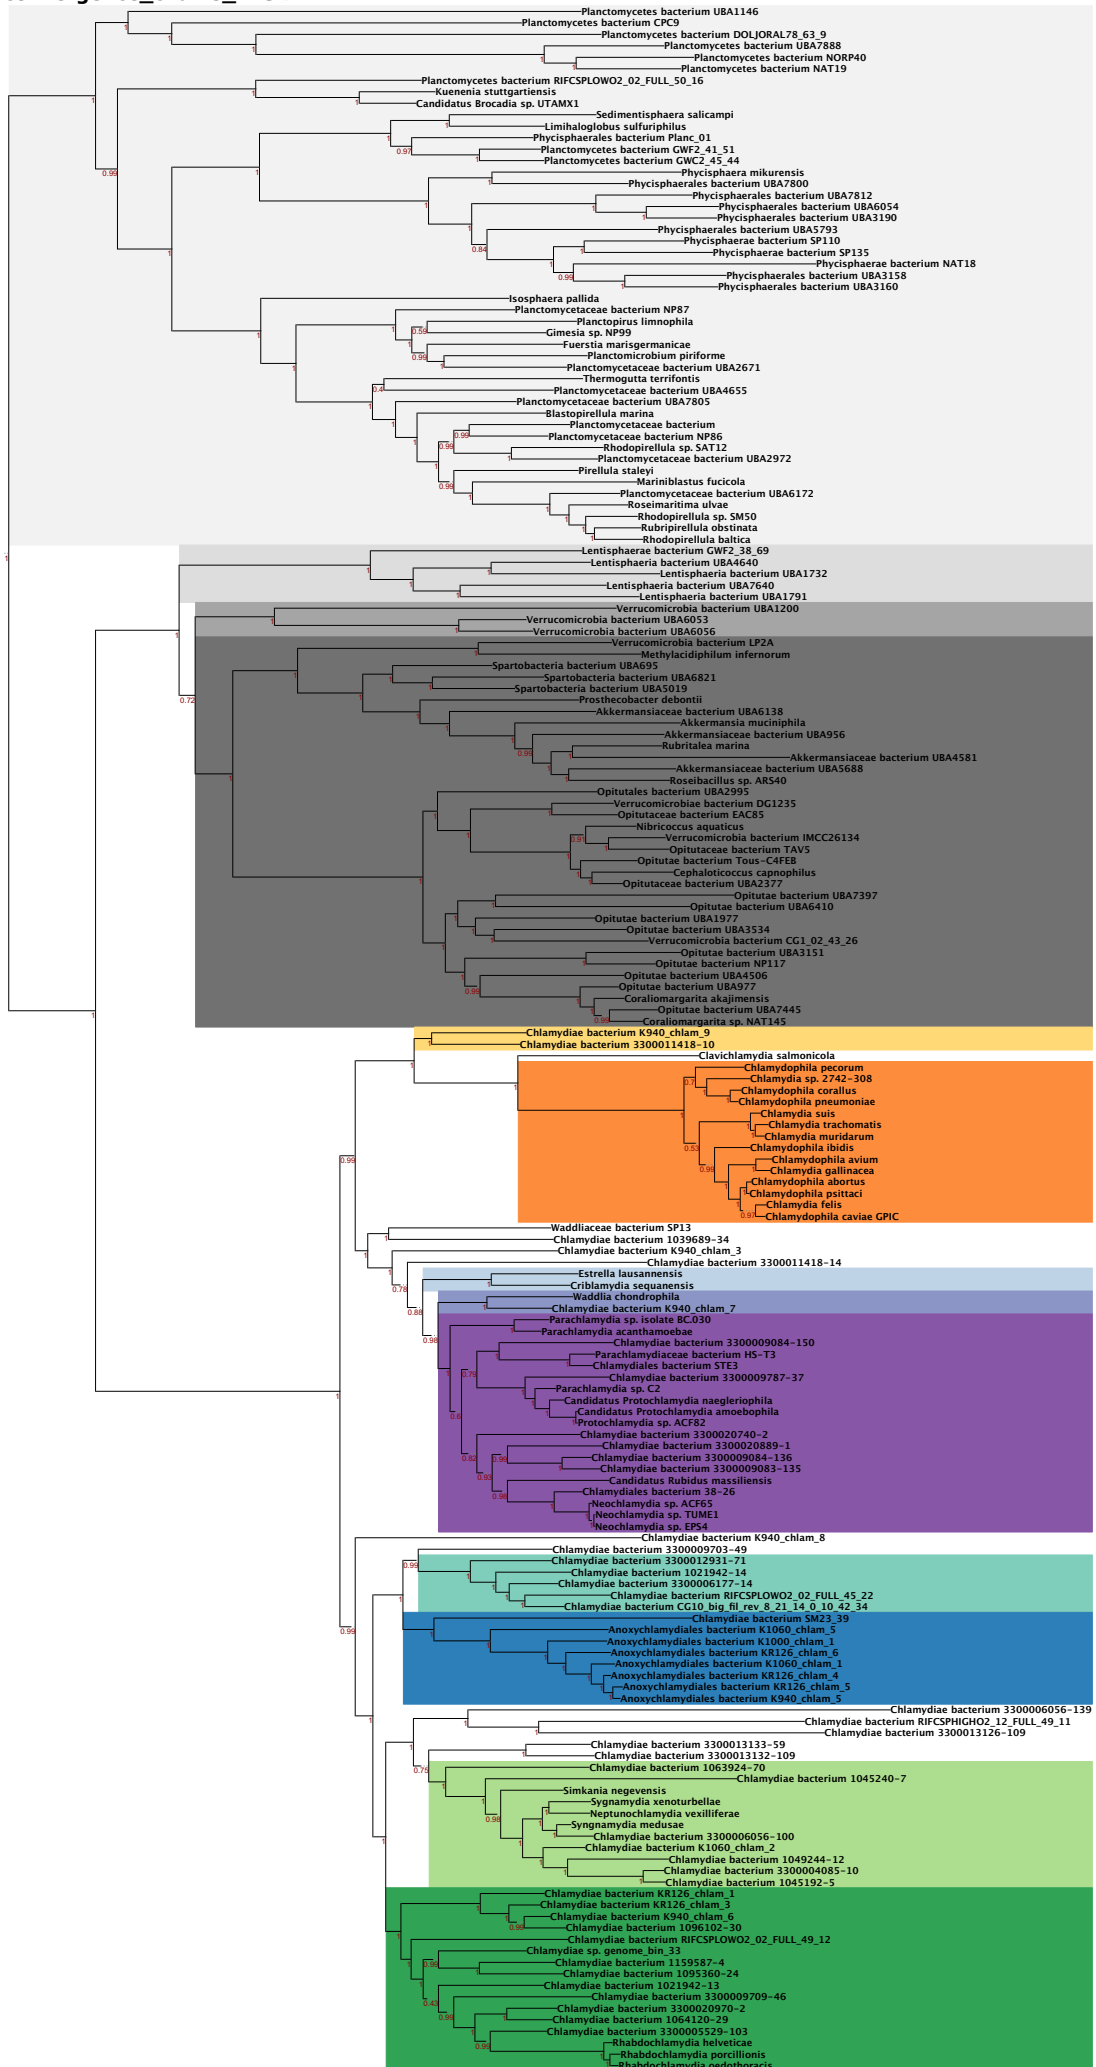



convergence\_chains\_24

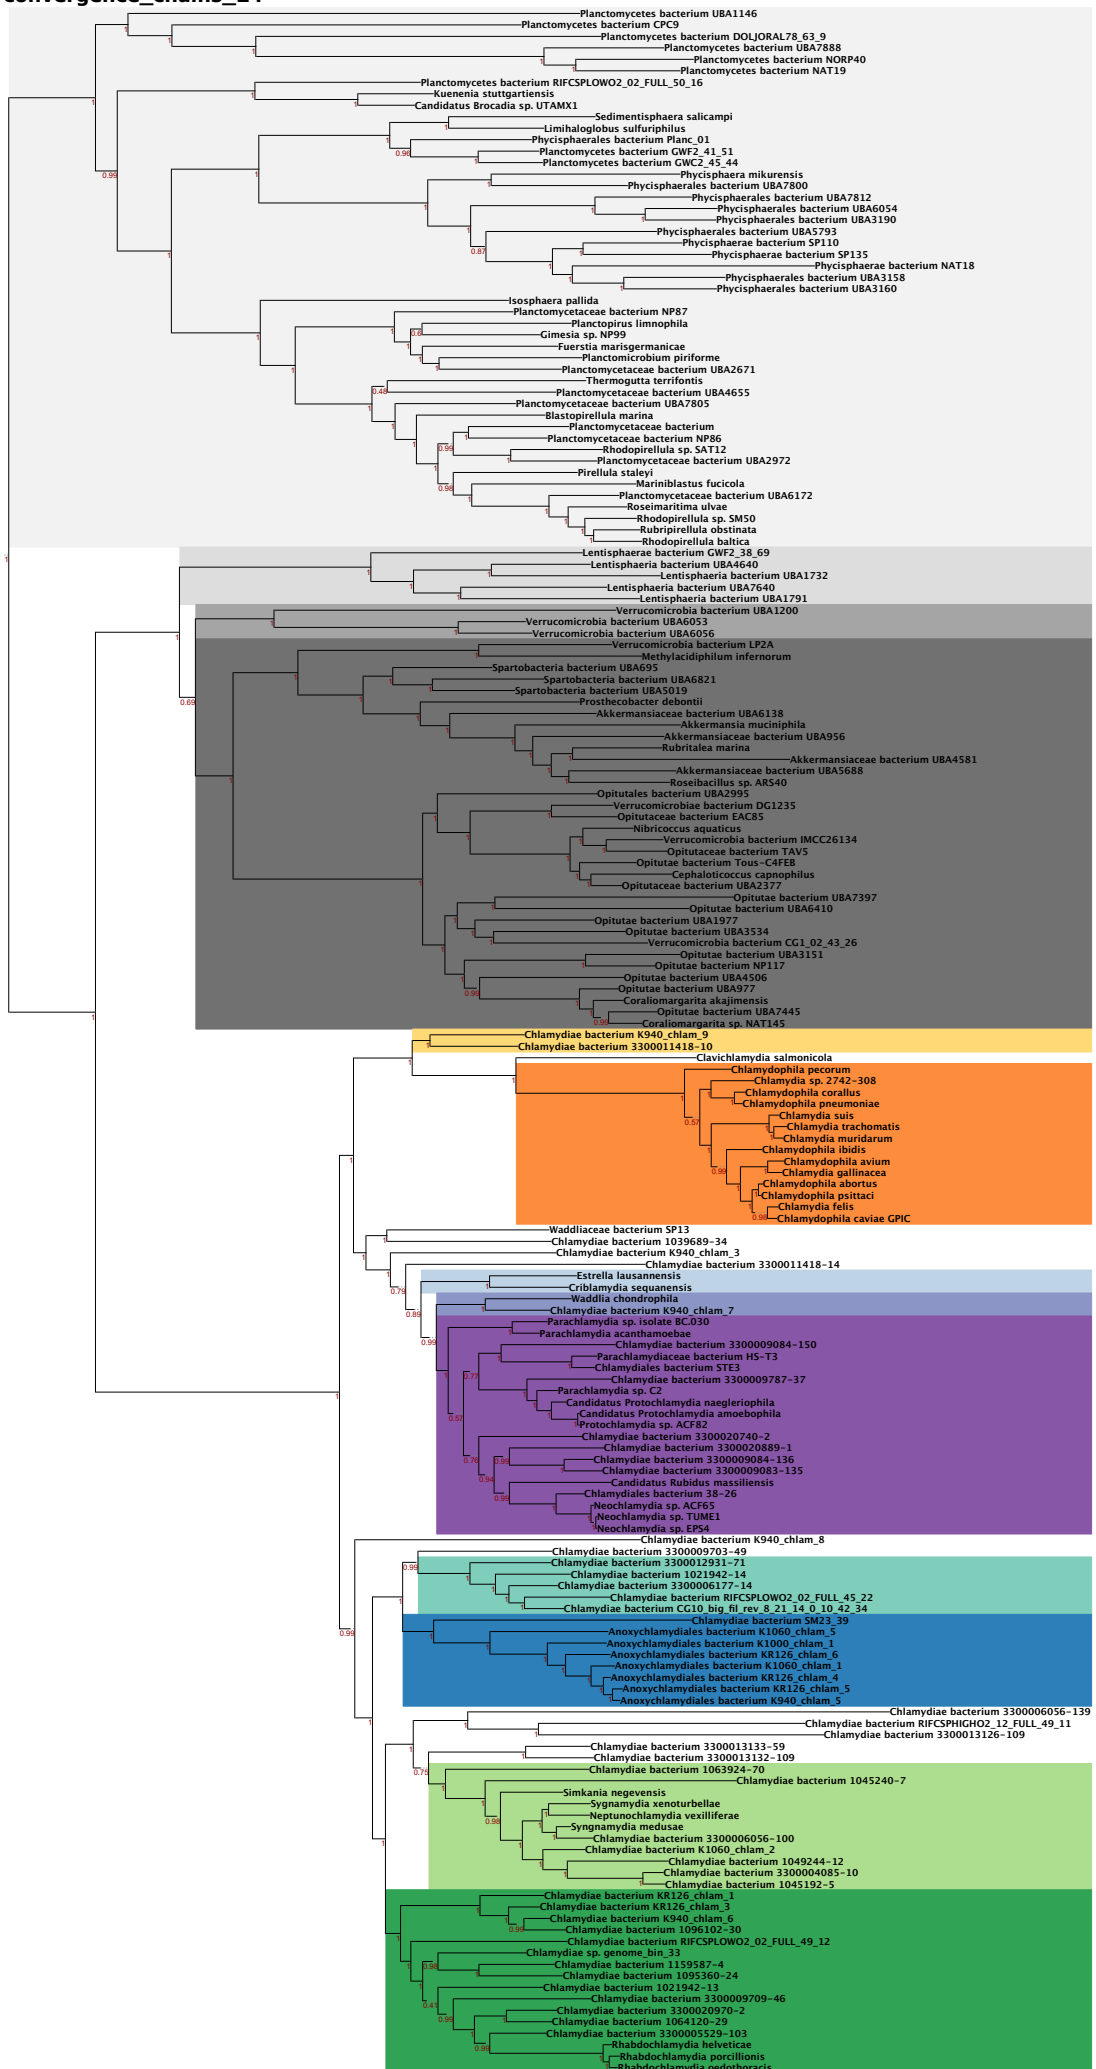

183taxa\_0perc\_pruned\_original

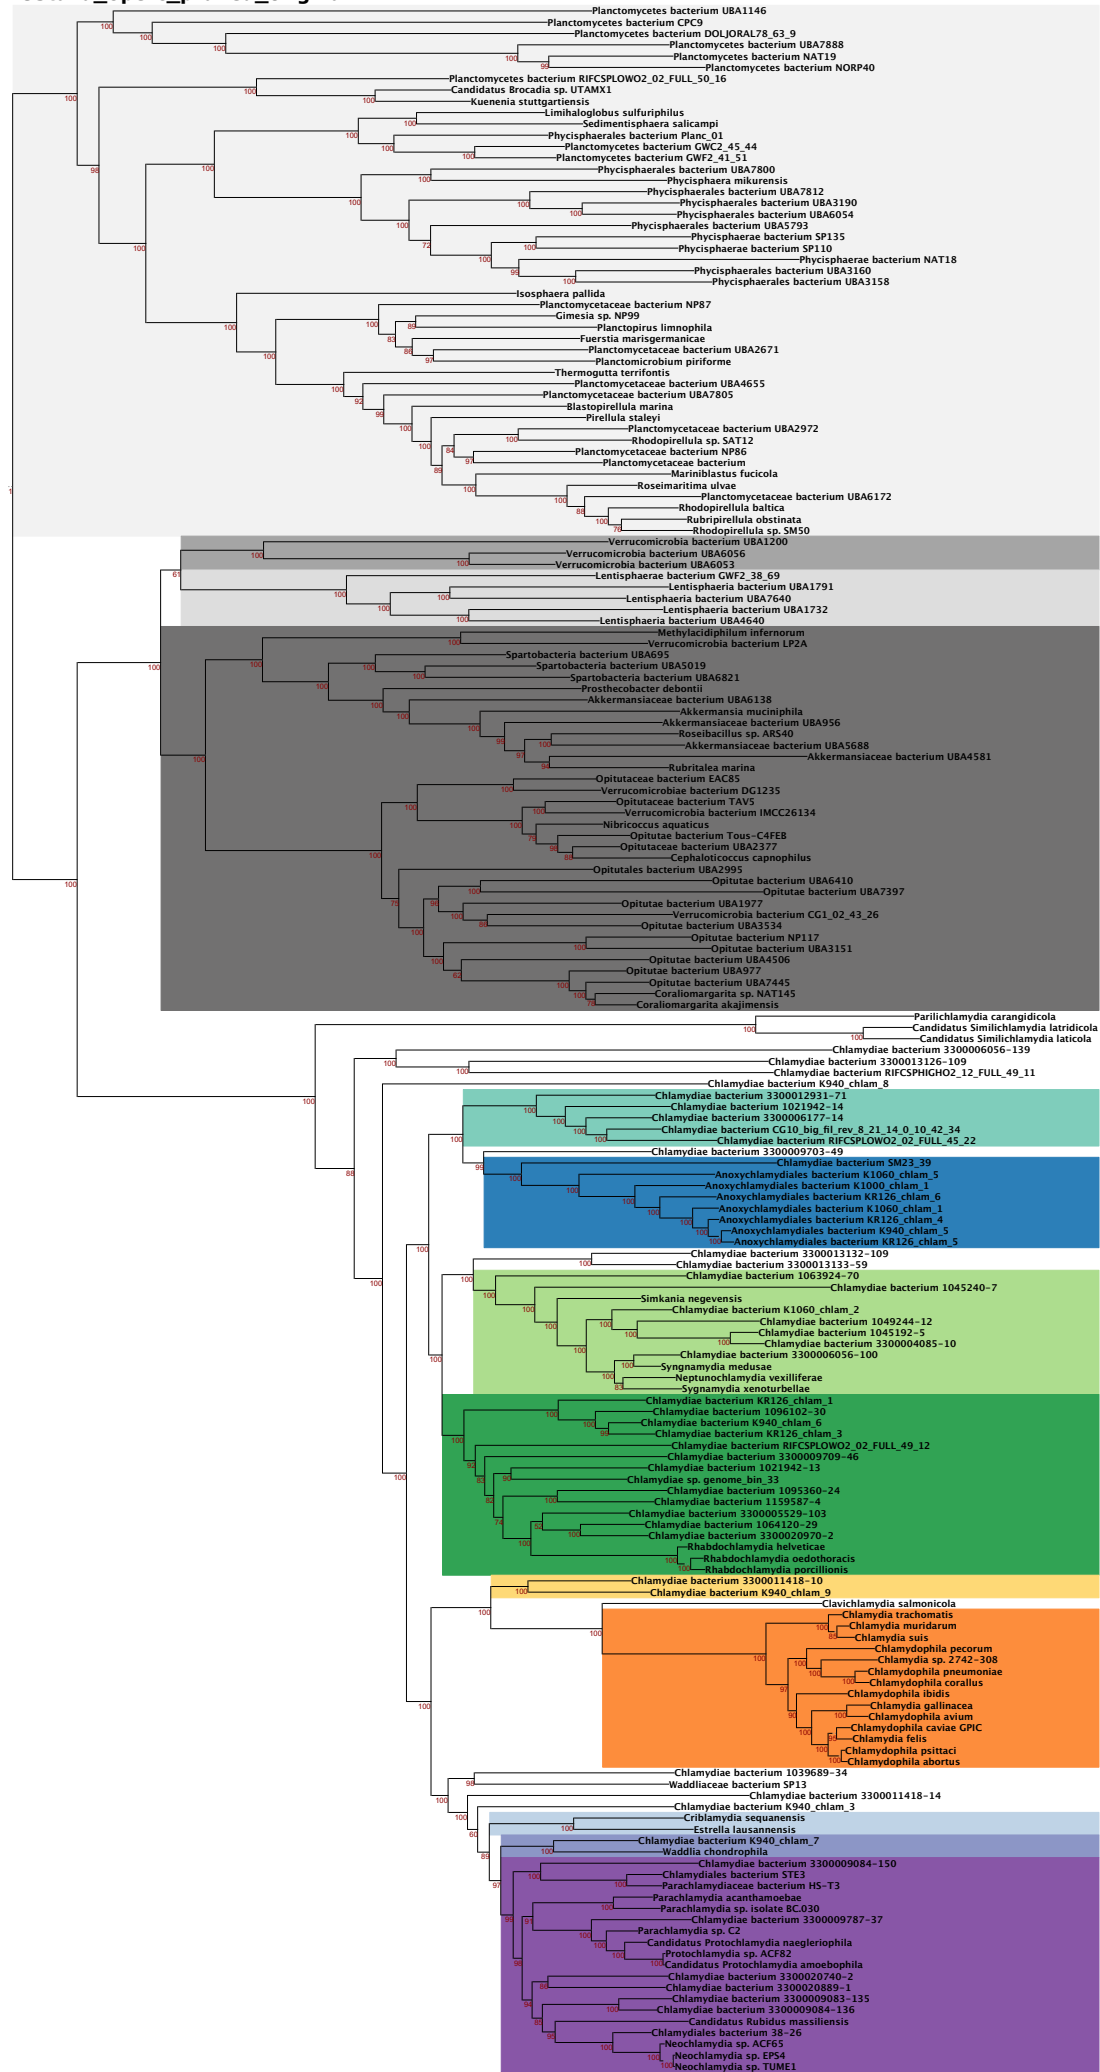

0.1





chain2

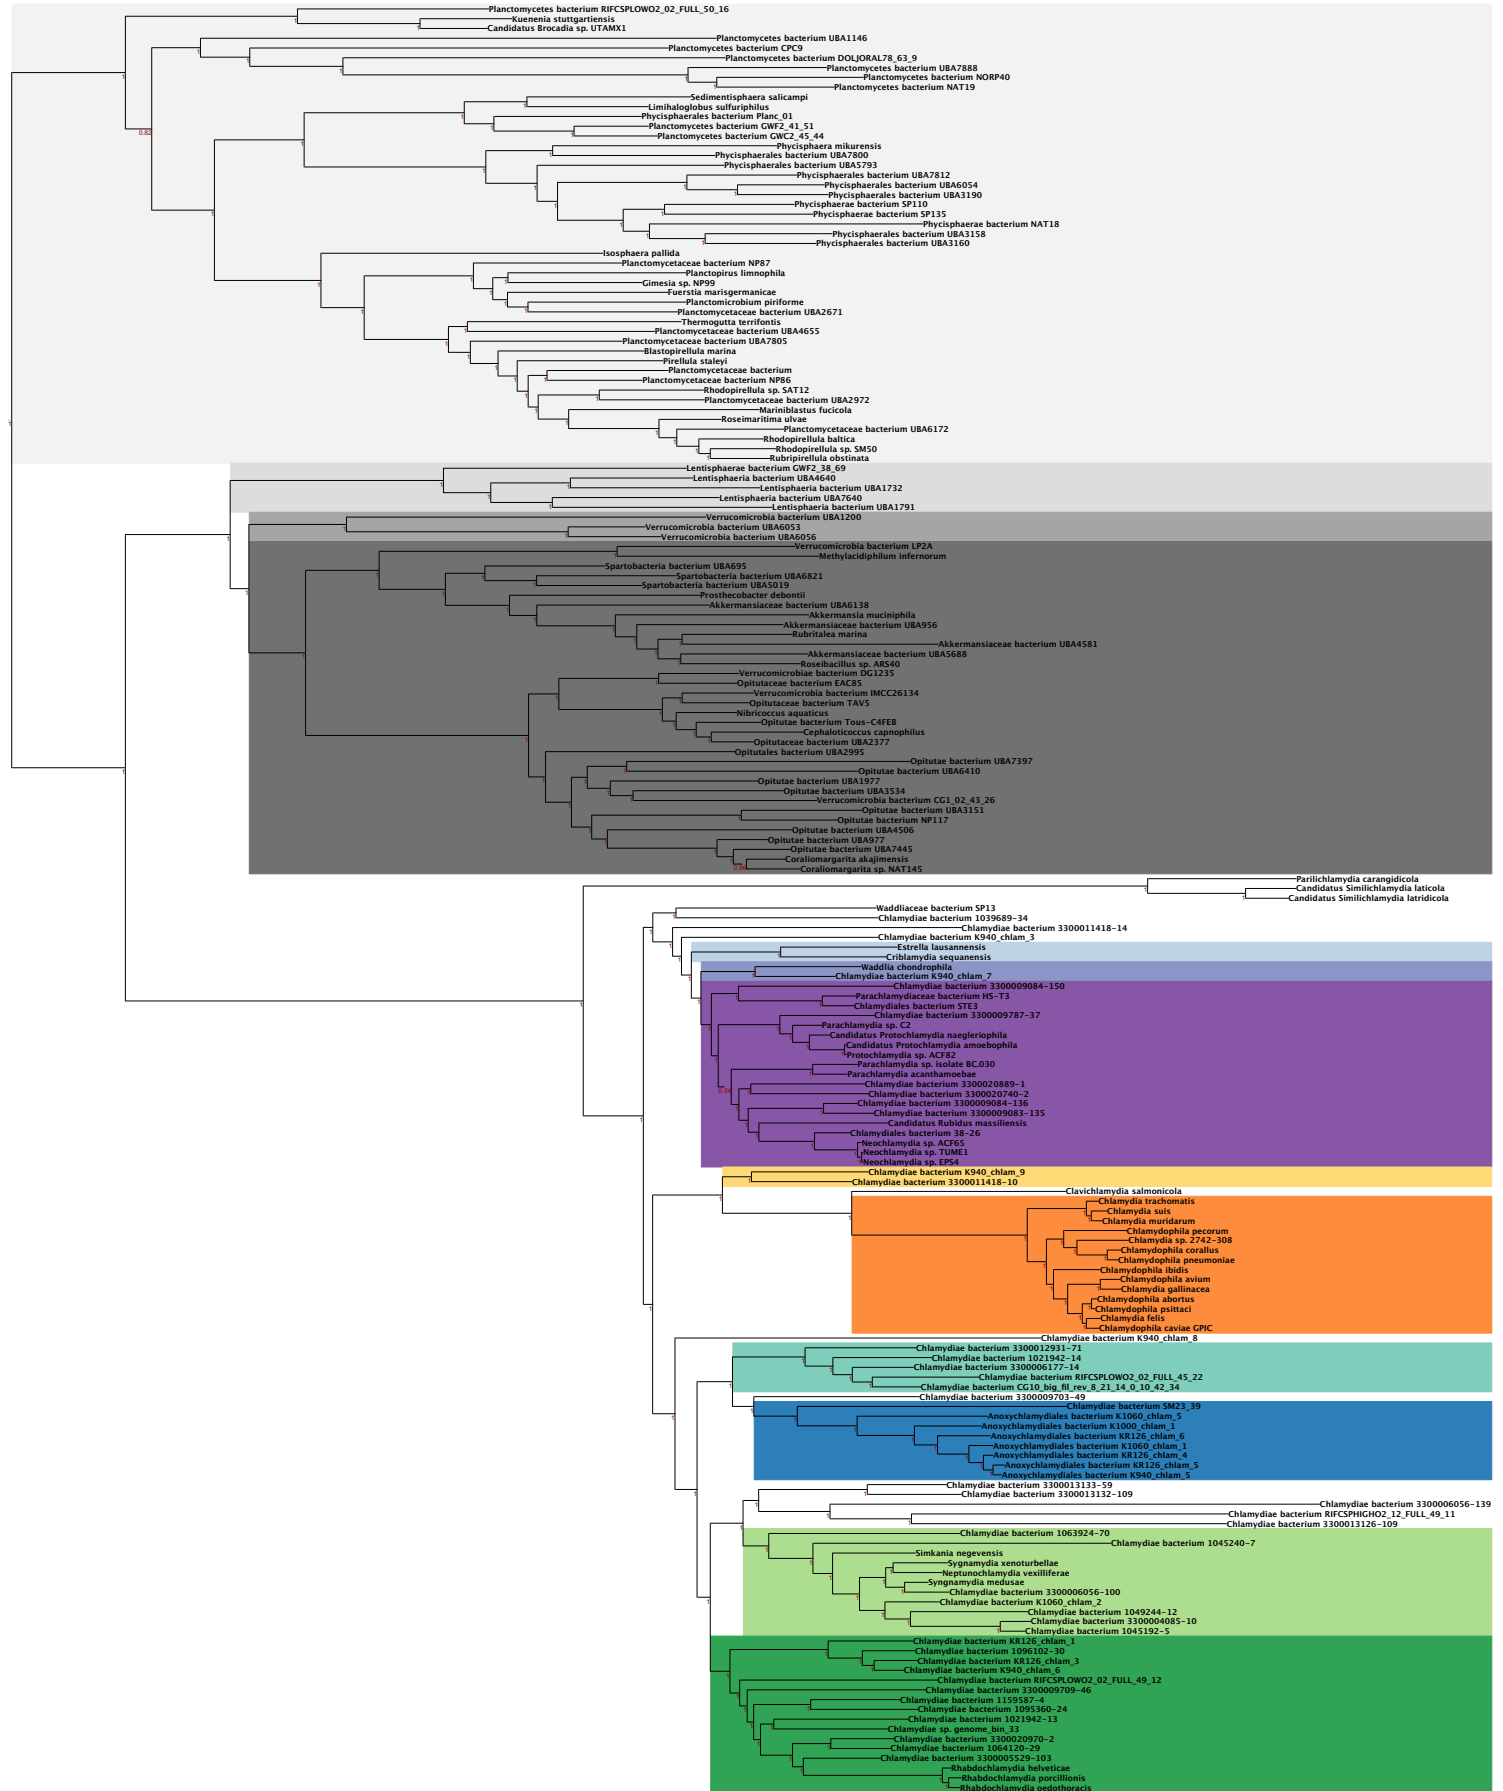

0.1

chain3

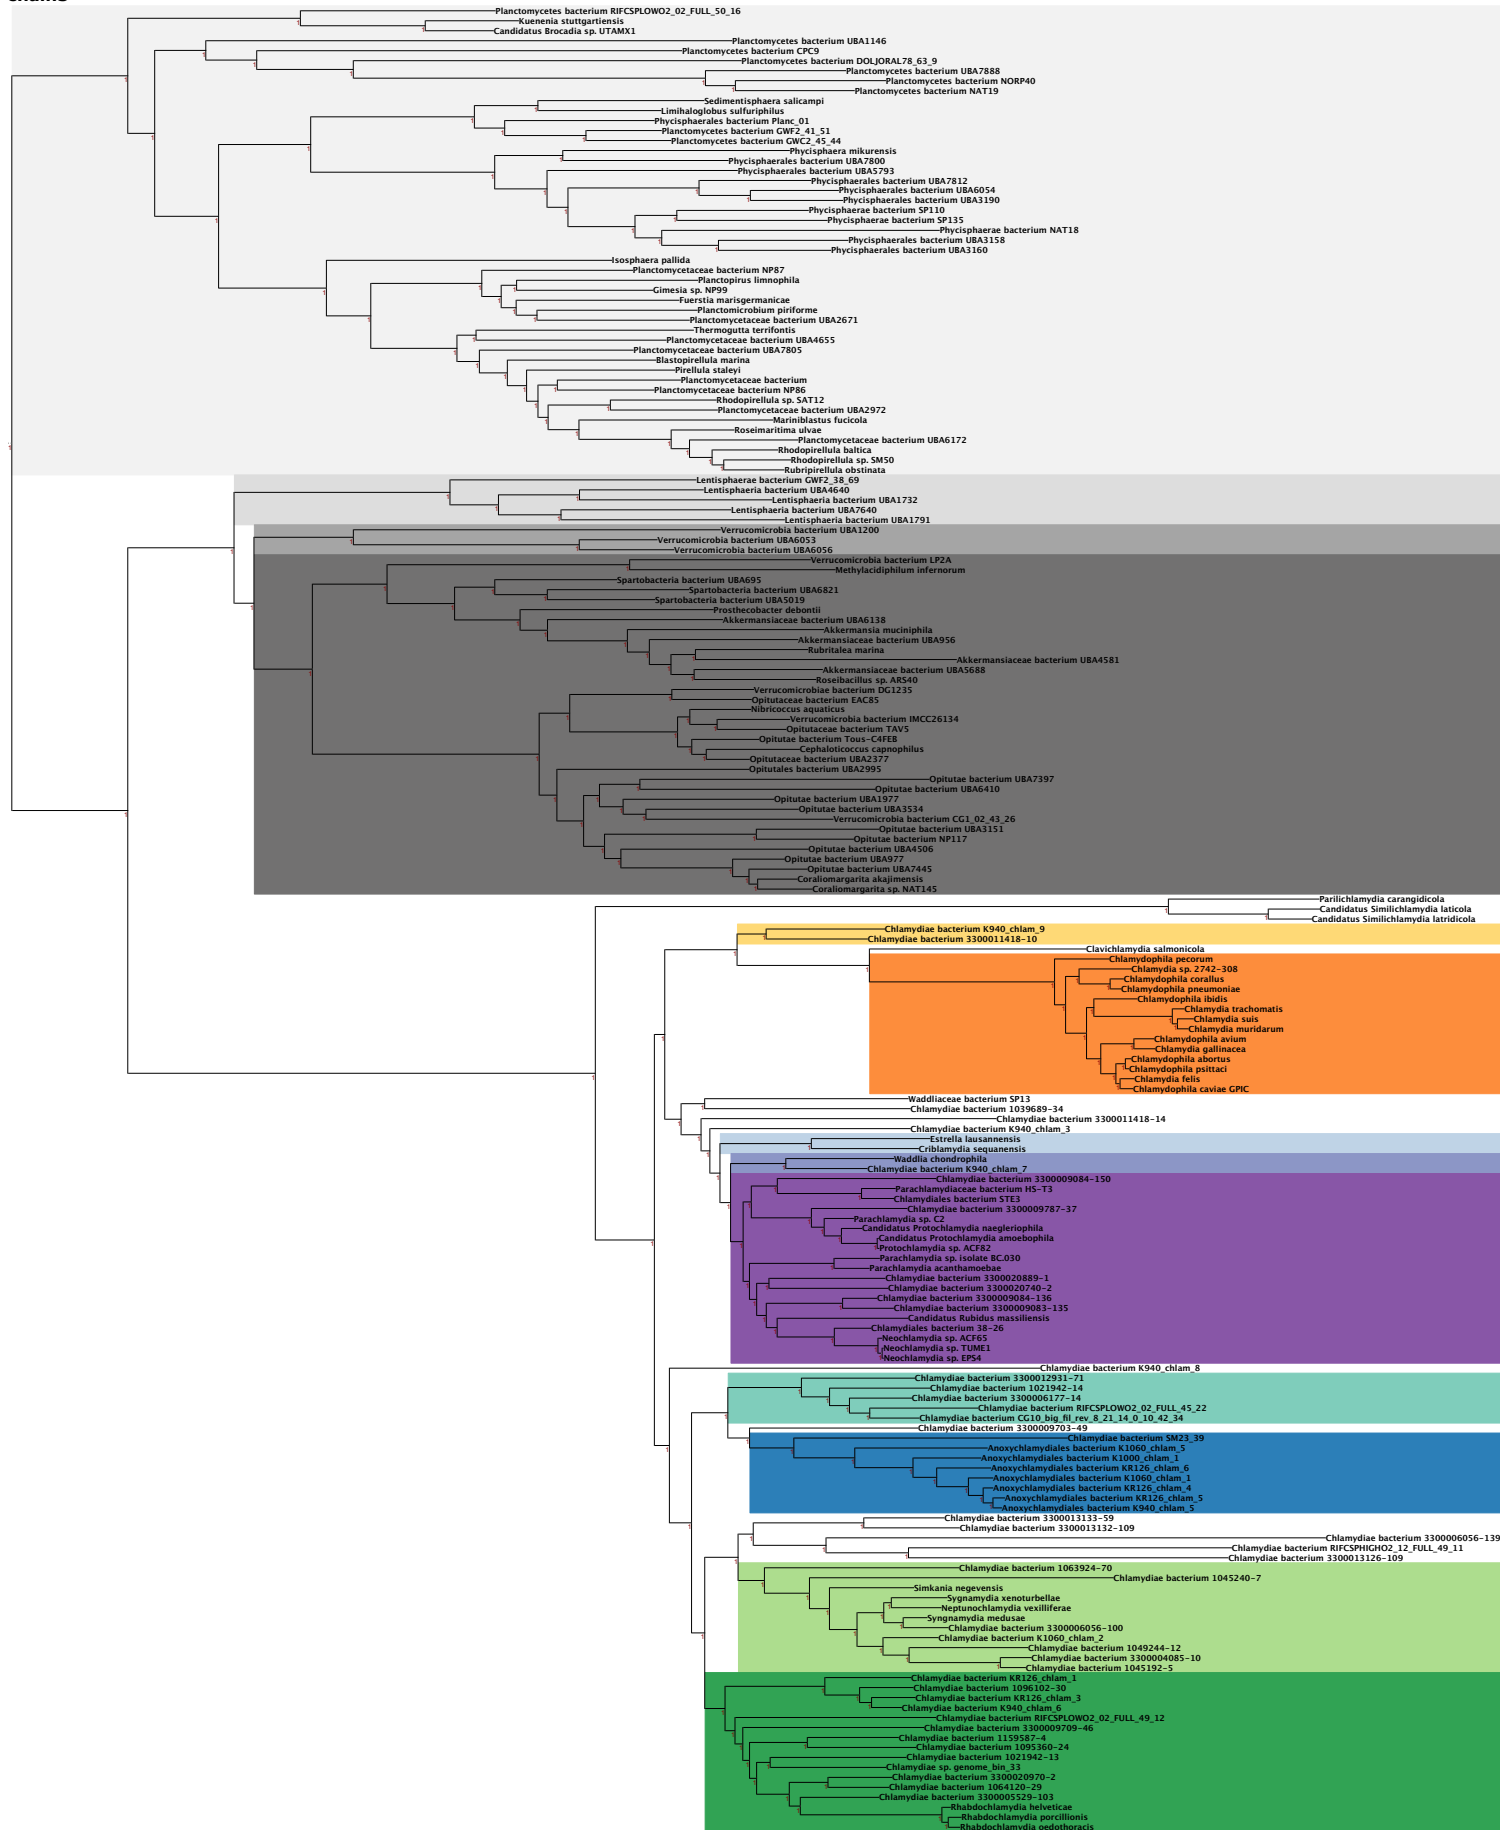

0.1



chain4

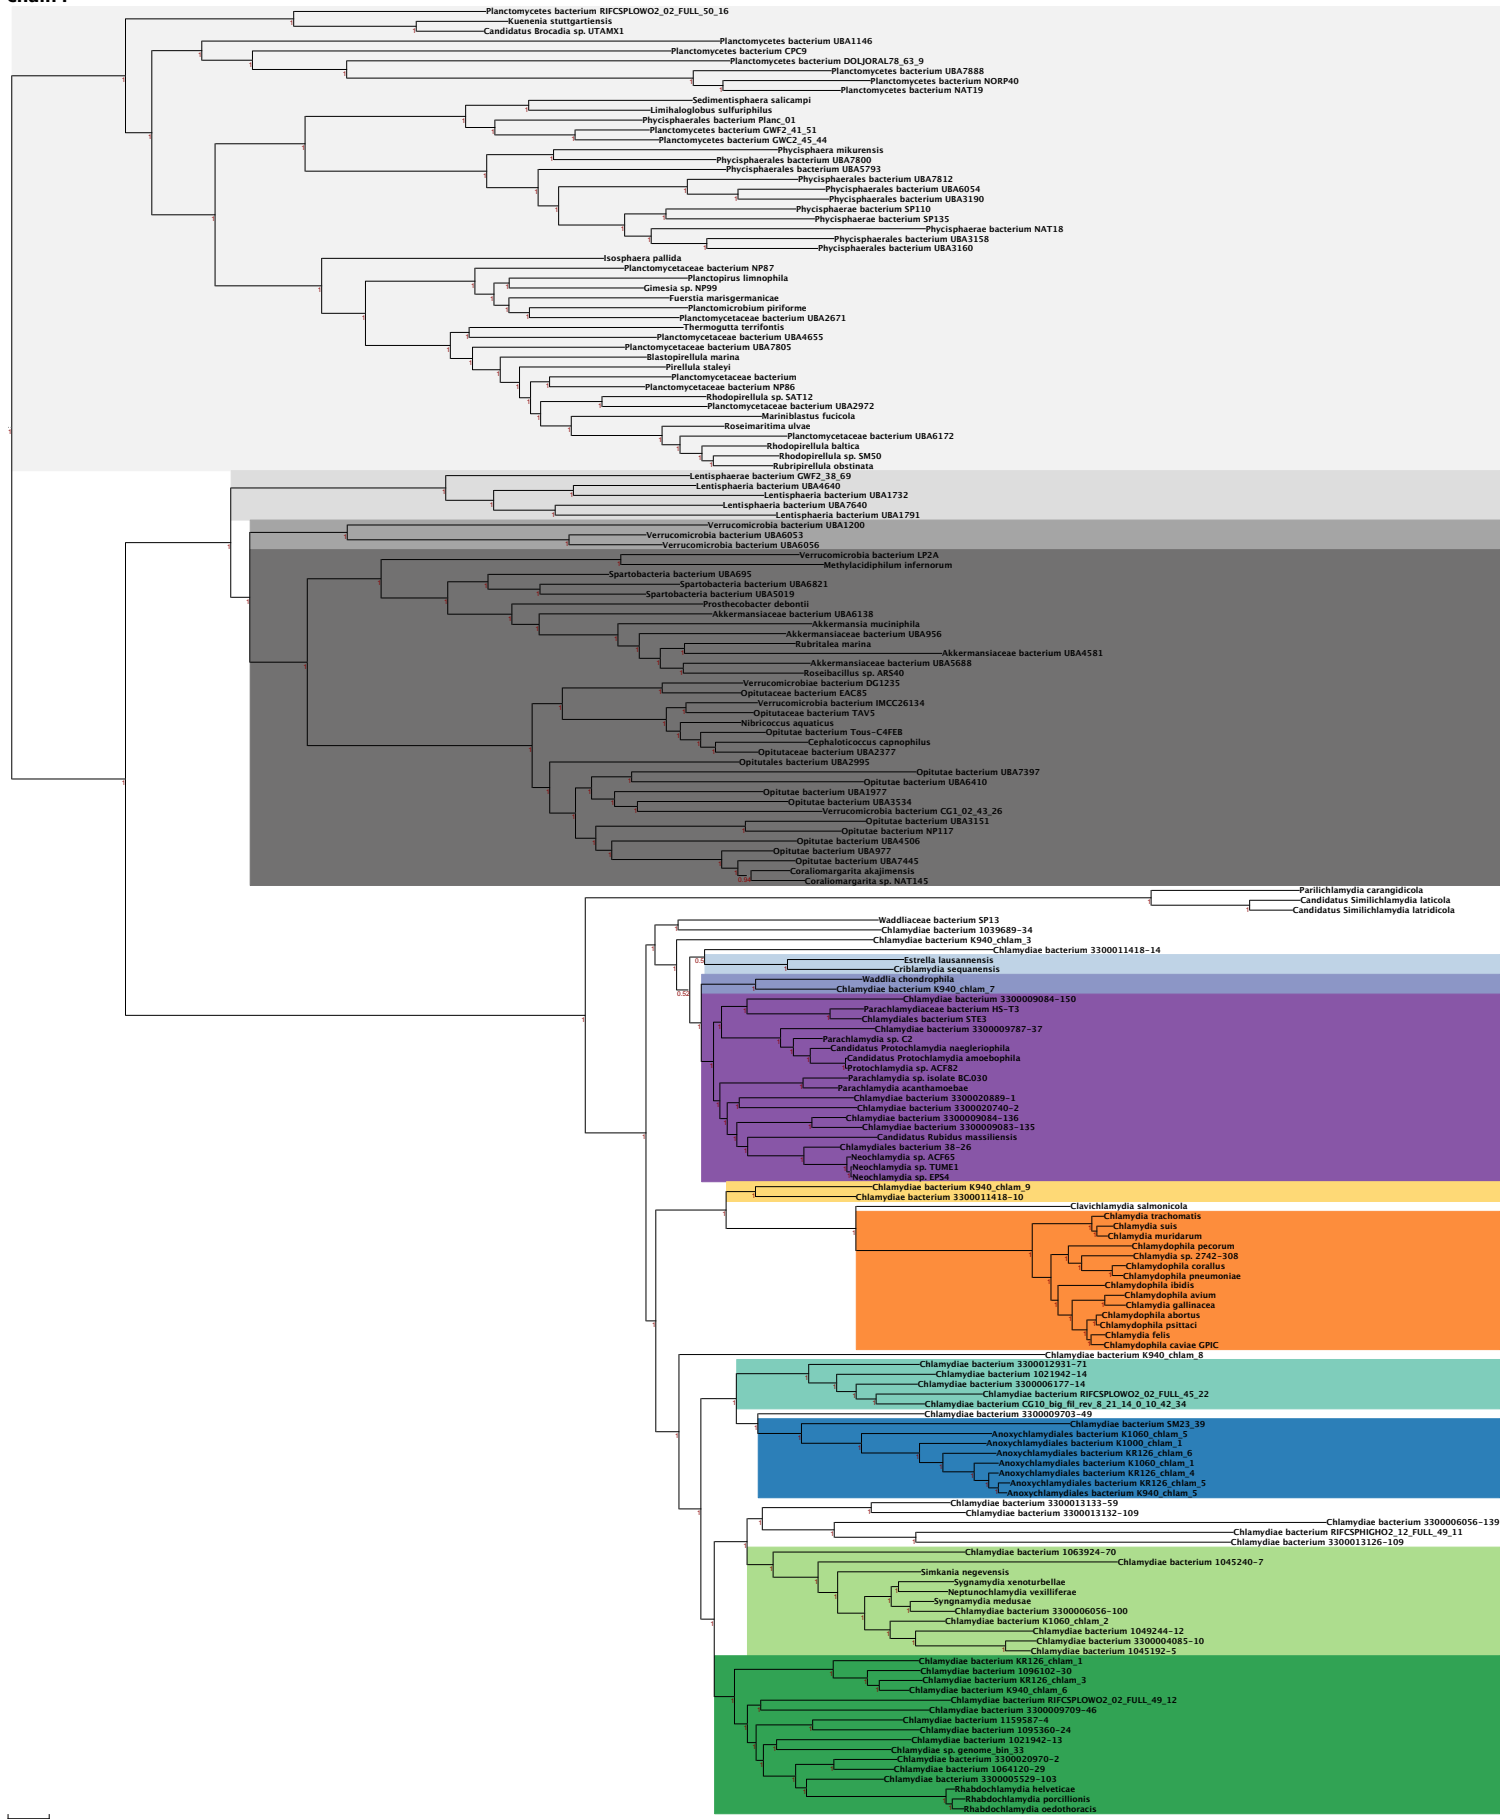

0.1

convergence\_chains\_1234

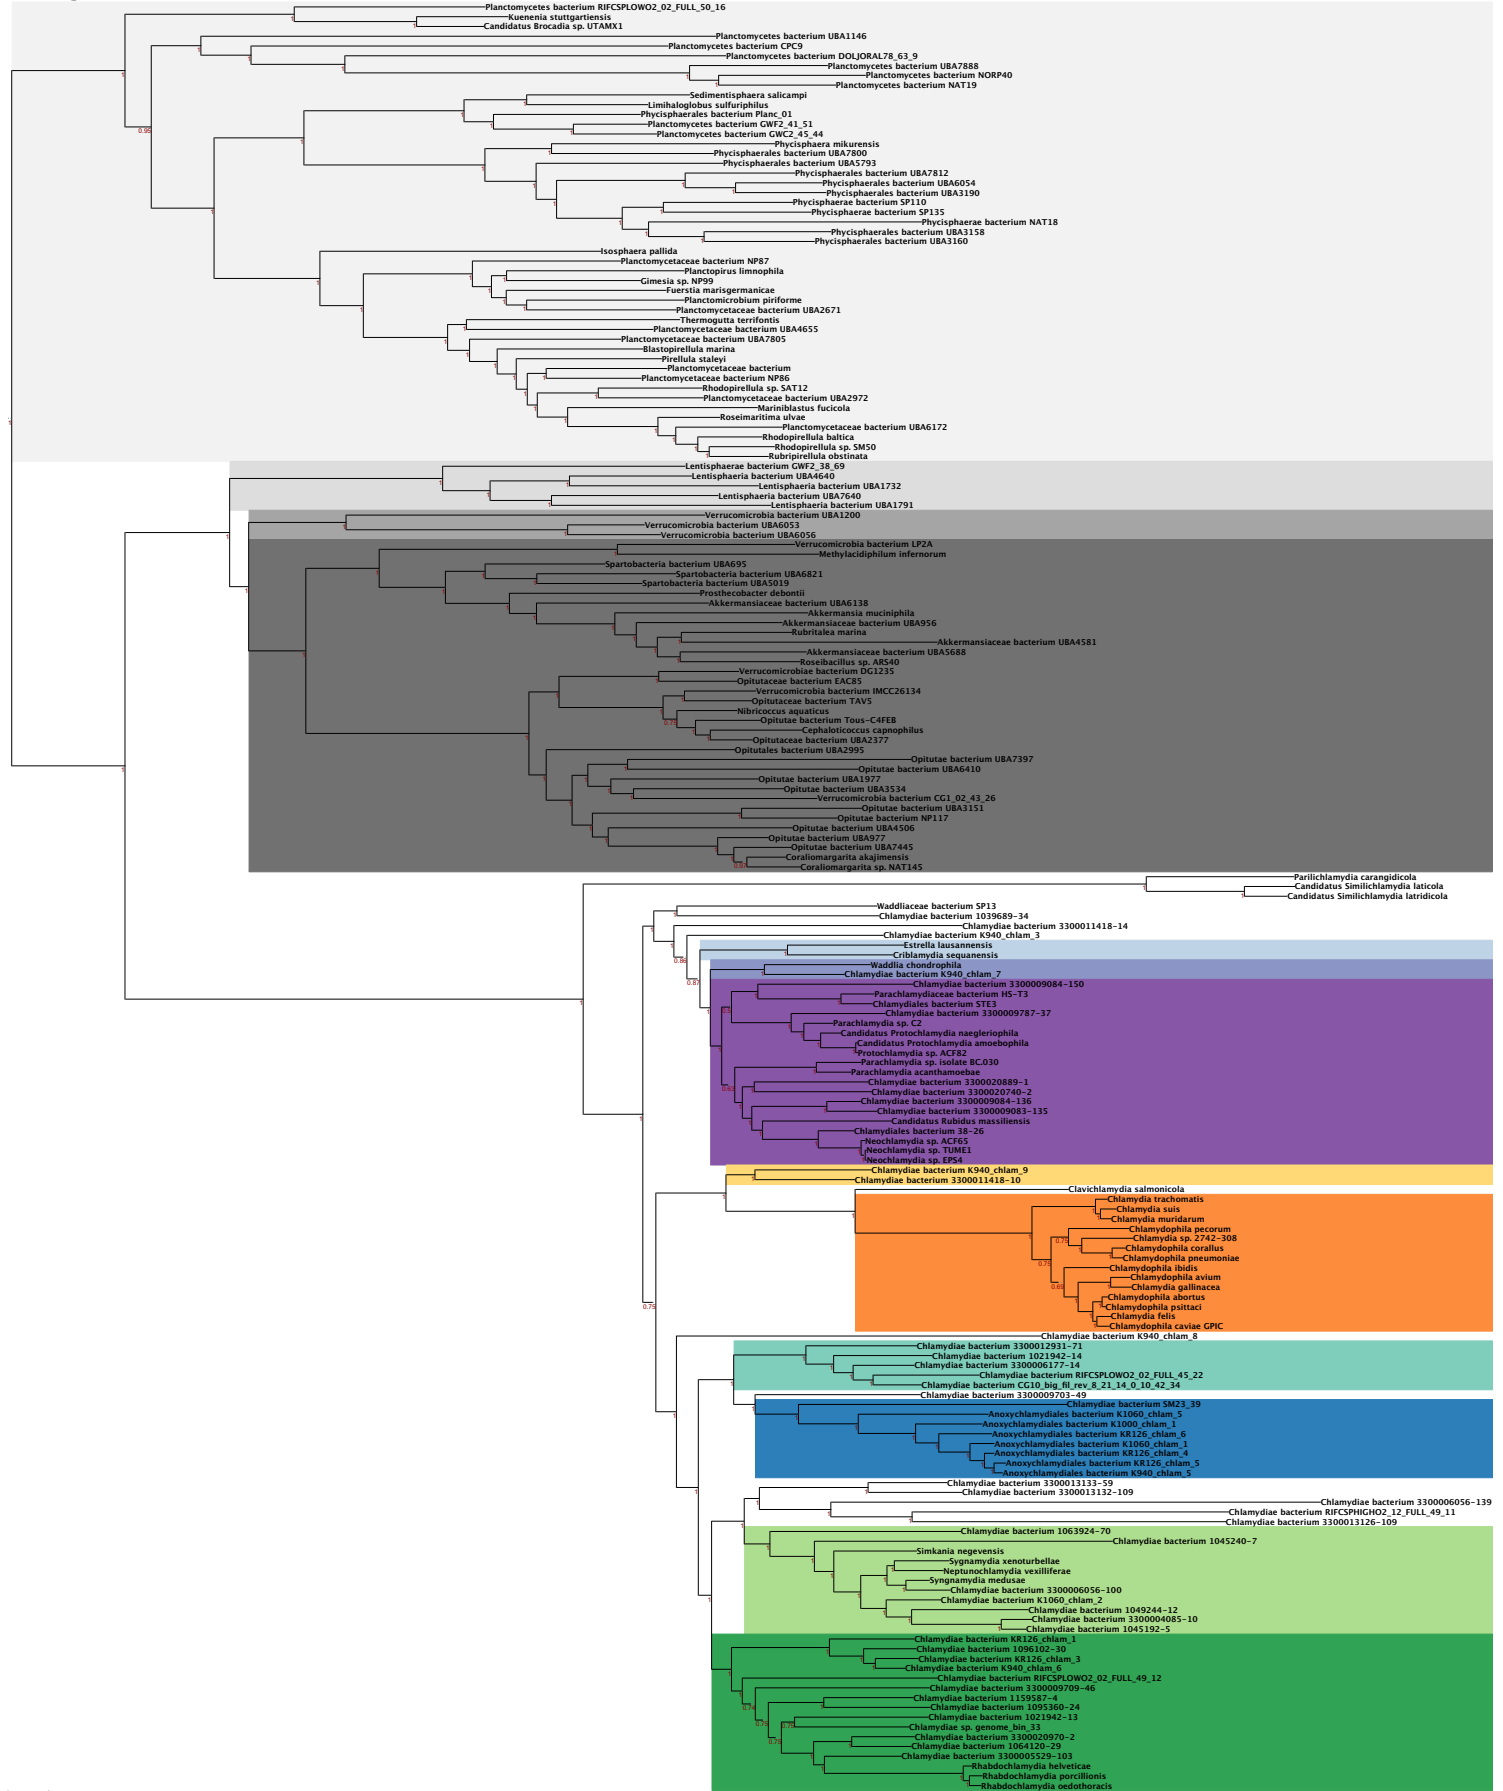

0.1

183taxa\_10perc\_pruned

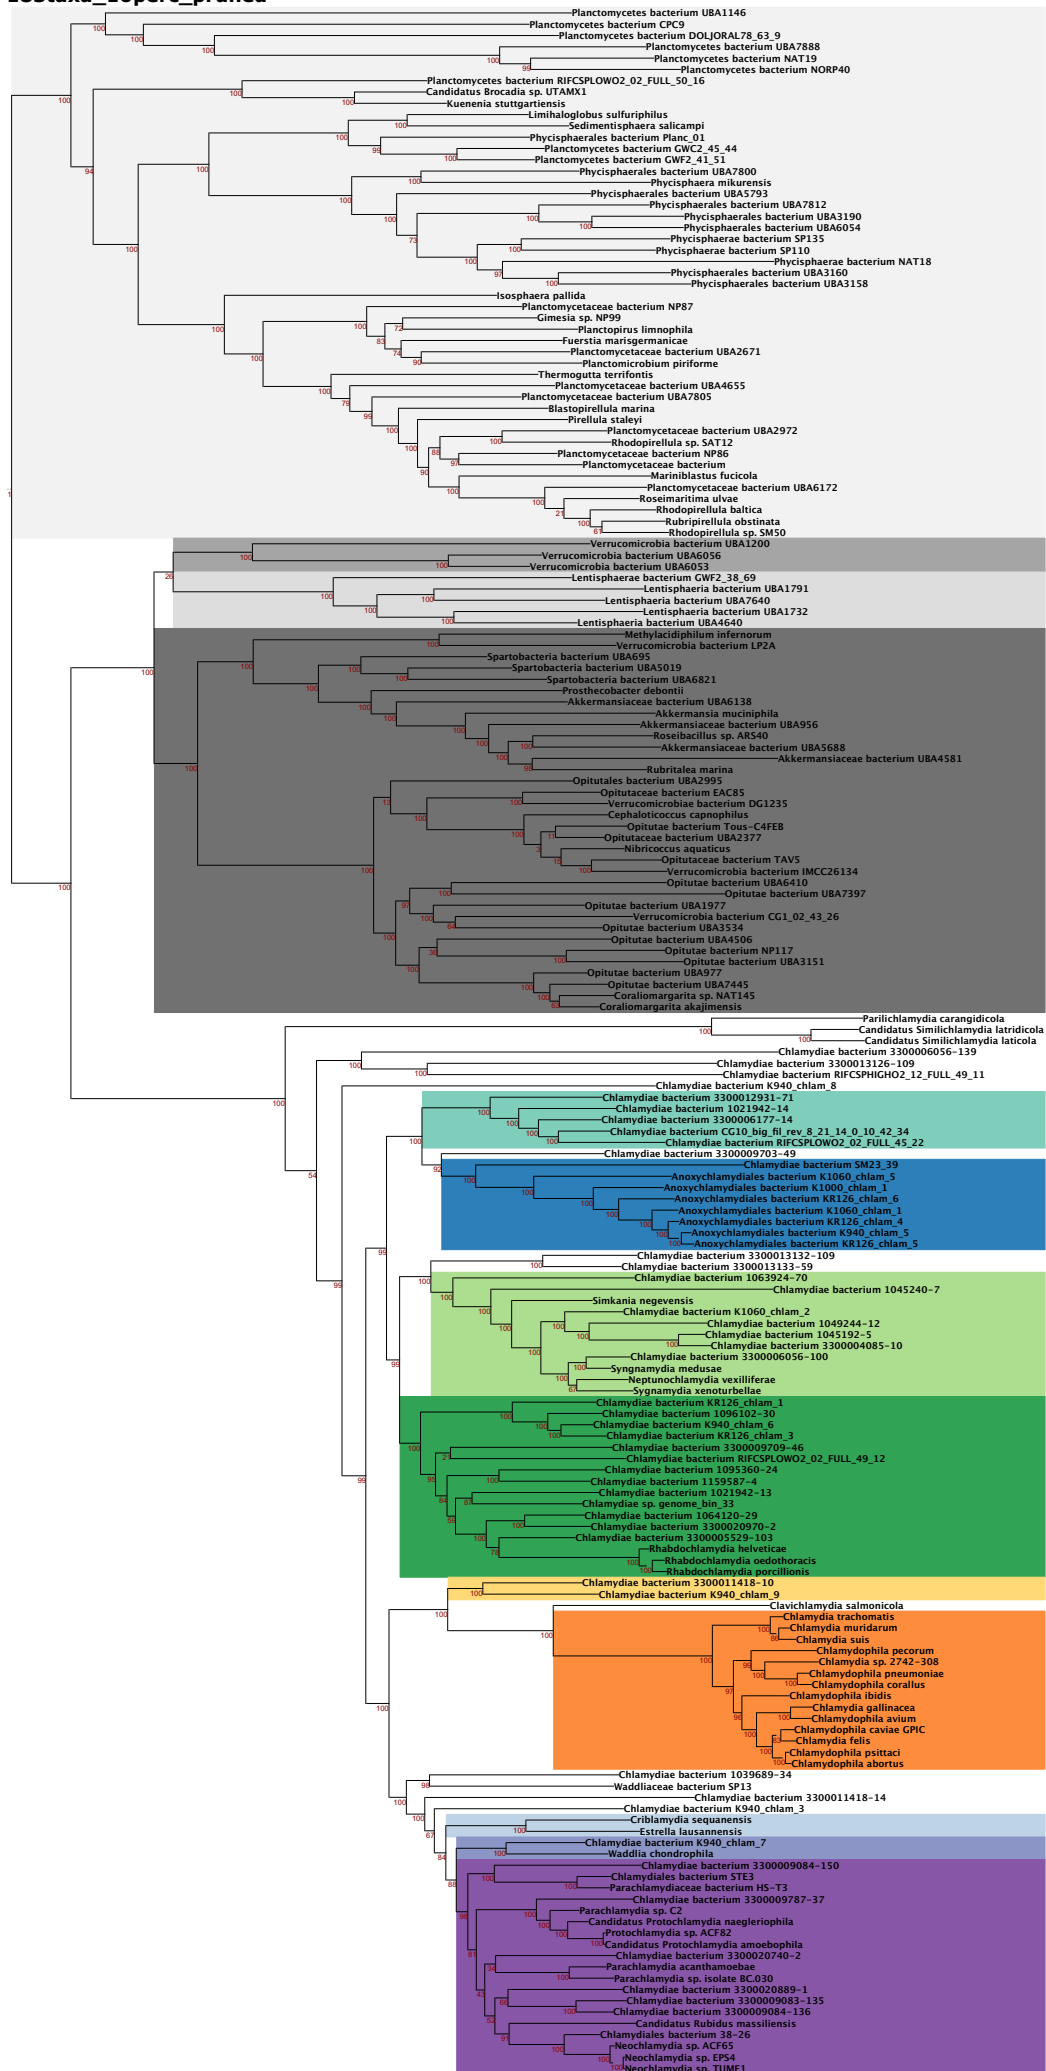

0.1

183taxa\_20perc\_pruned

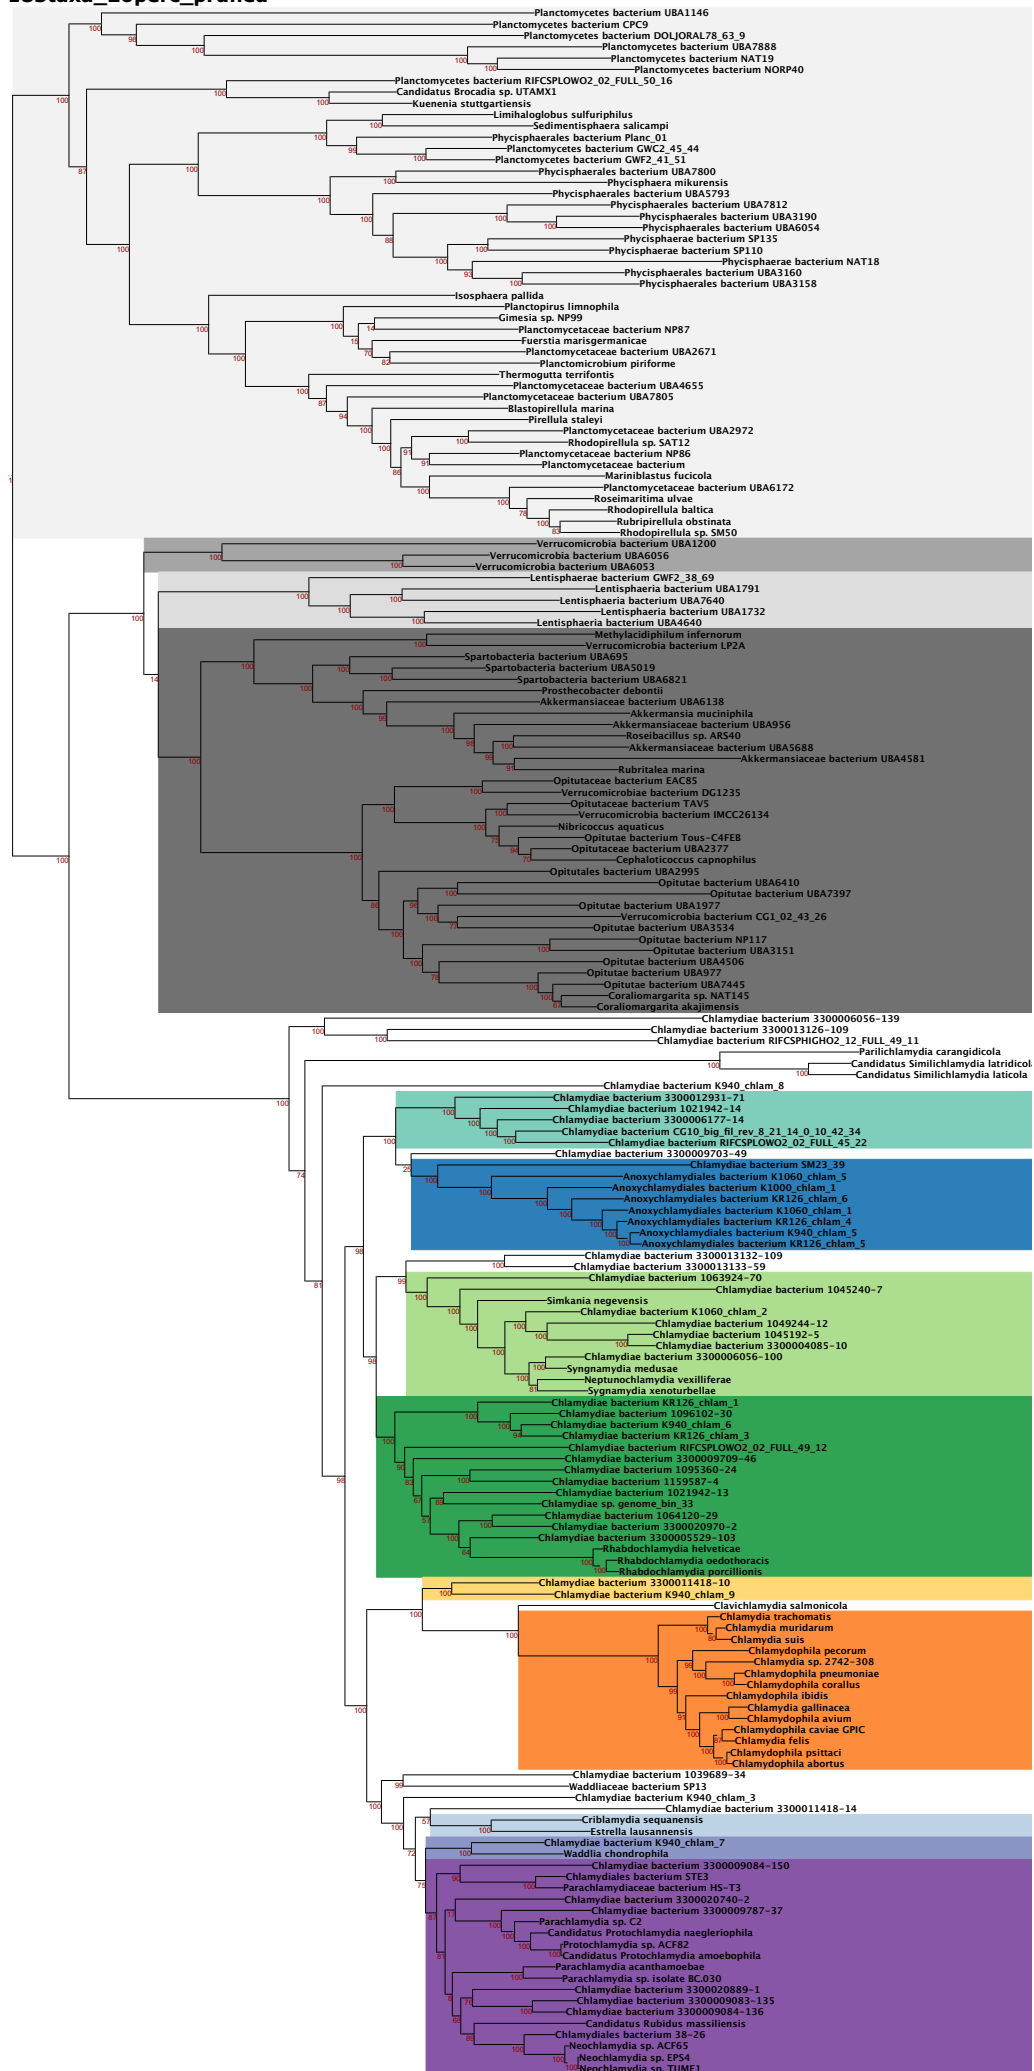

0.1

183taxa\_30perc\_pruned

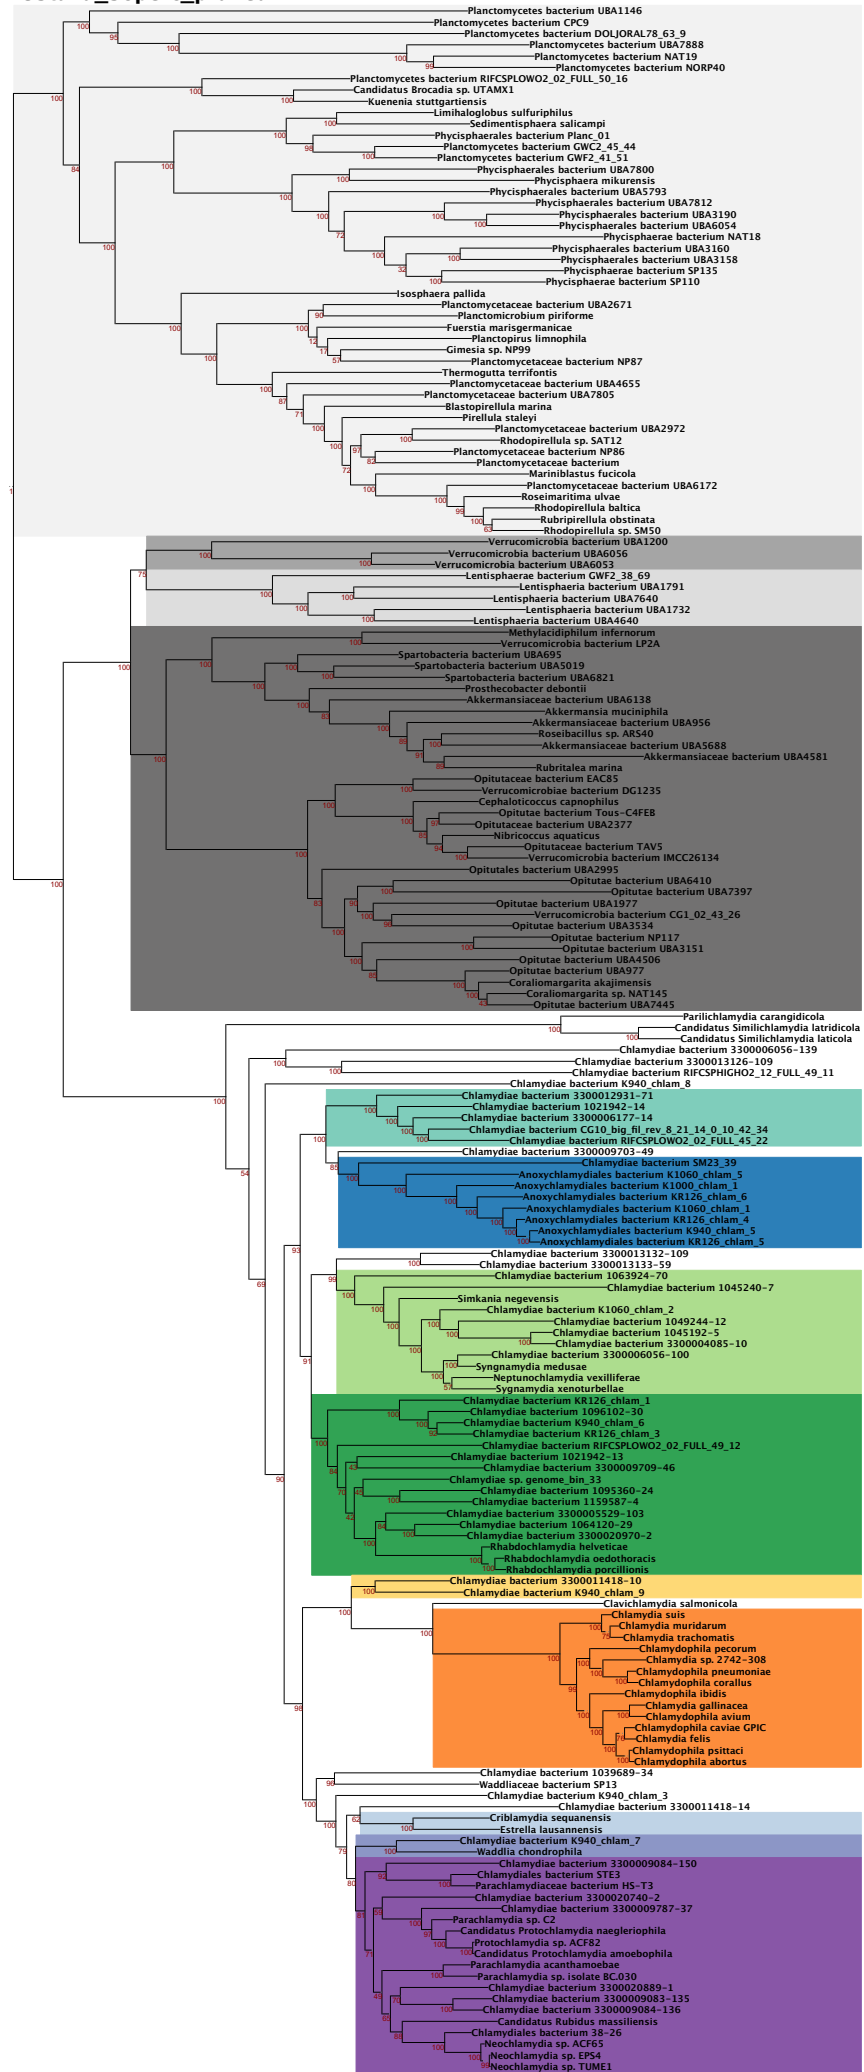

0.1

183taxa\_40perc\_pruned

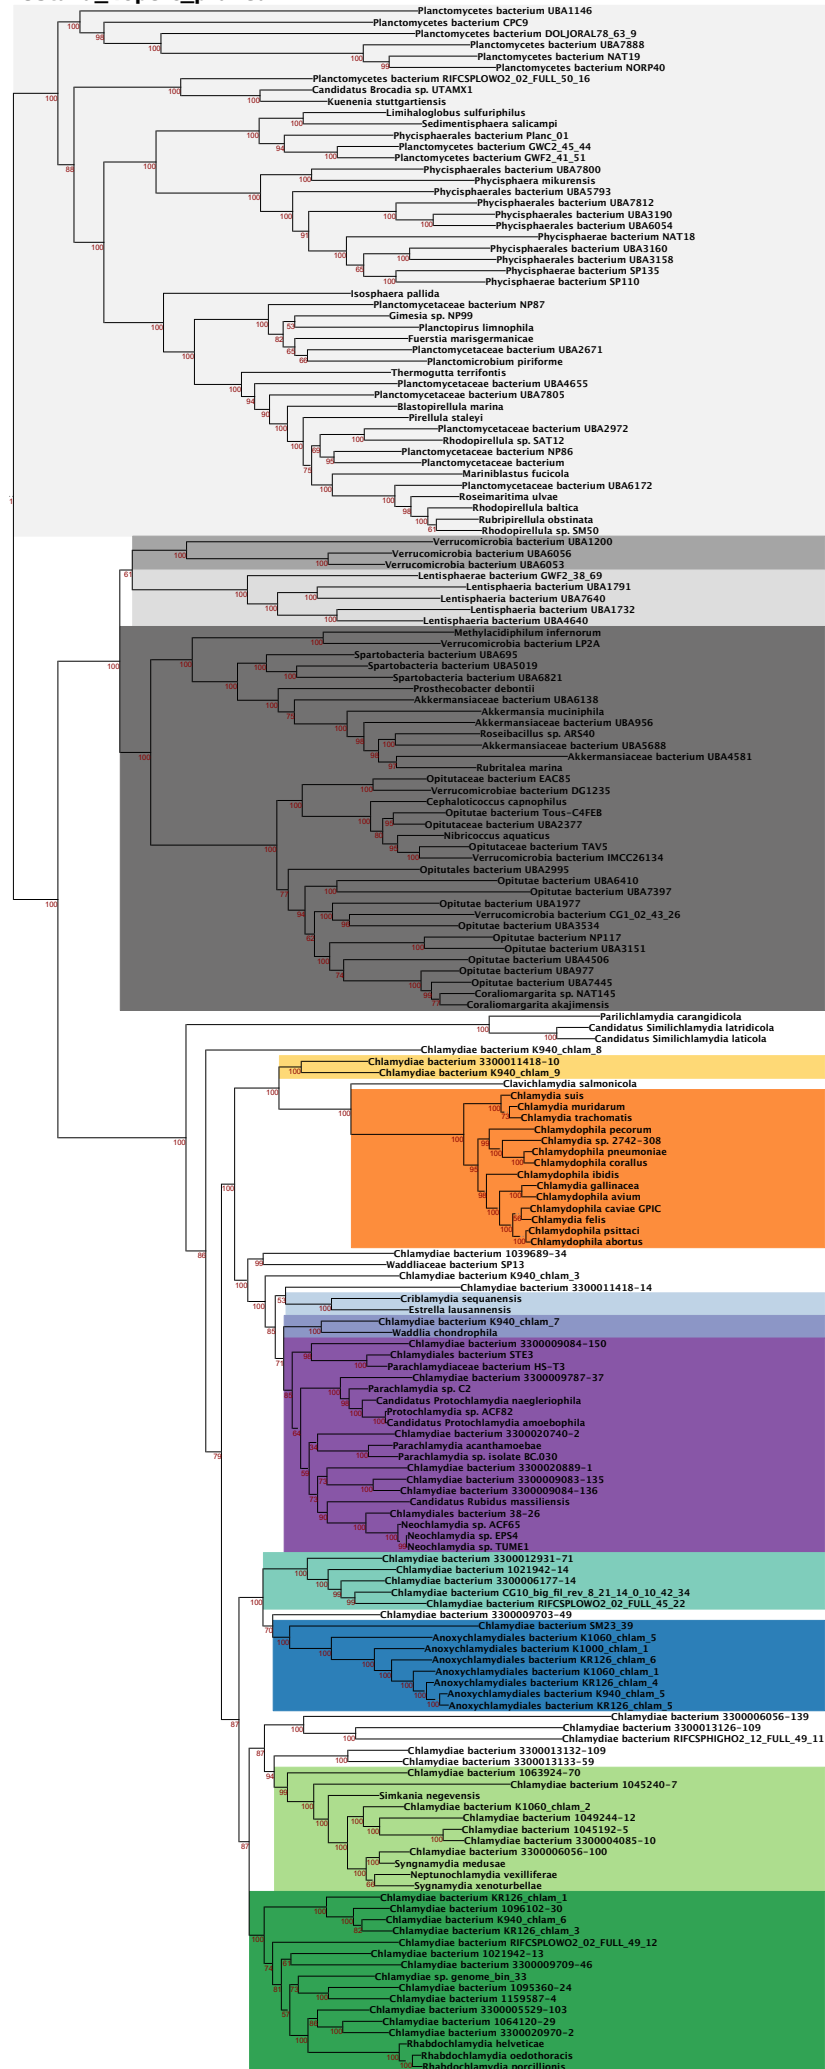

0.1

183taxa\_48perc\_pruned\_bias\_removed

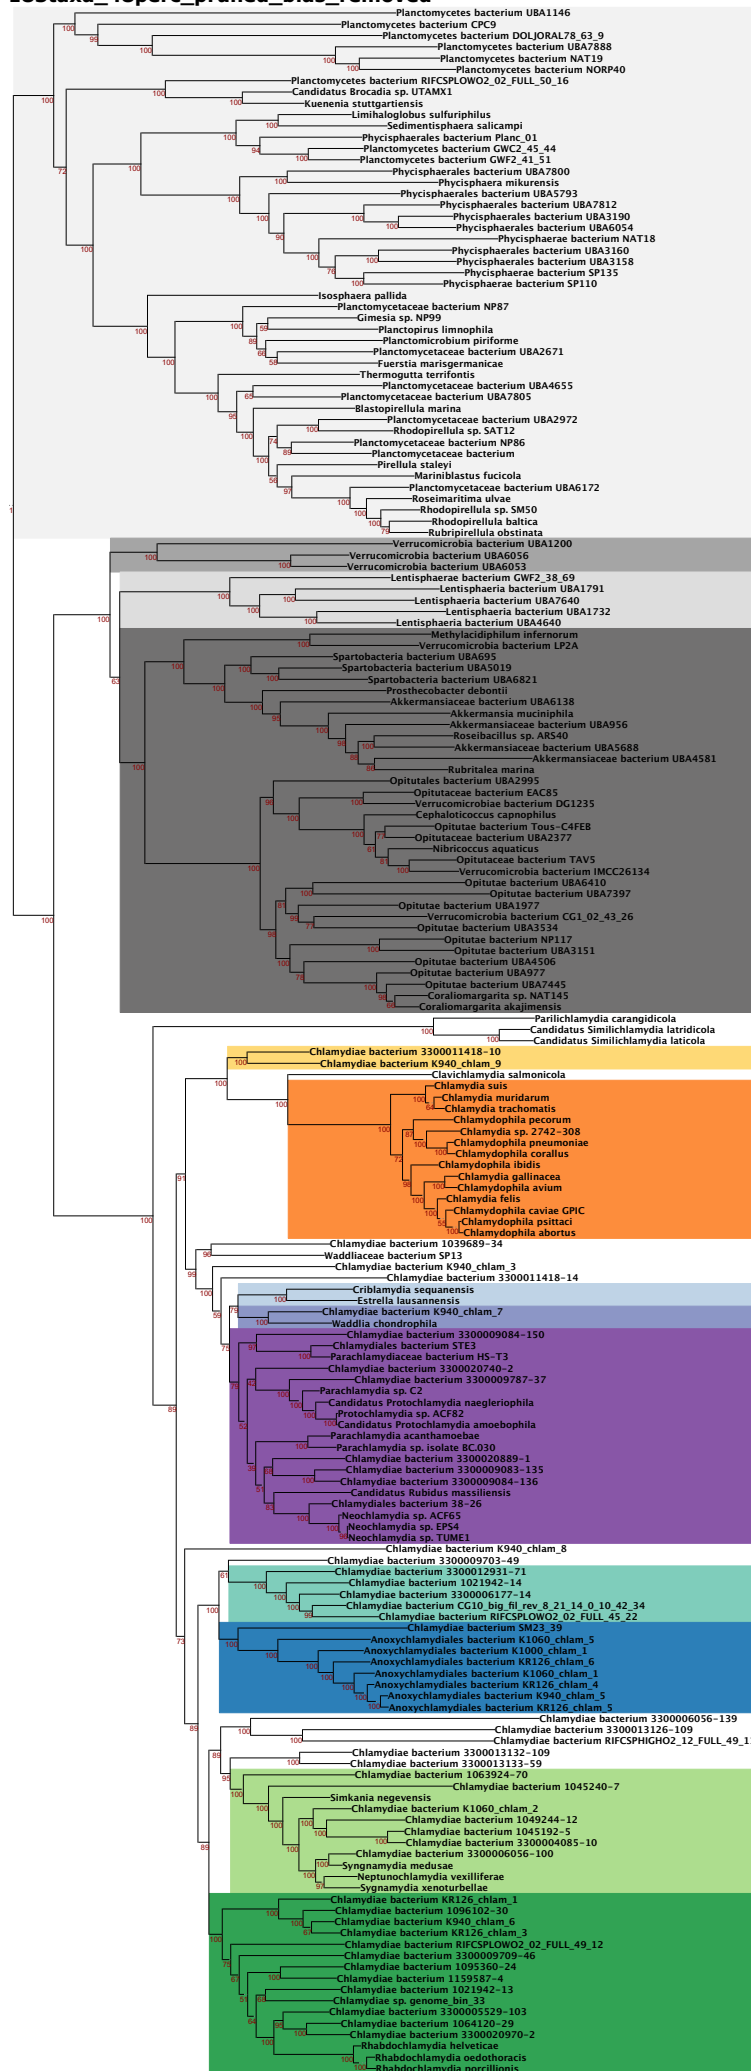

0.1



183taxa\_48perc\_pruned\_bias\_removed

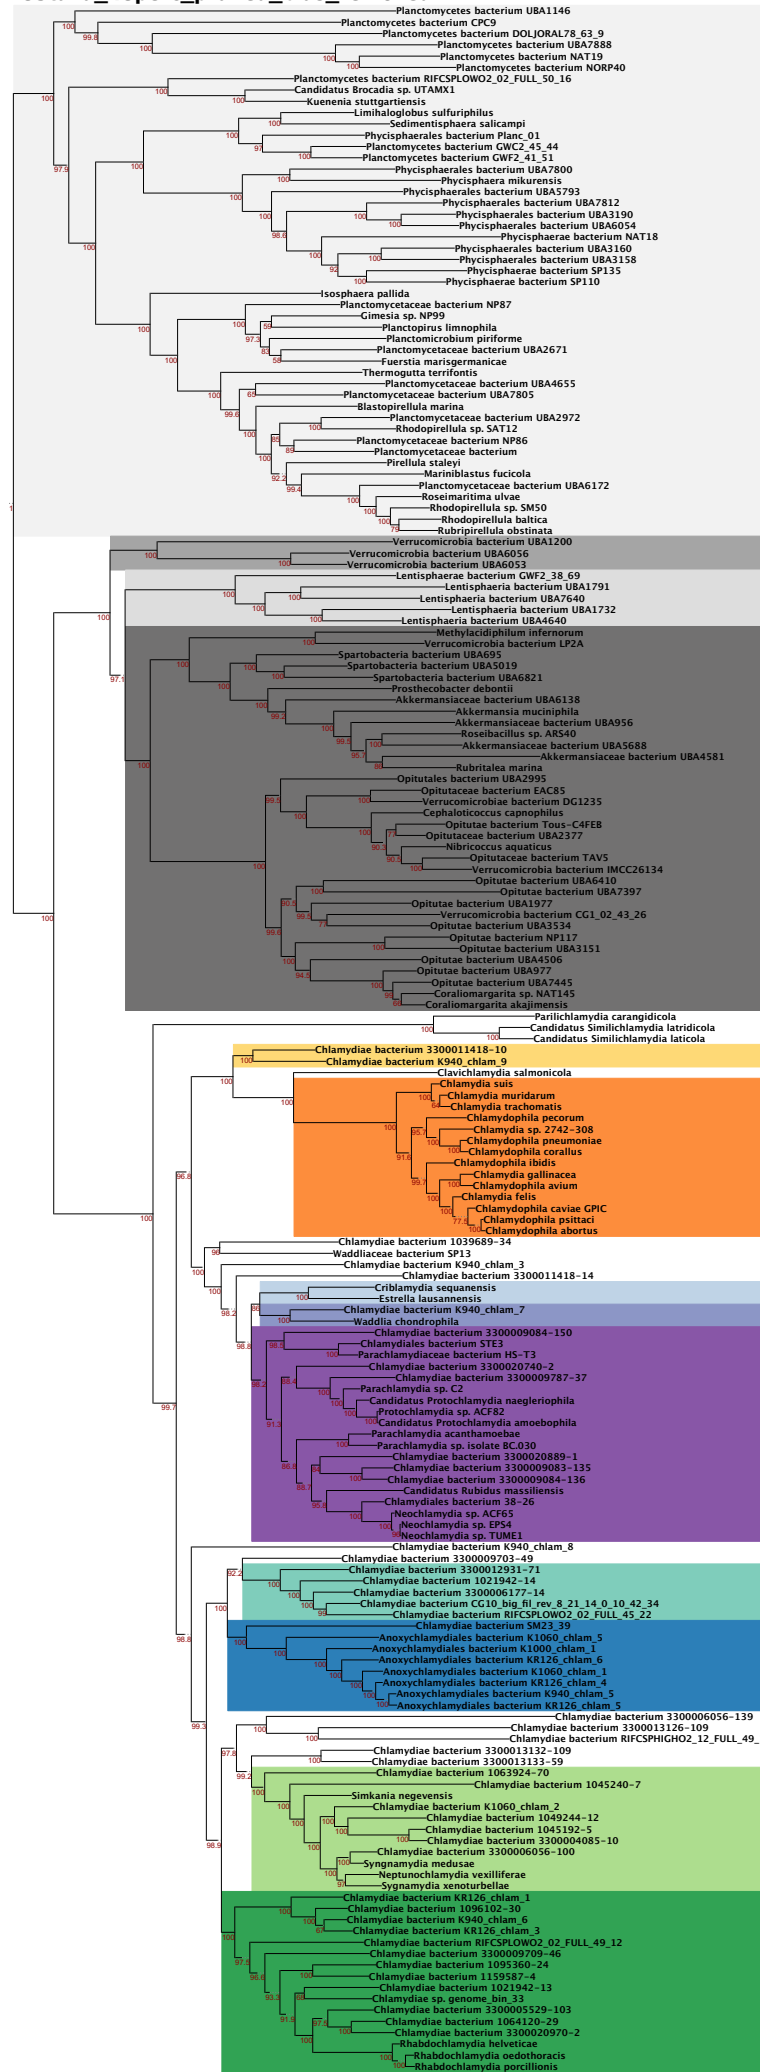



chain1

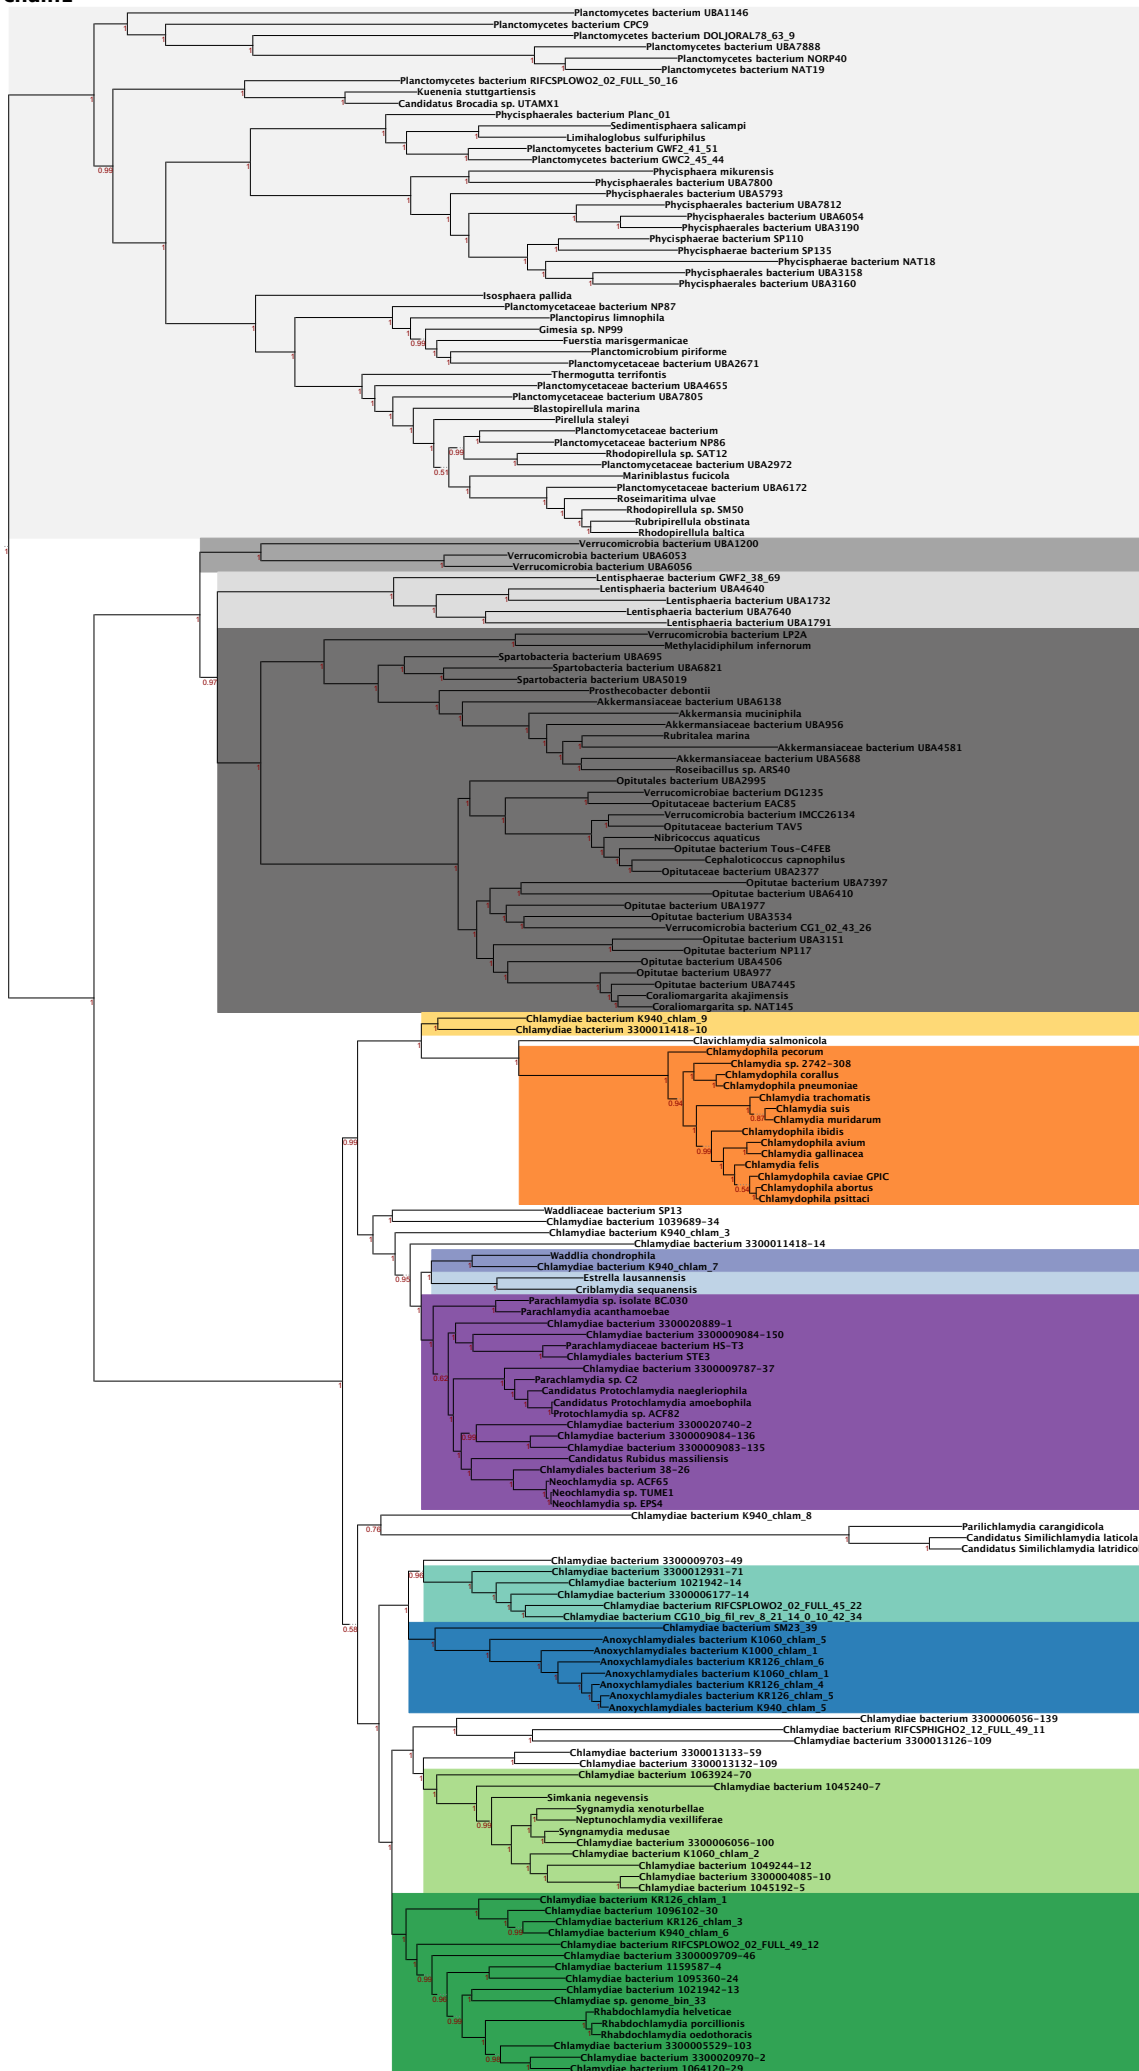

0.1



chain3

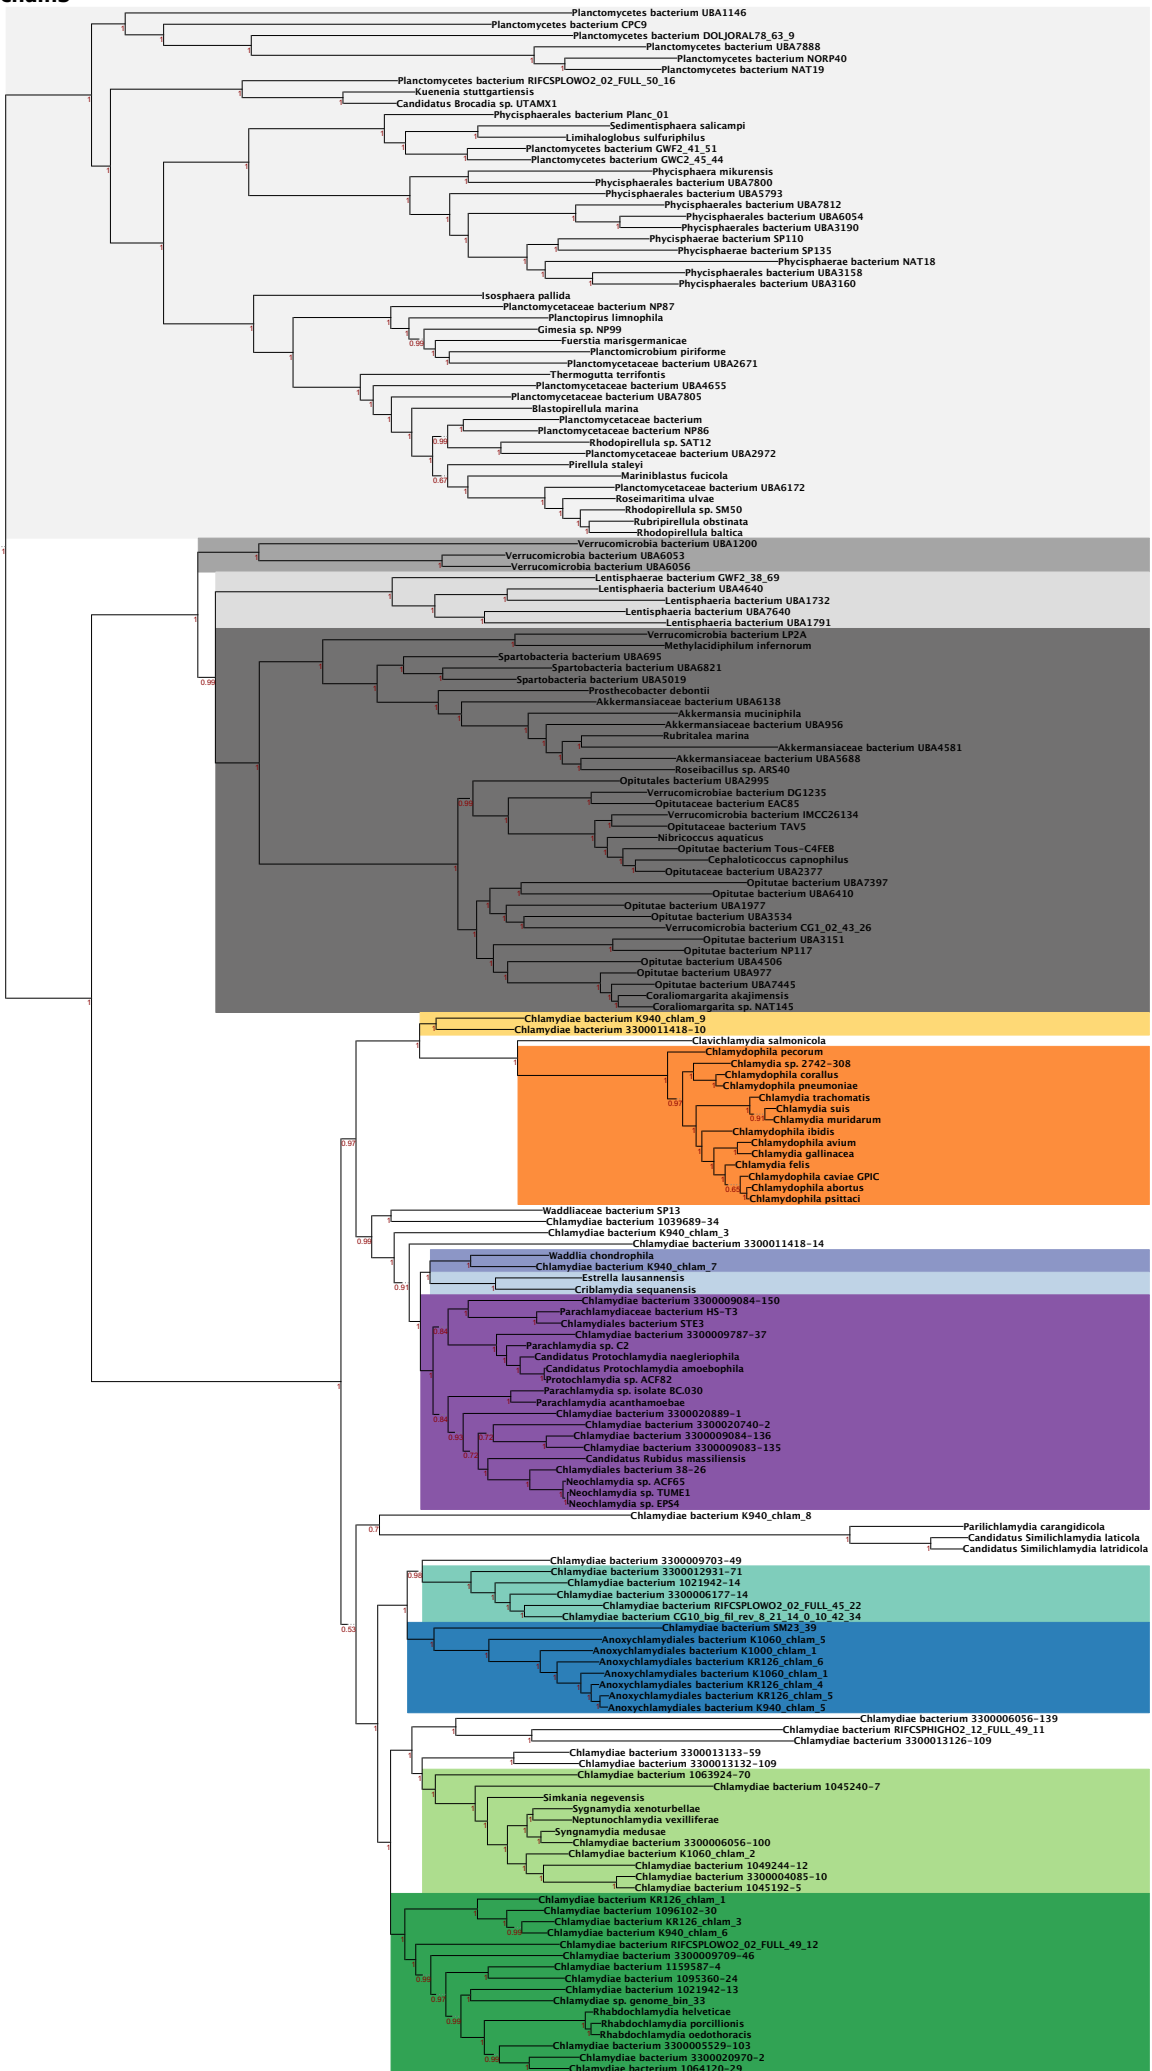

0.1



convergence\_chains\_1234

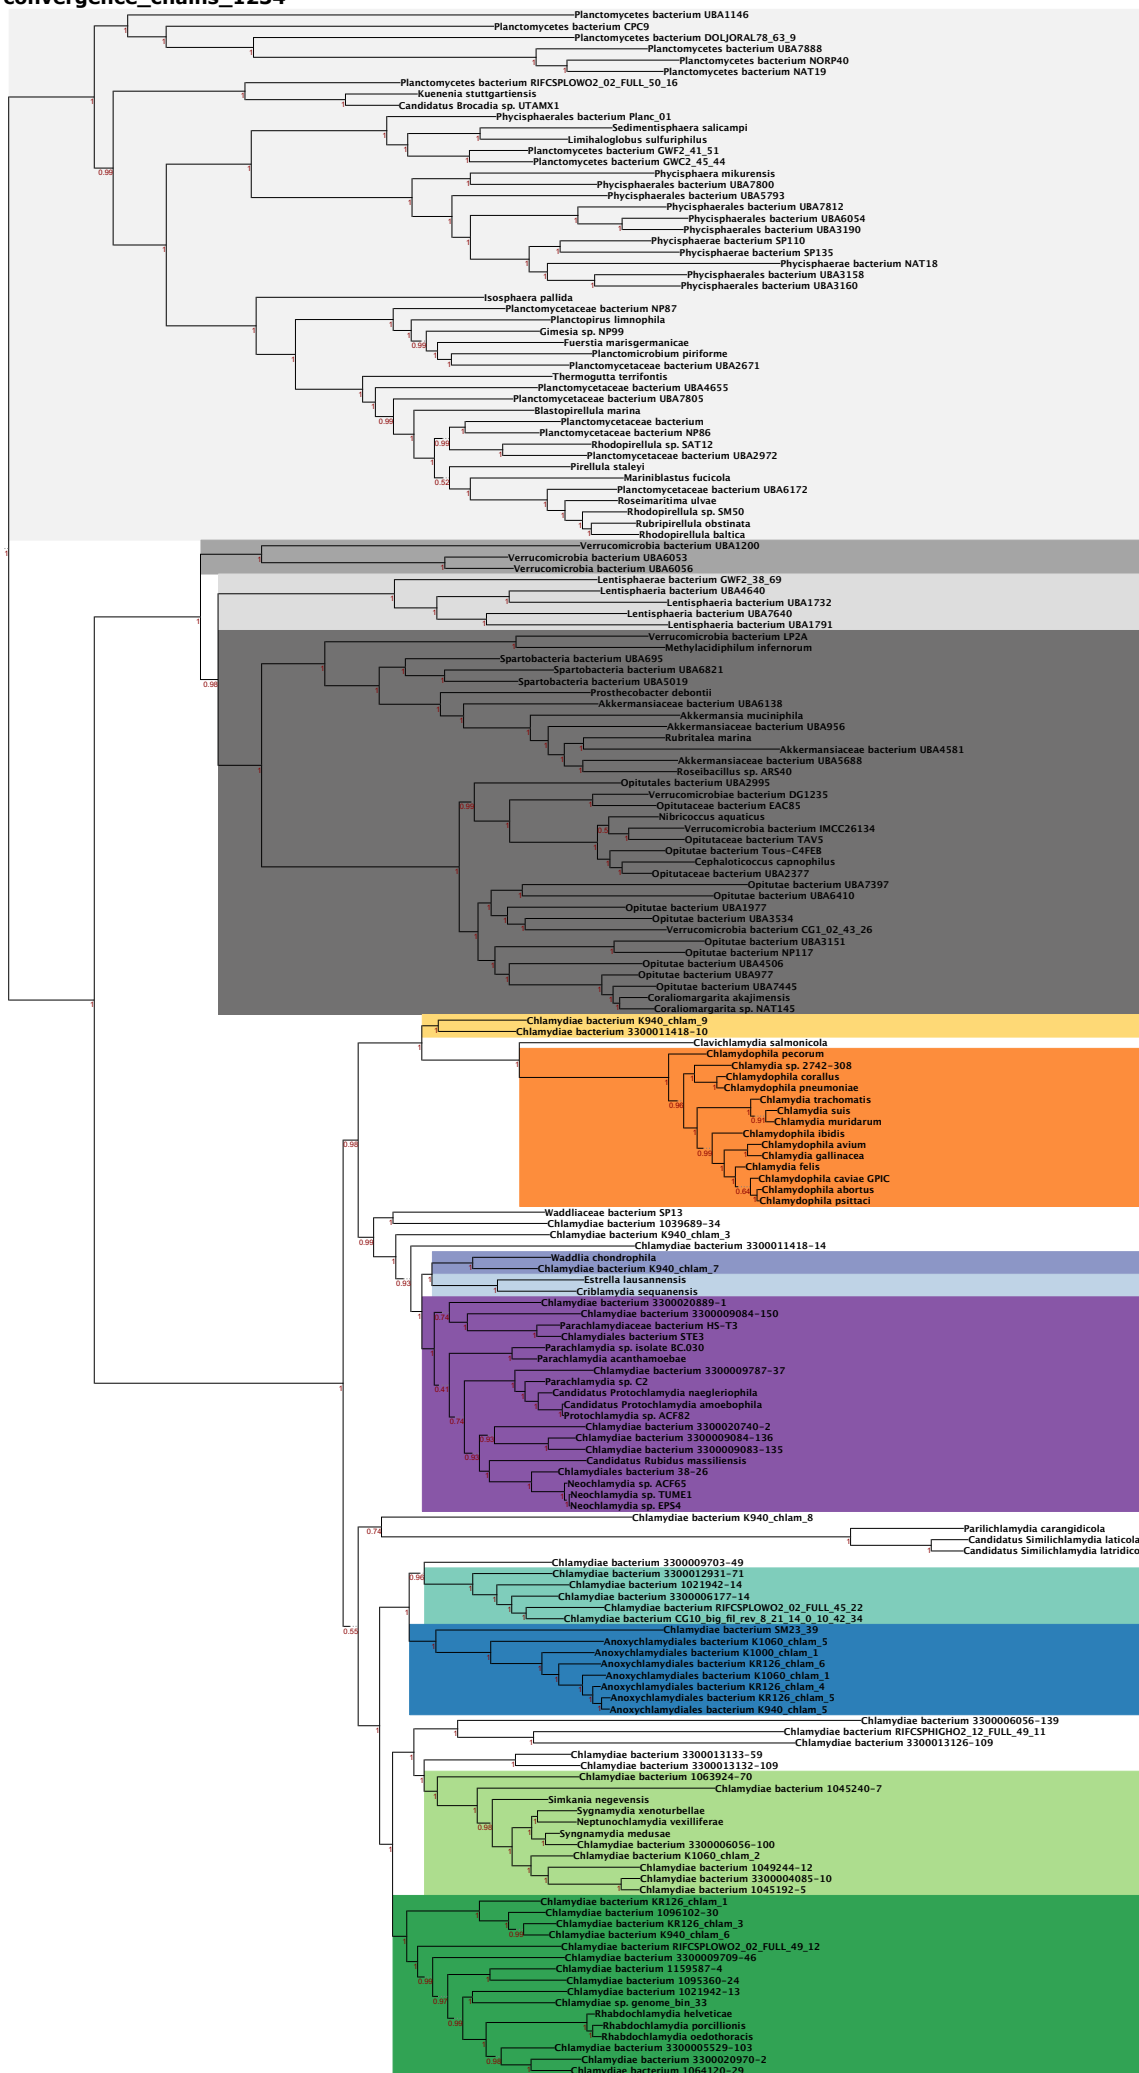



183taxa\_50perc\_pruned

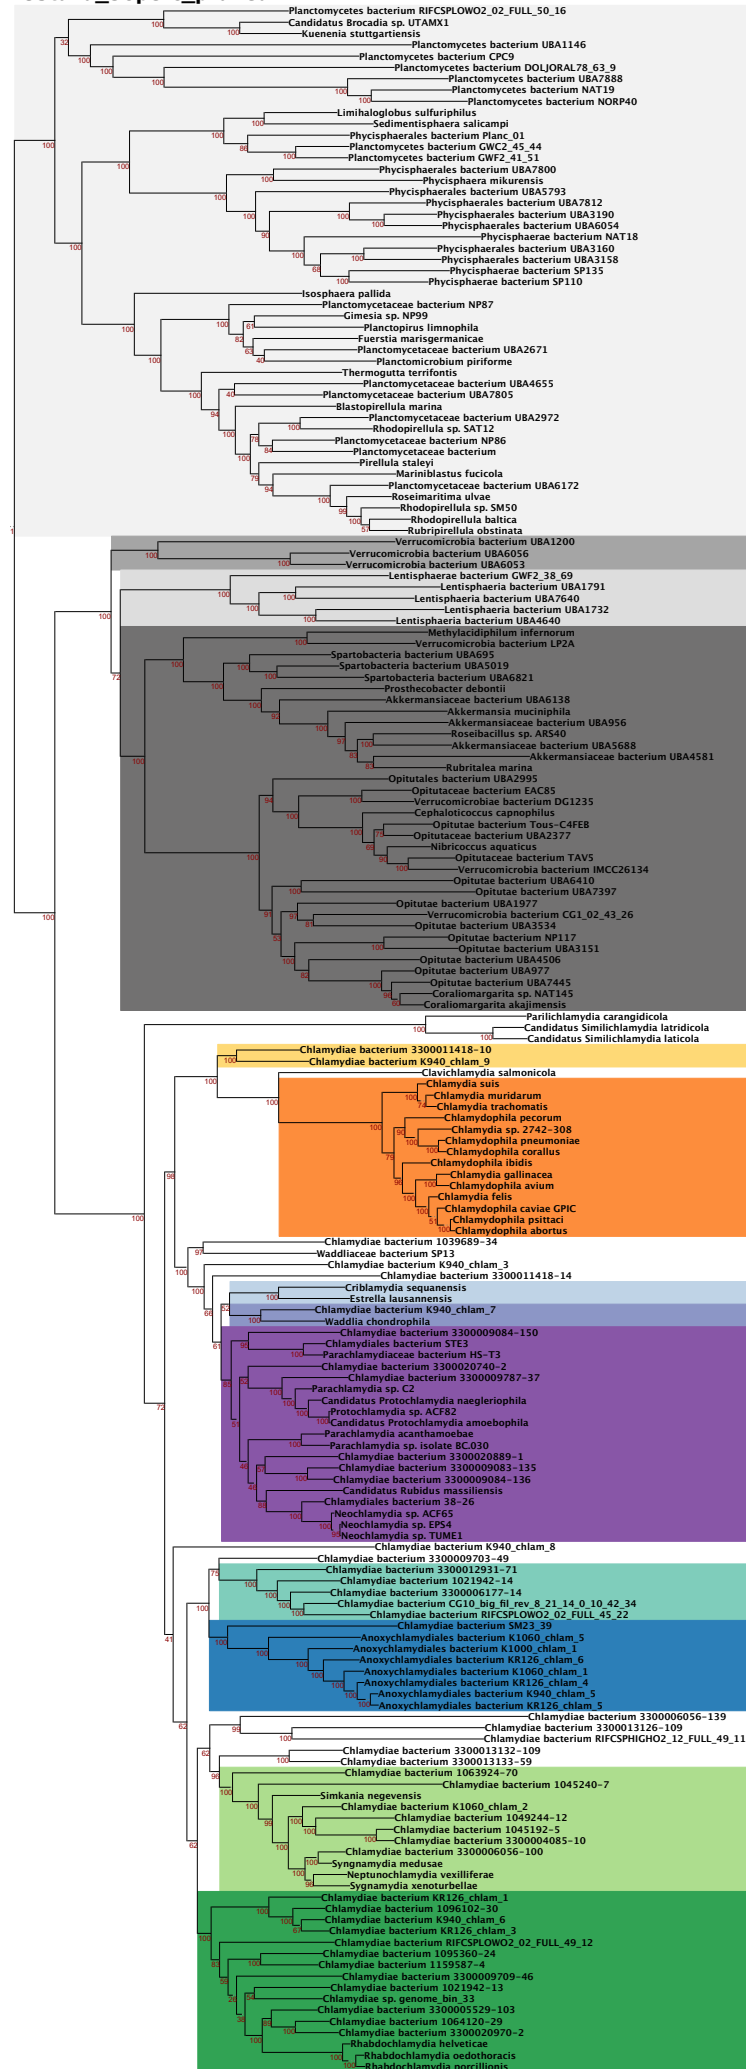

0.1



184taxa\_0perc\_pruned\_original

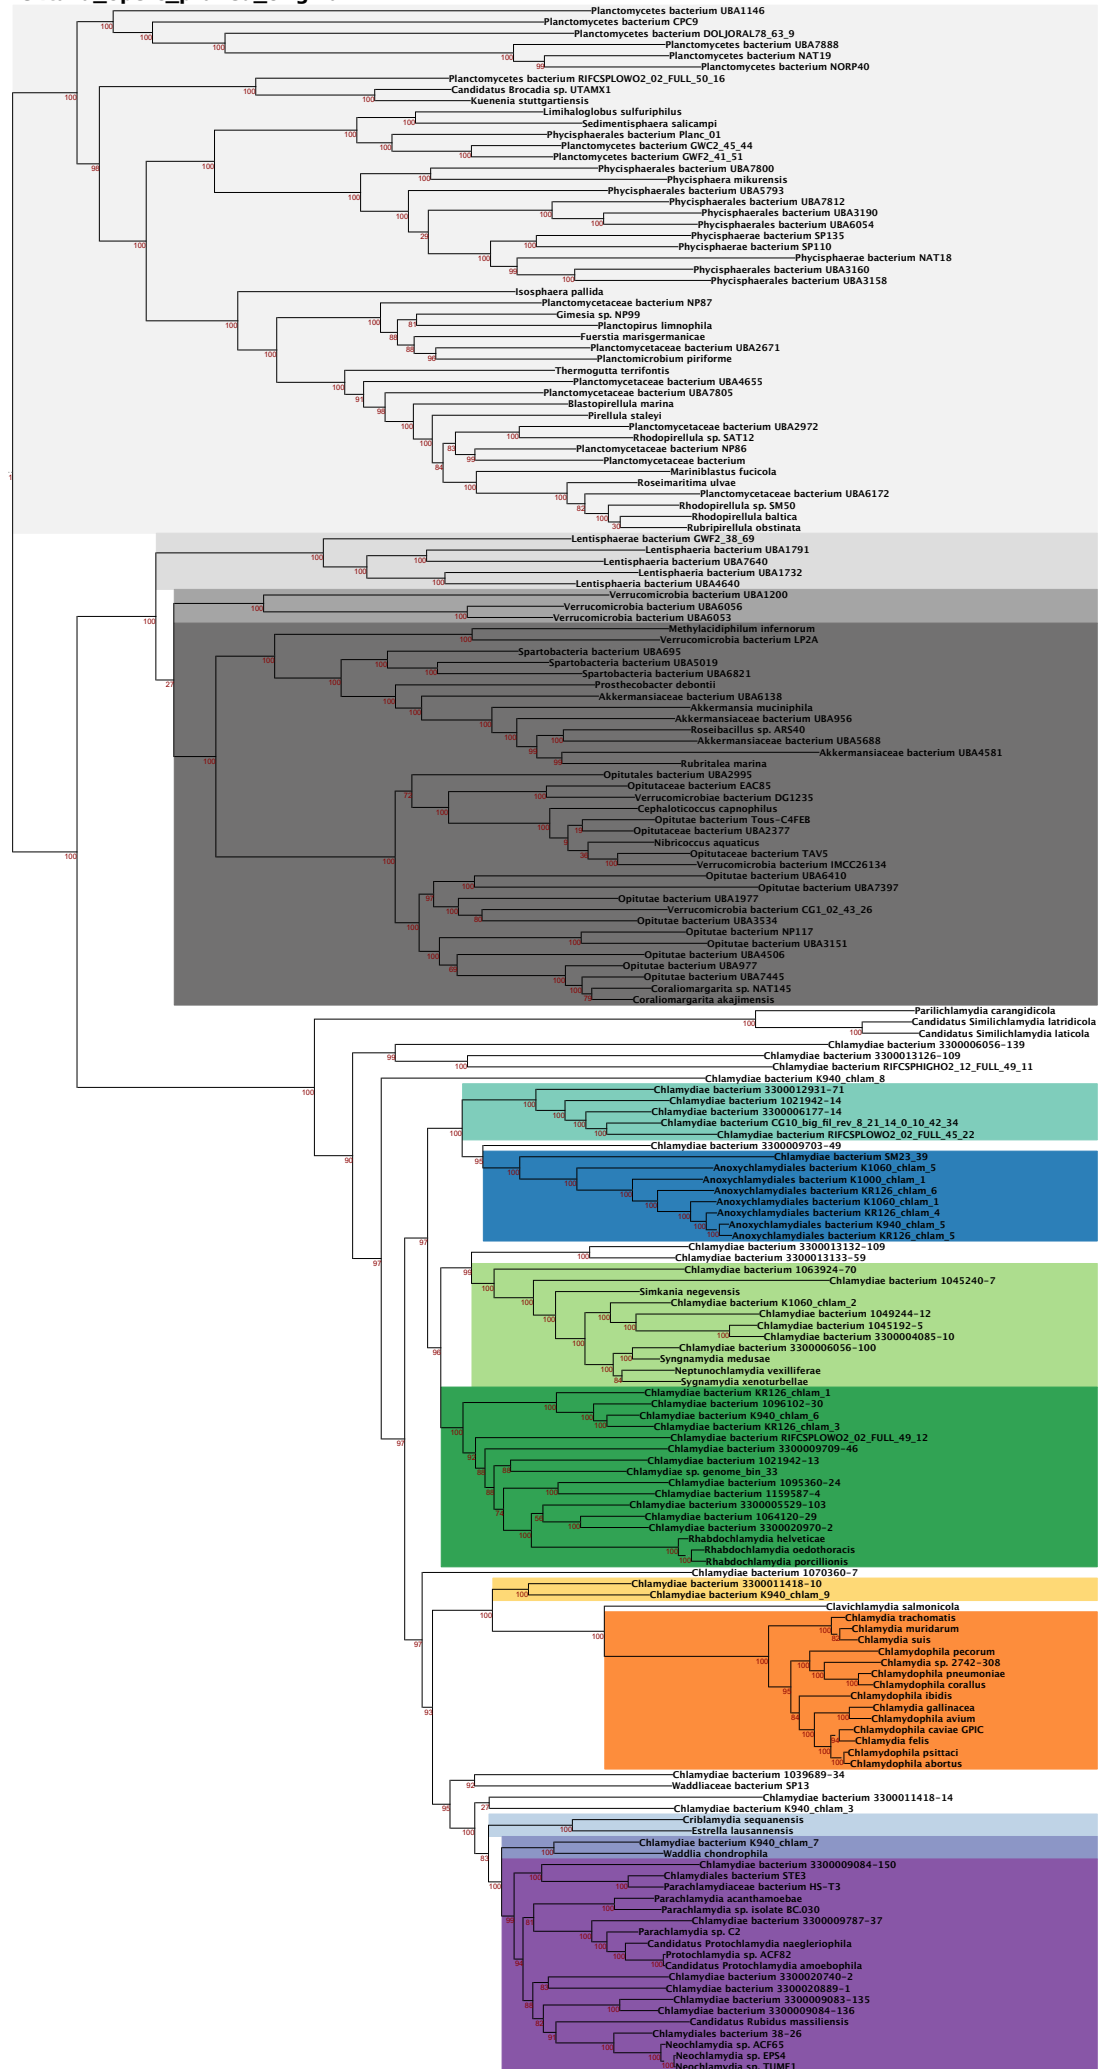



184taxa\_0perc\_pruned\_original

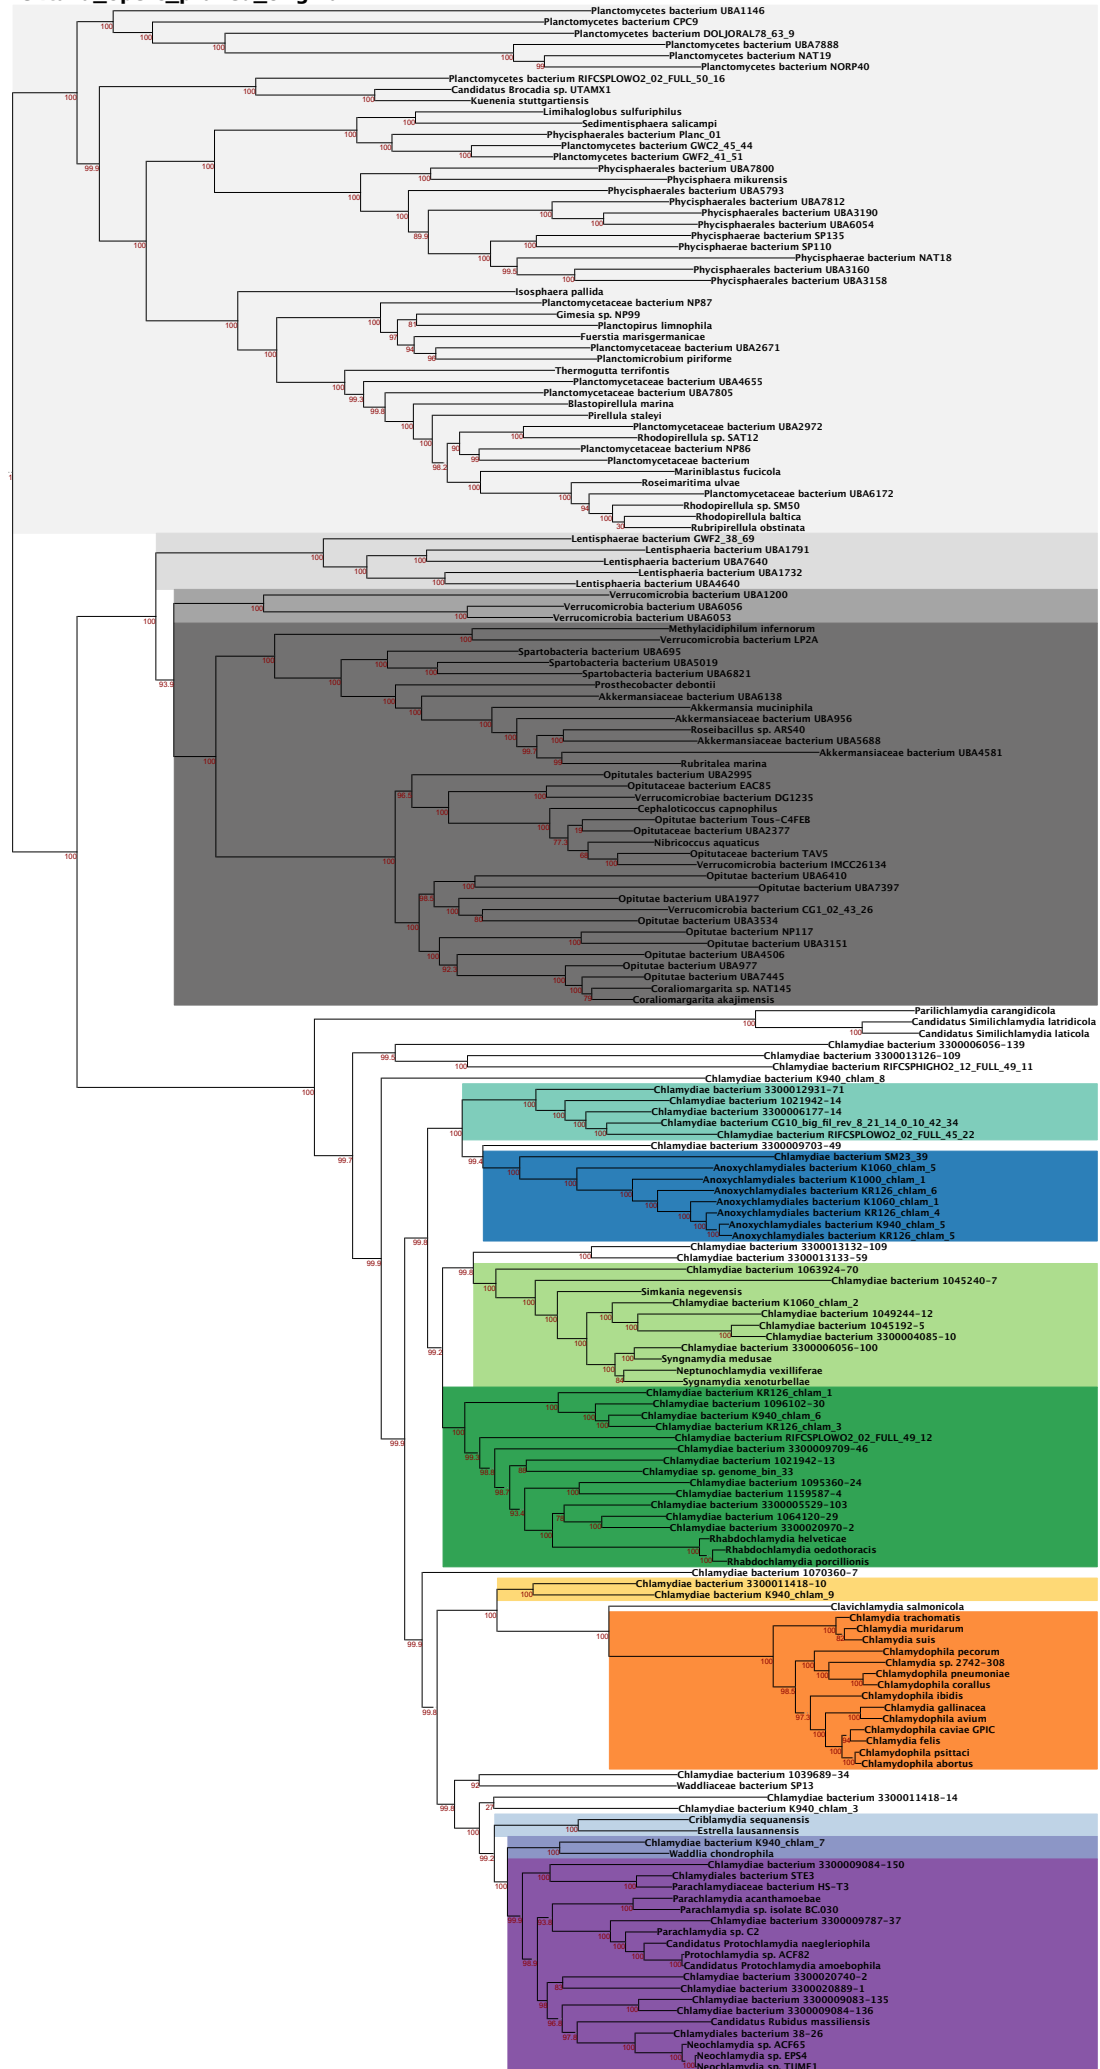

0.1

chain1

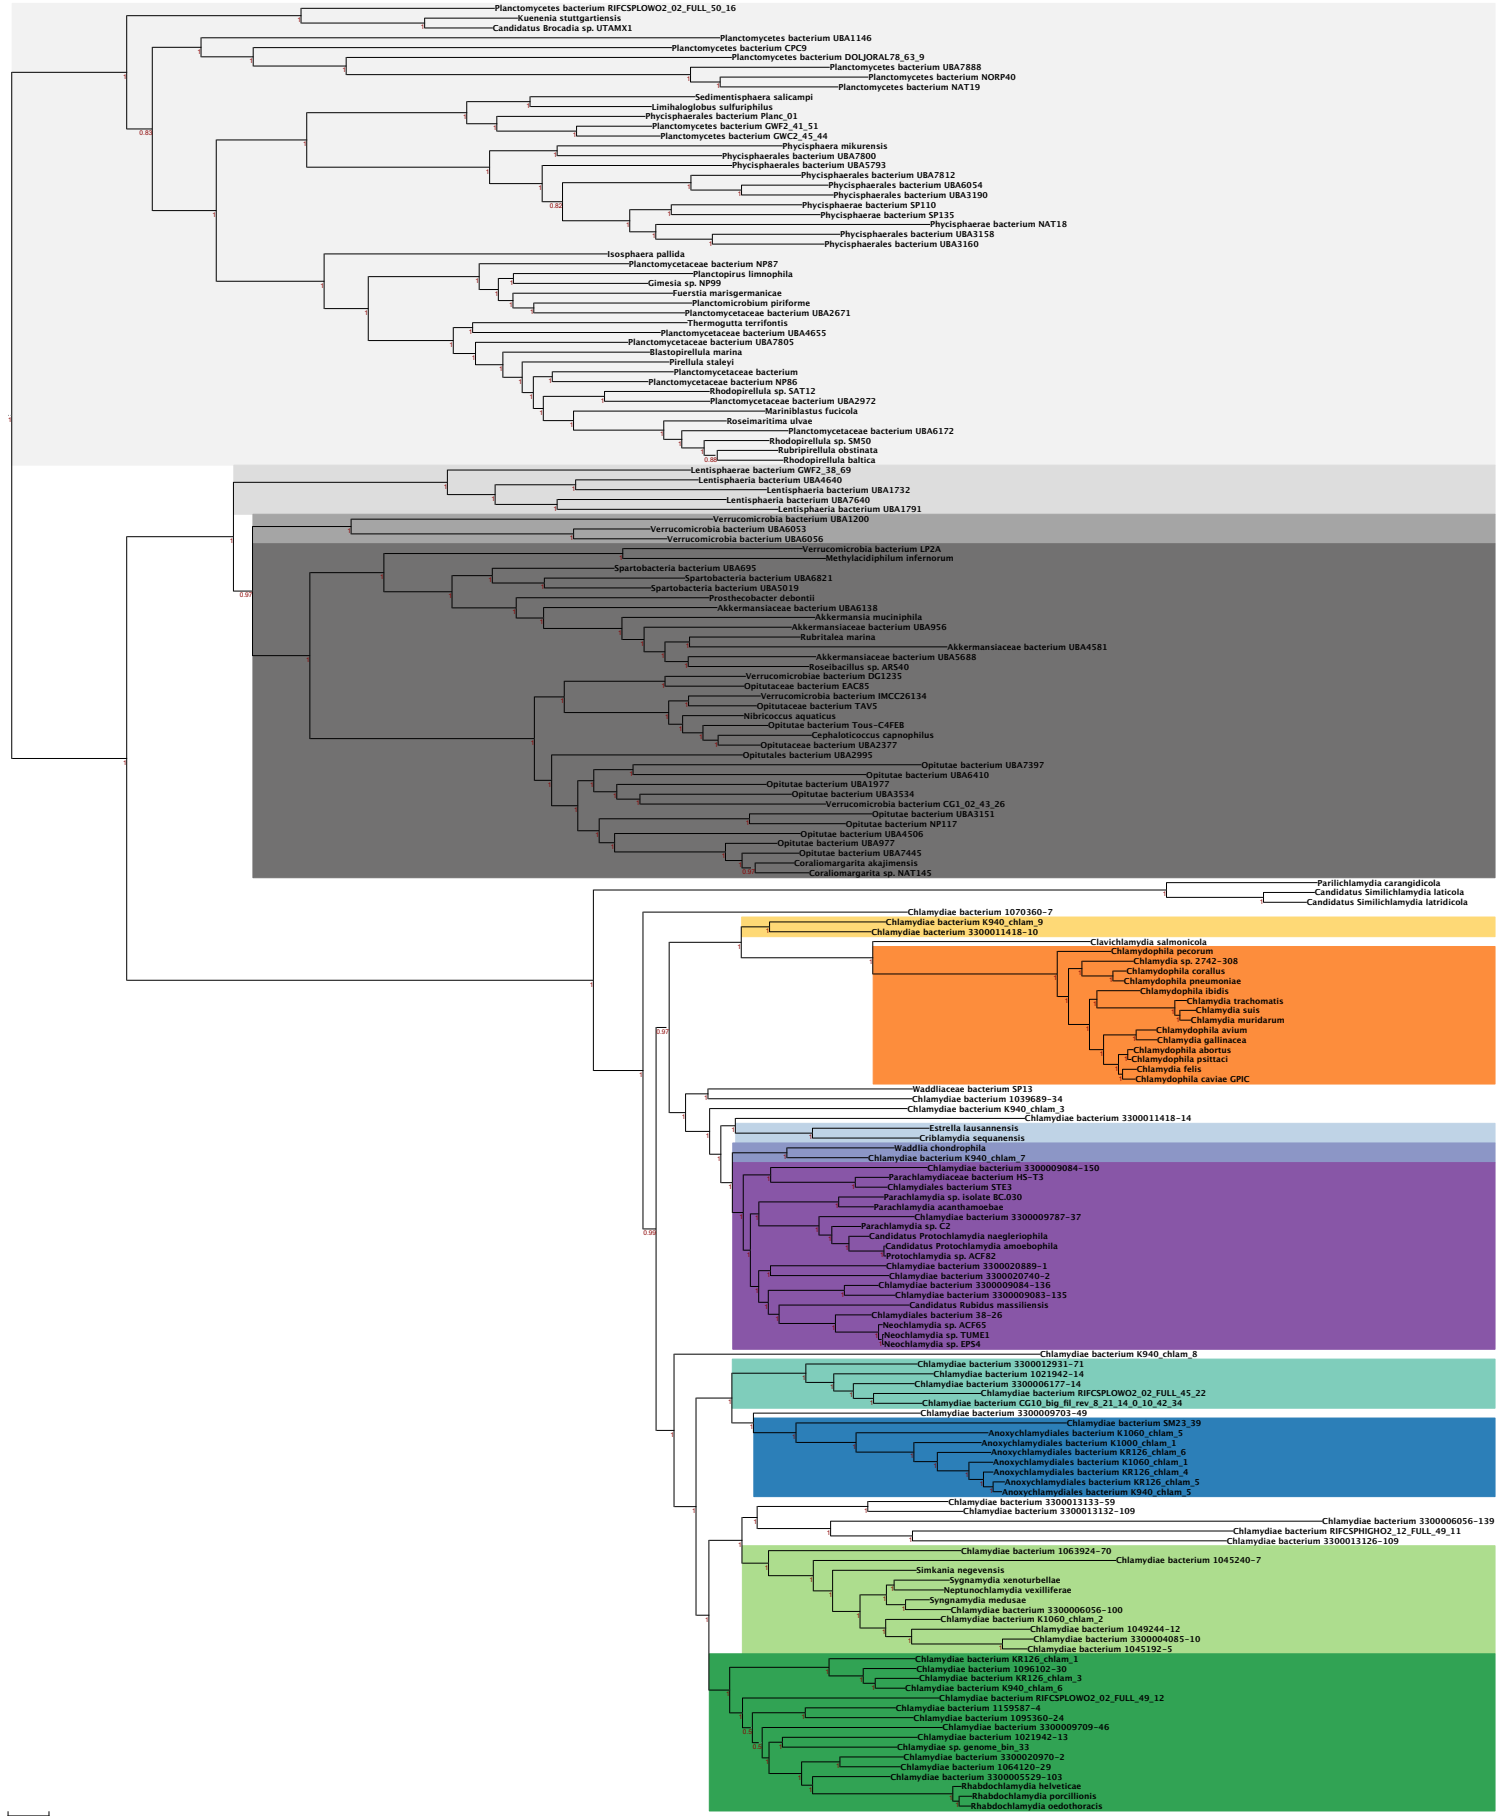

0.1

chain2

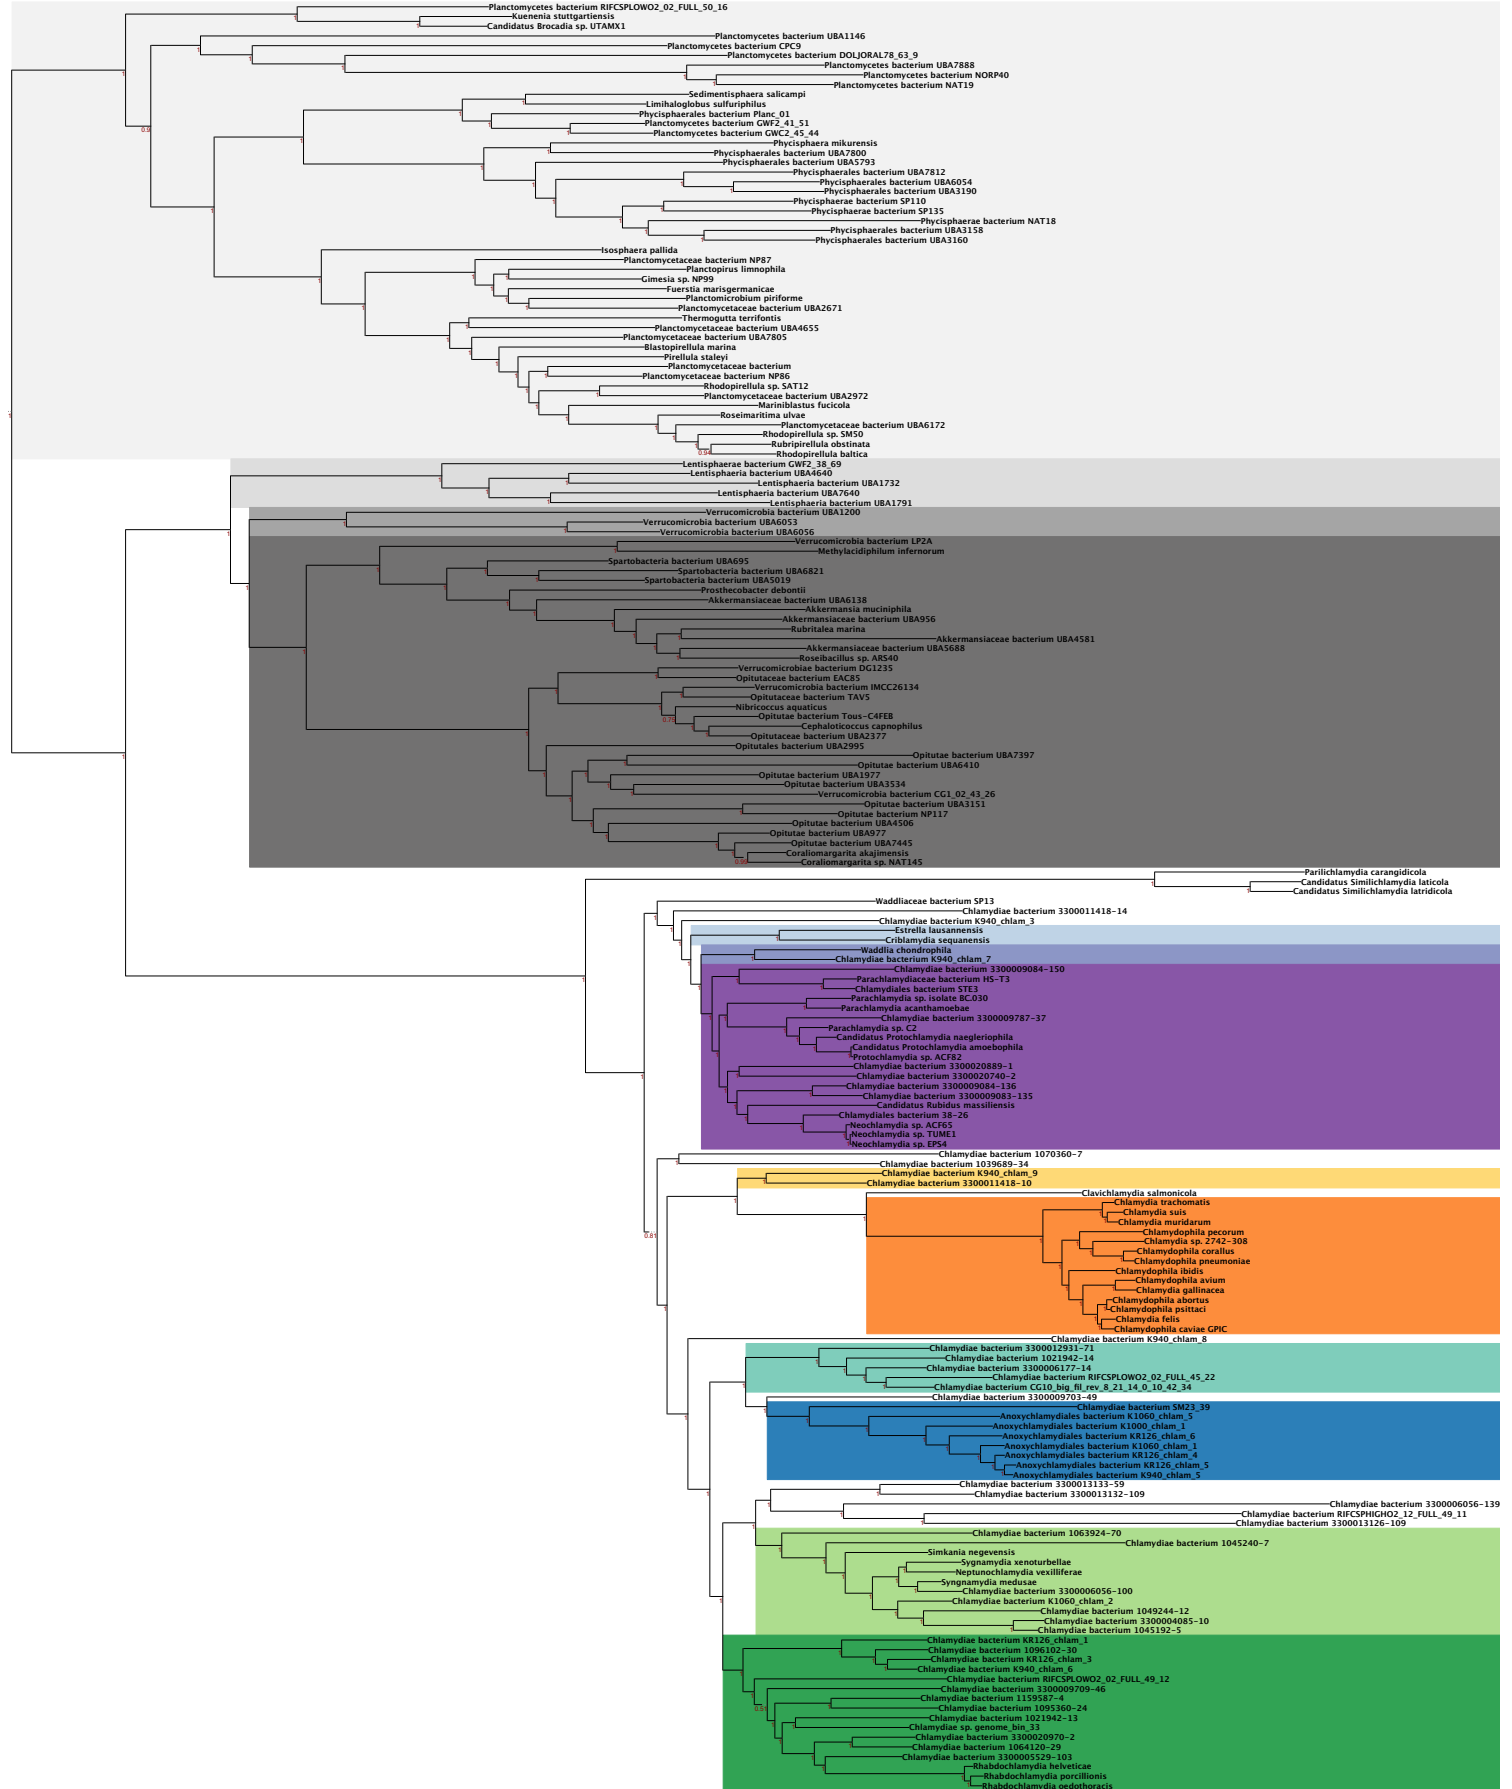

0.1

chain3

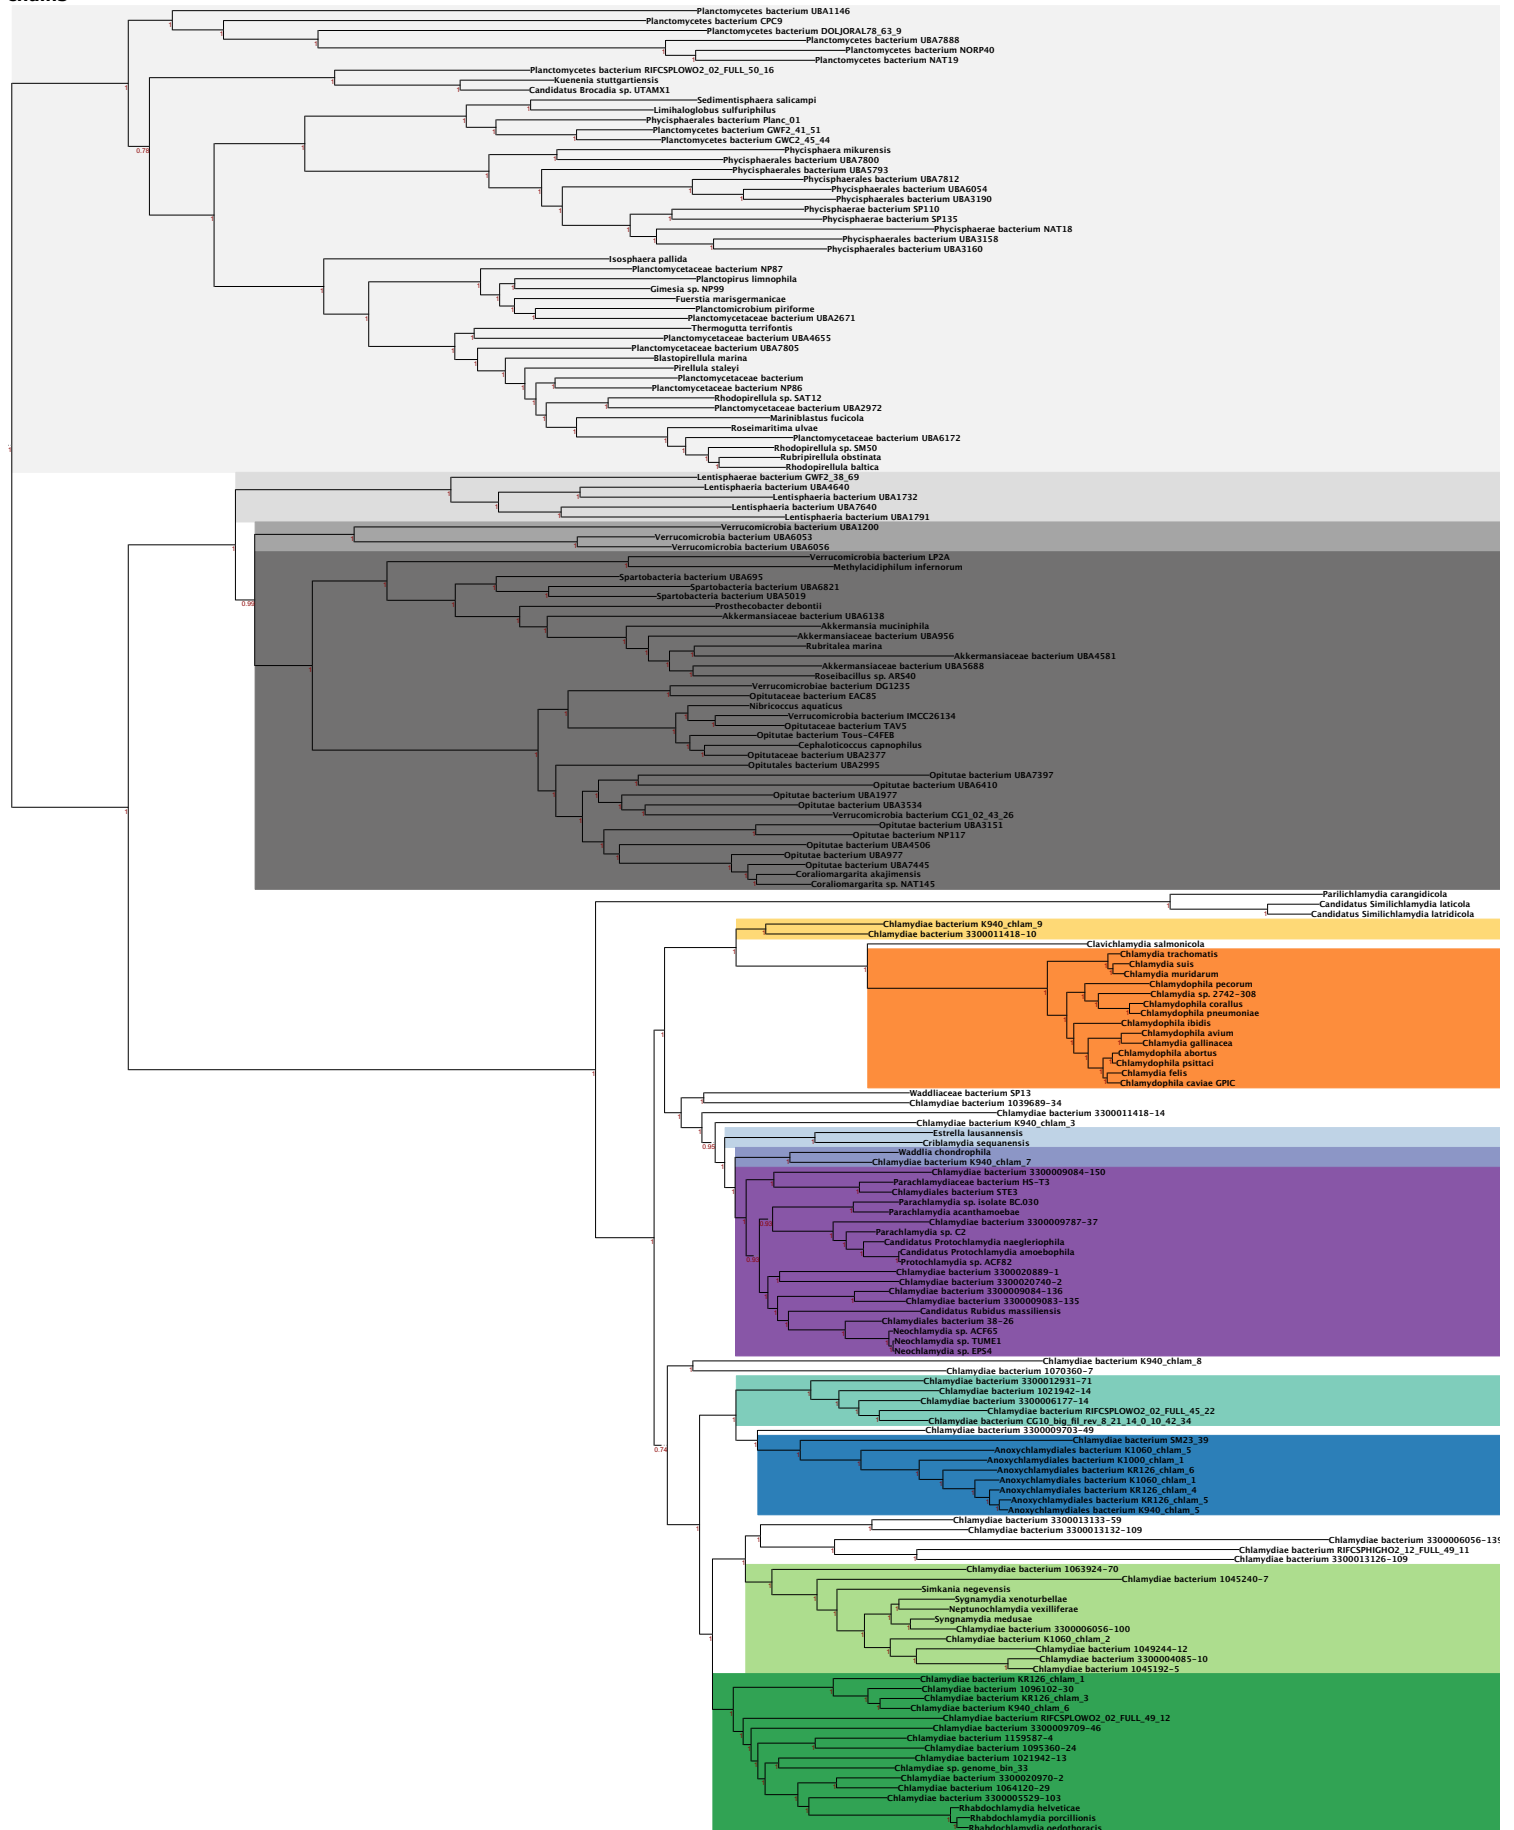

chain4

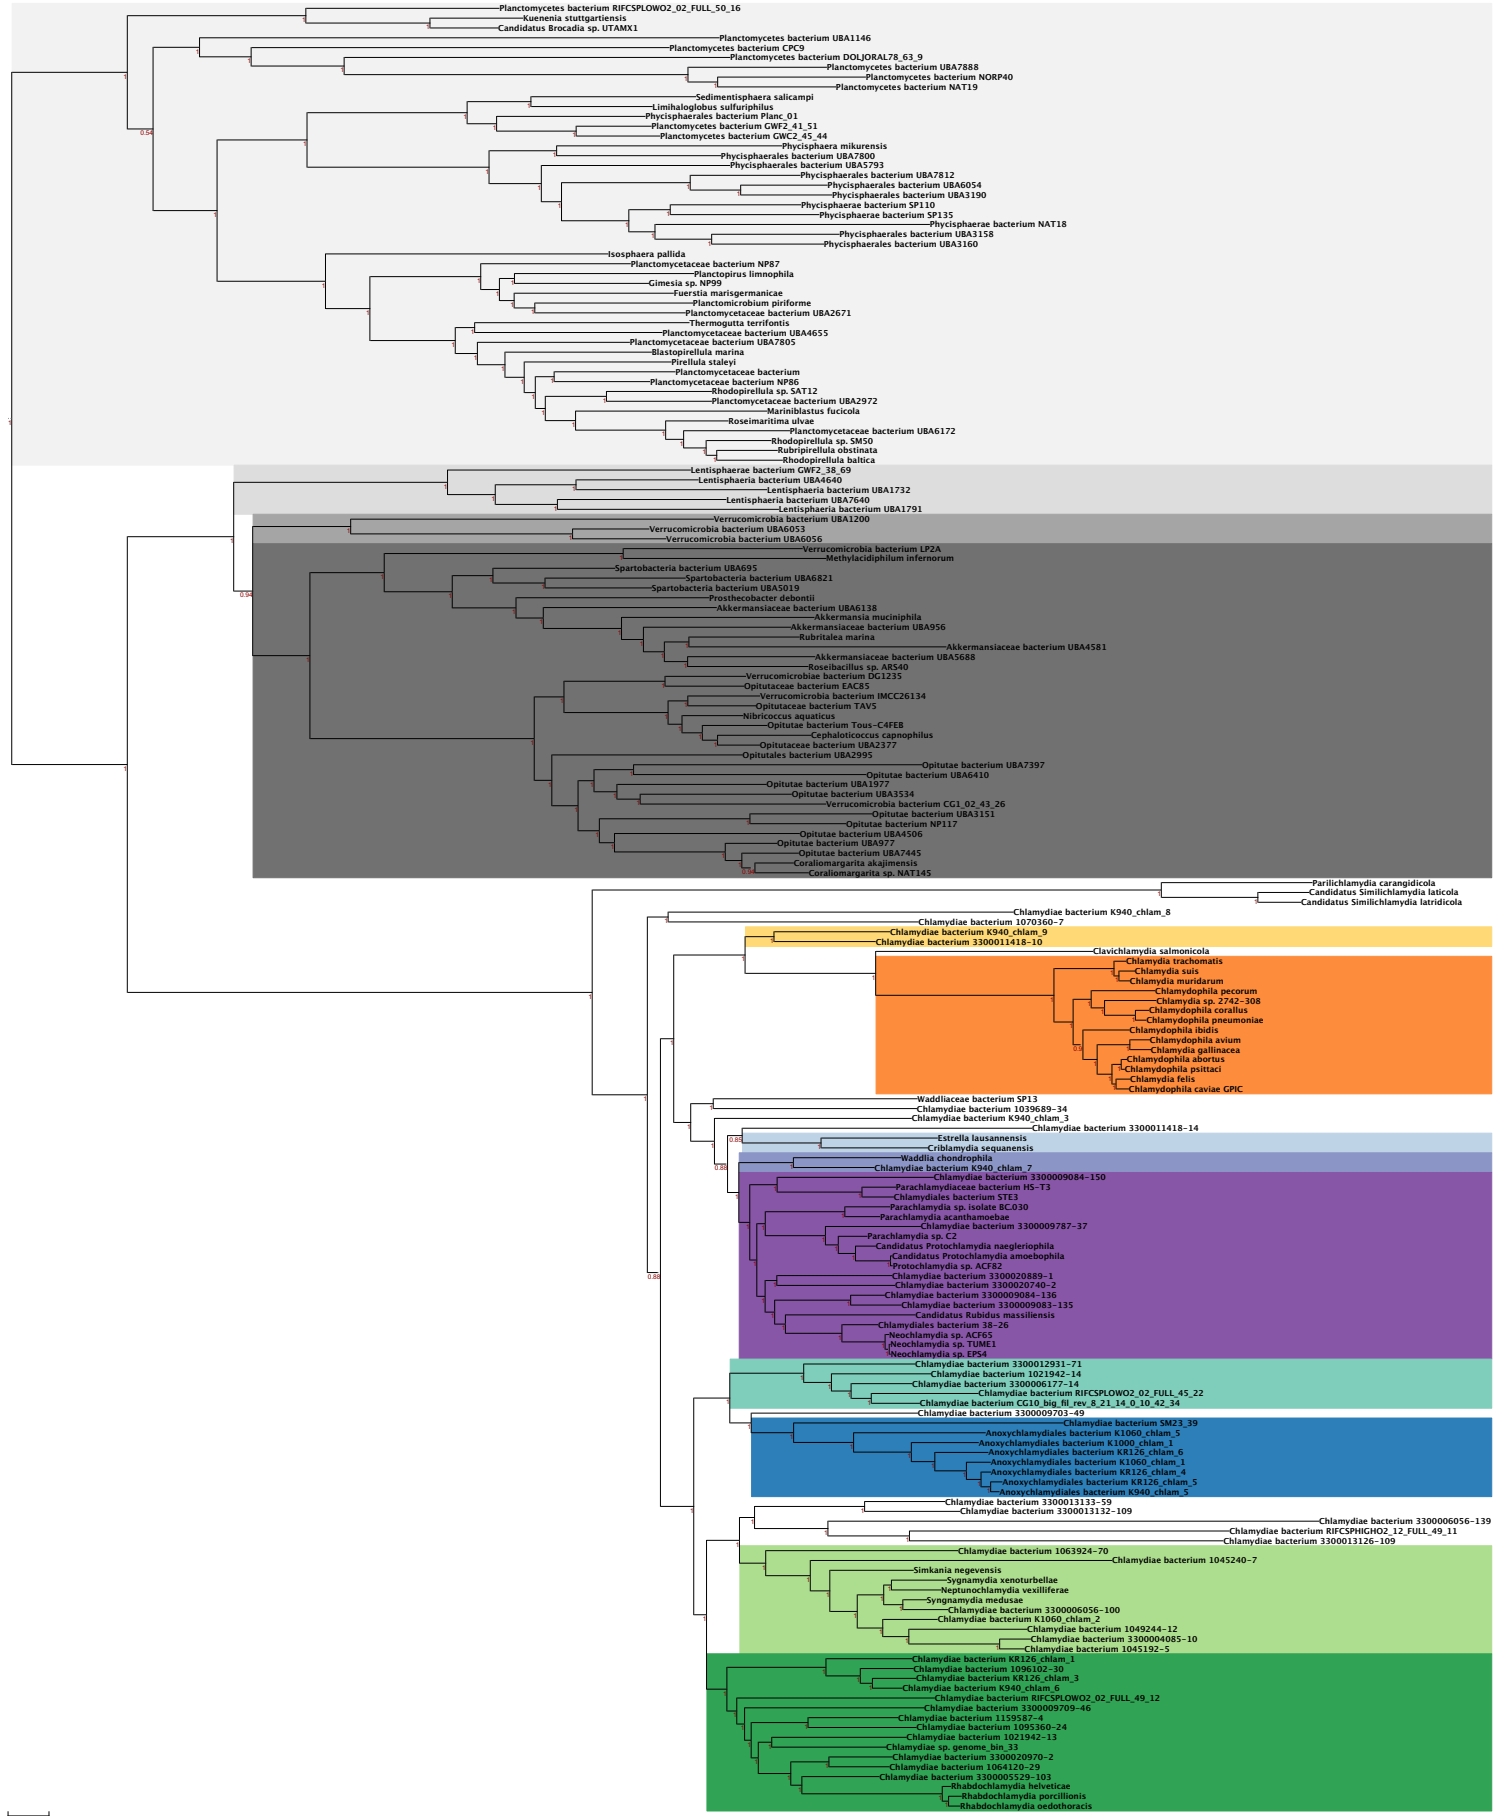

0.1

convergence\_1\_2\_3\_4

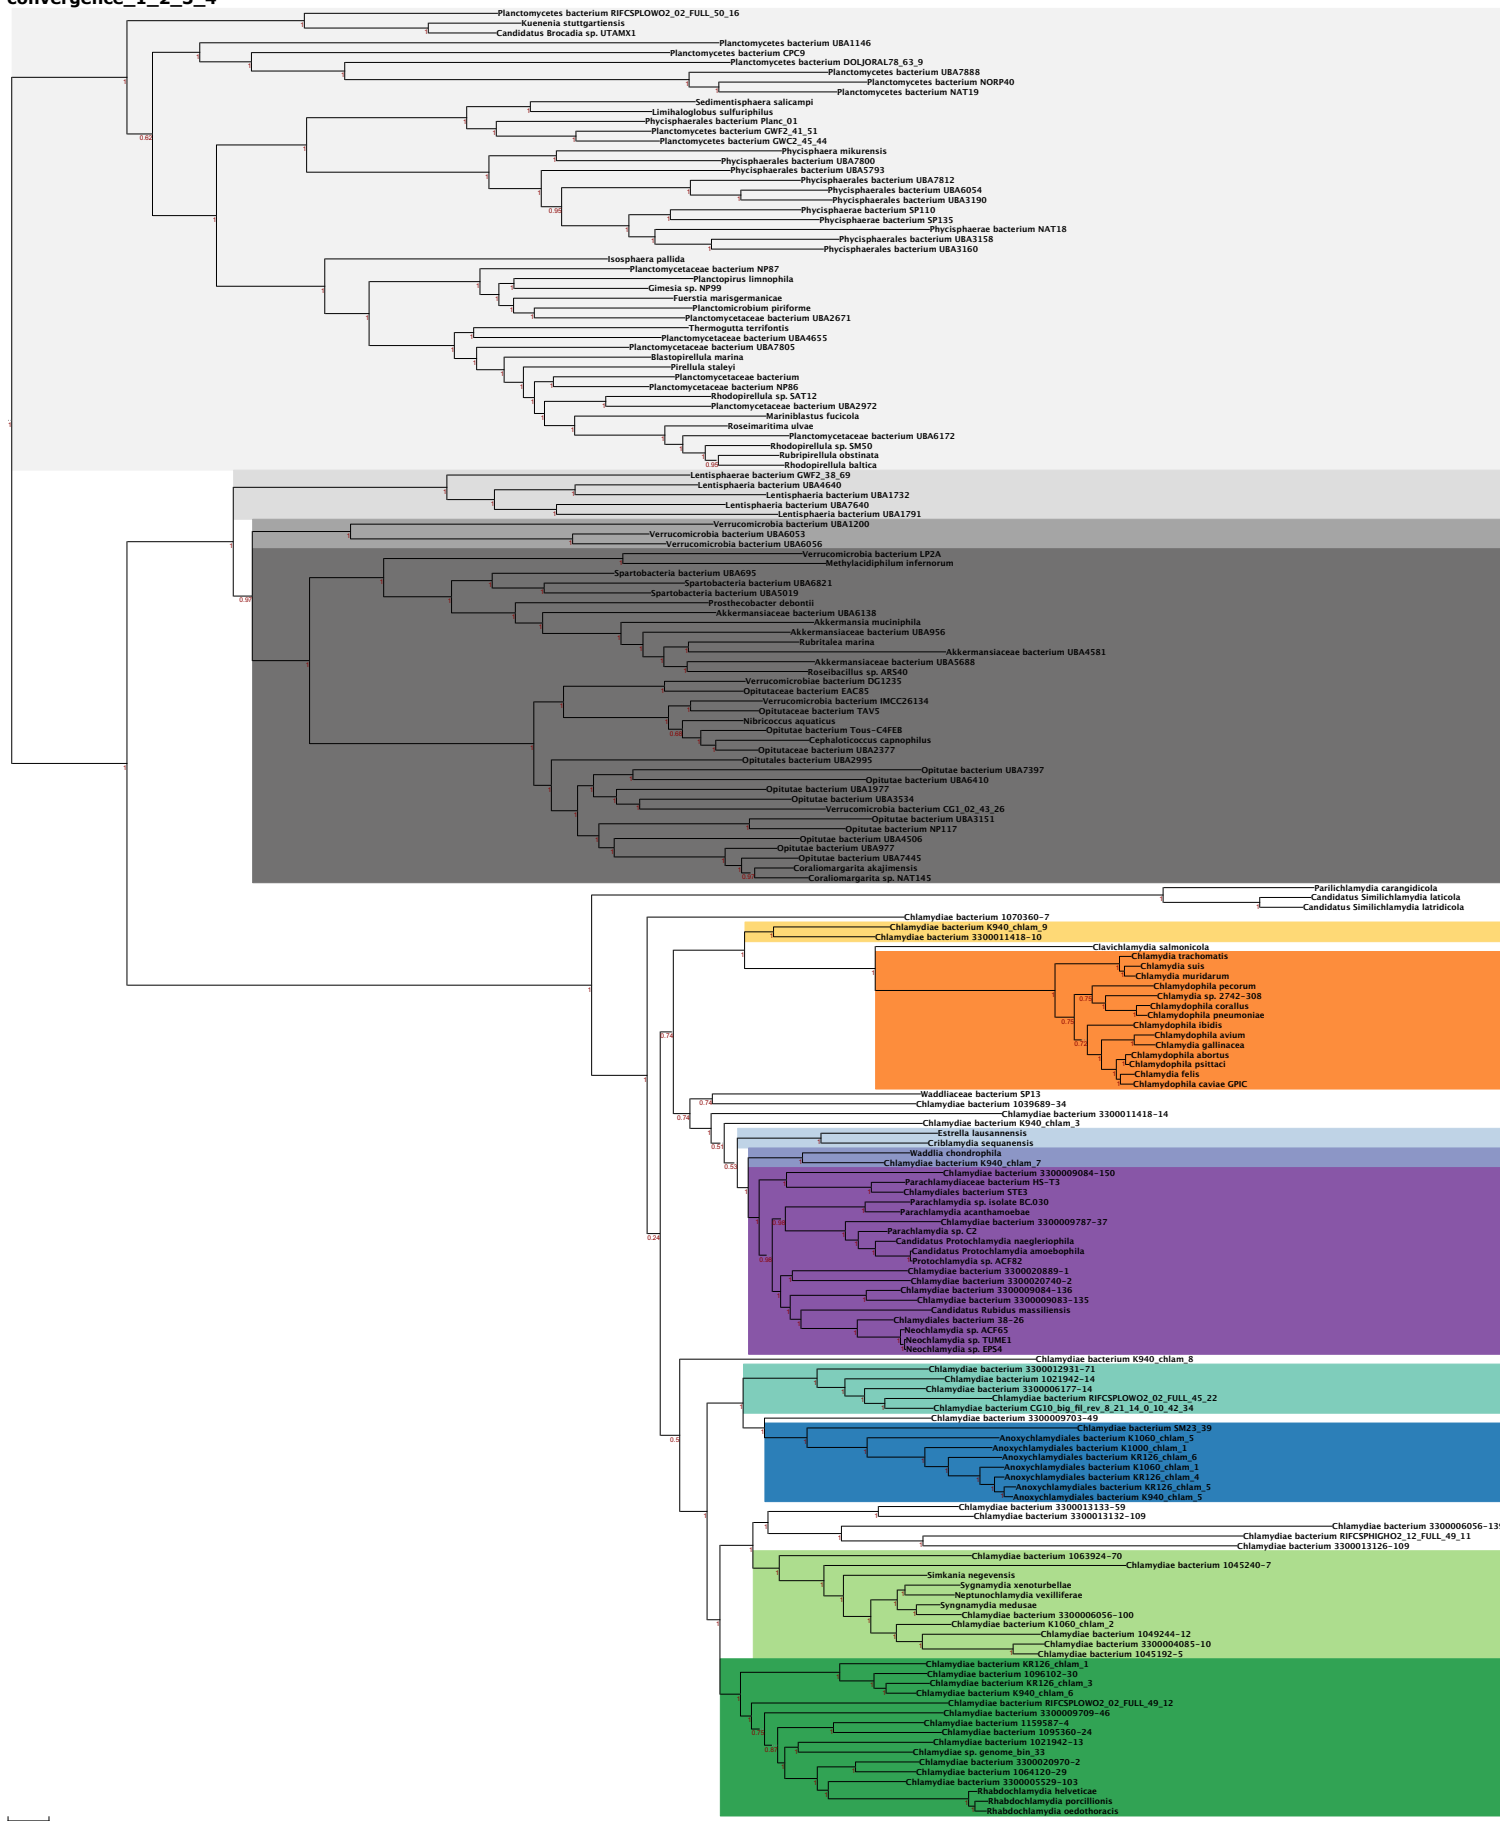

184taxa\_10perc\_pruned

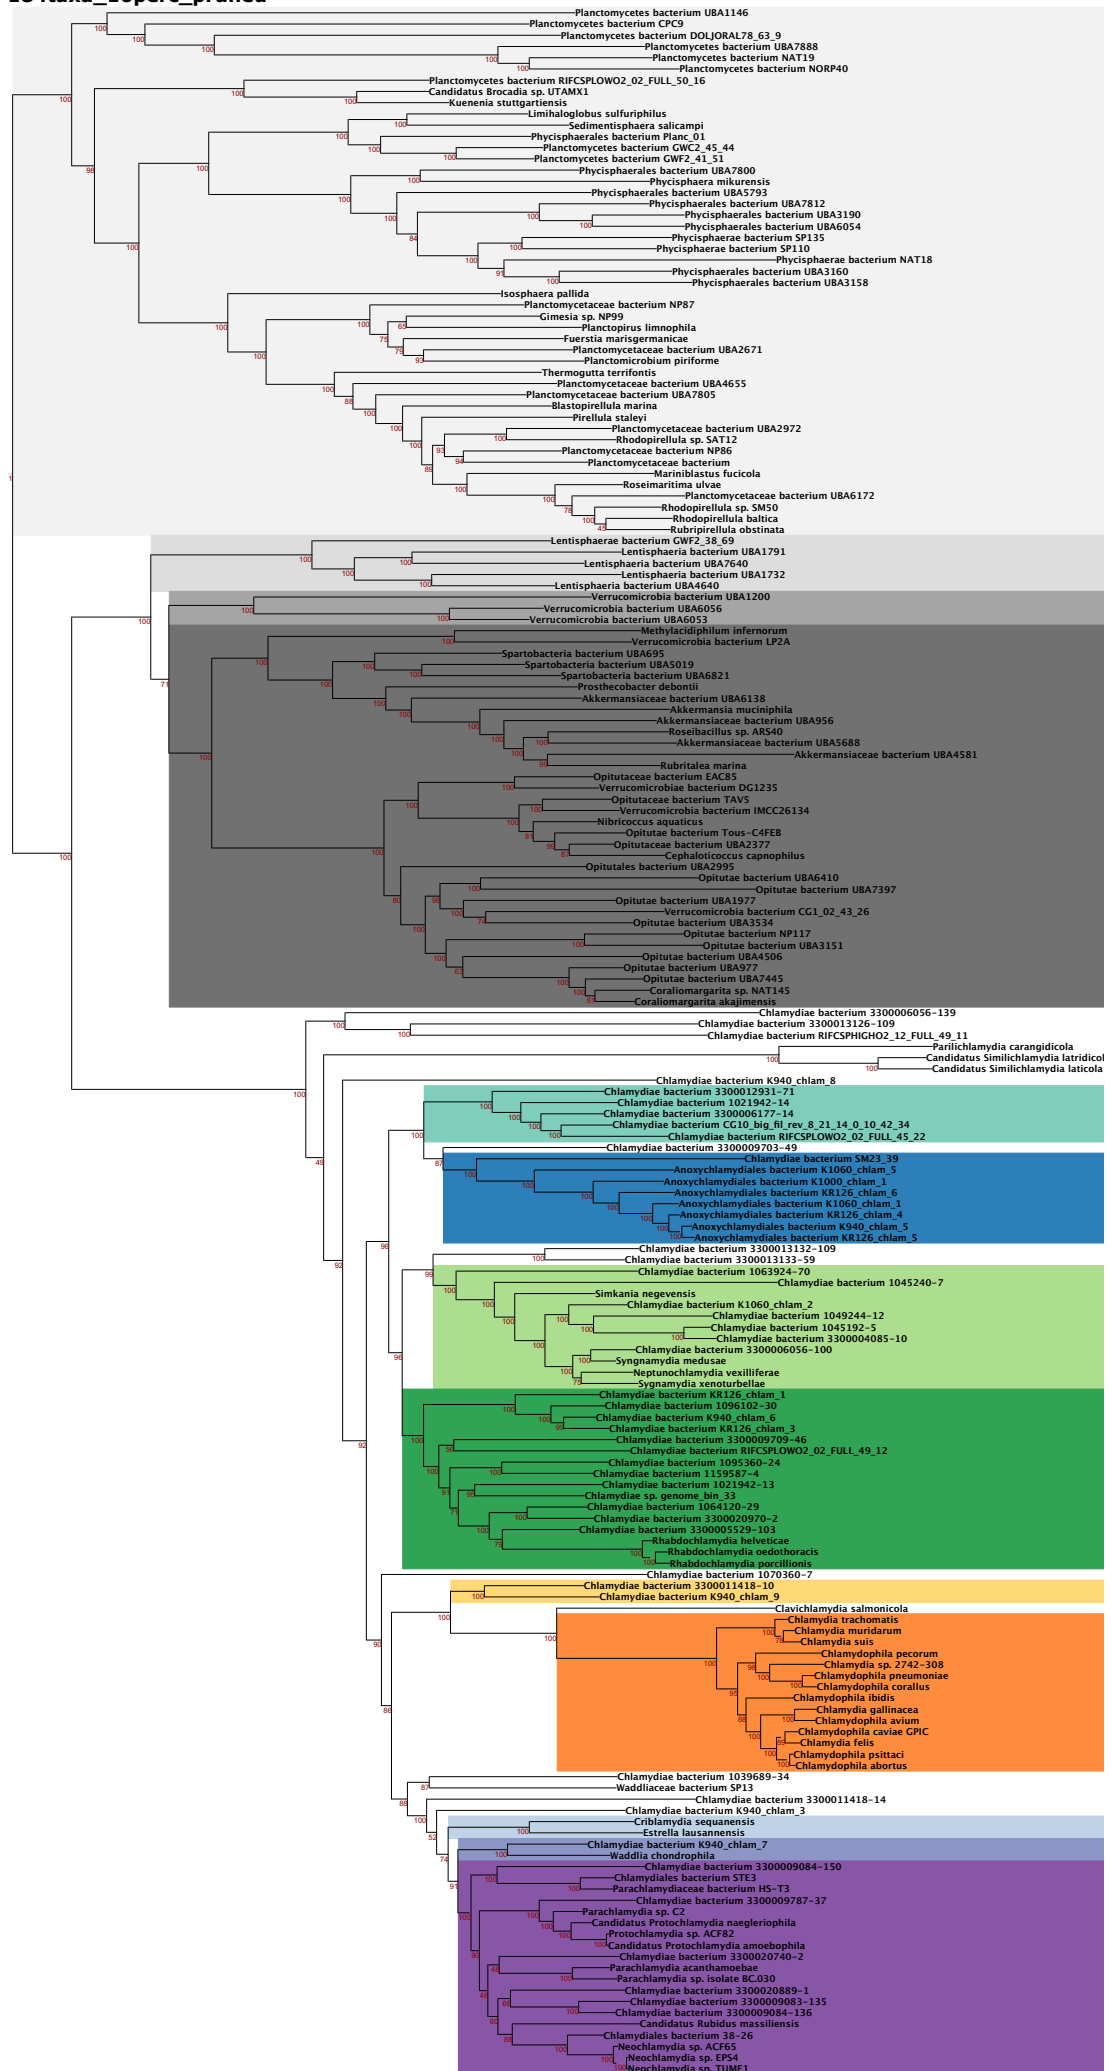

184taxa\_20perc\_pruned

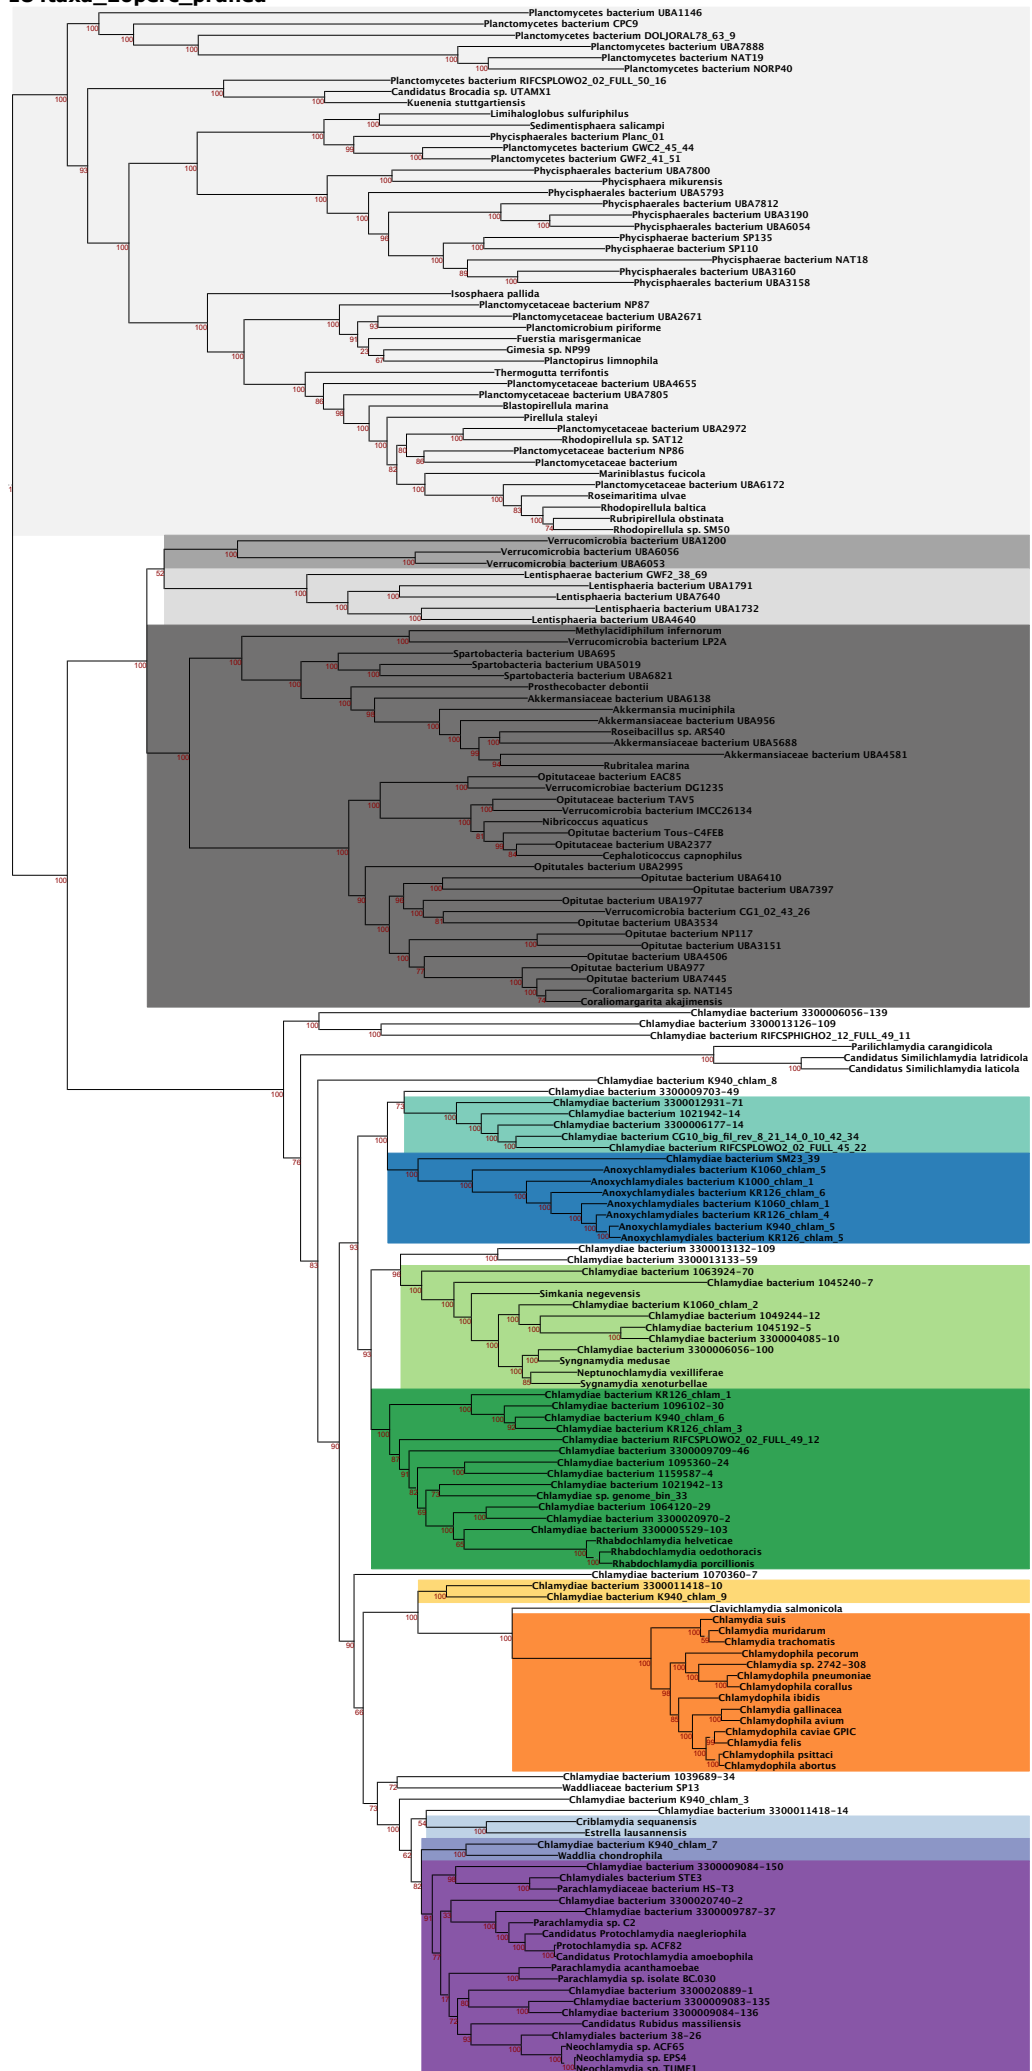

0.1



184taxa\_30perc\_pruned

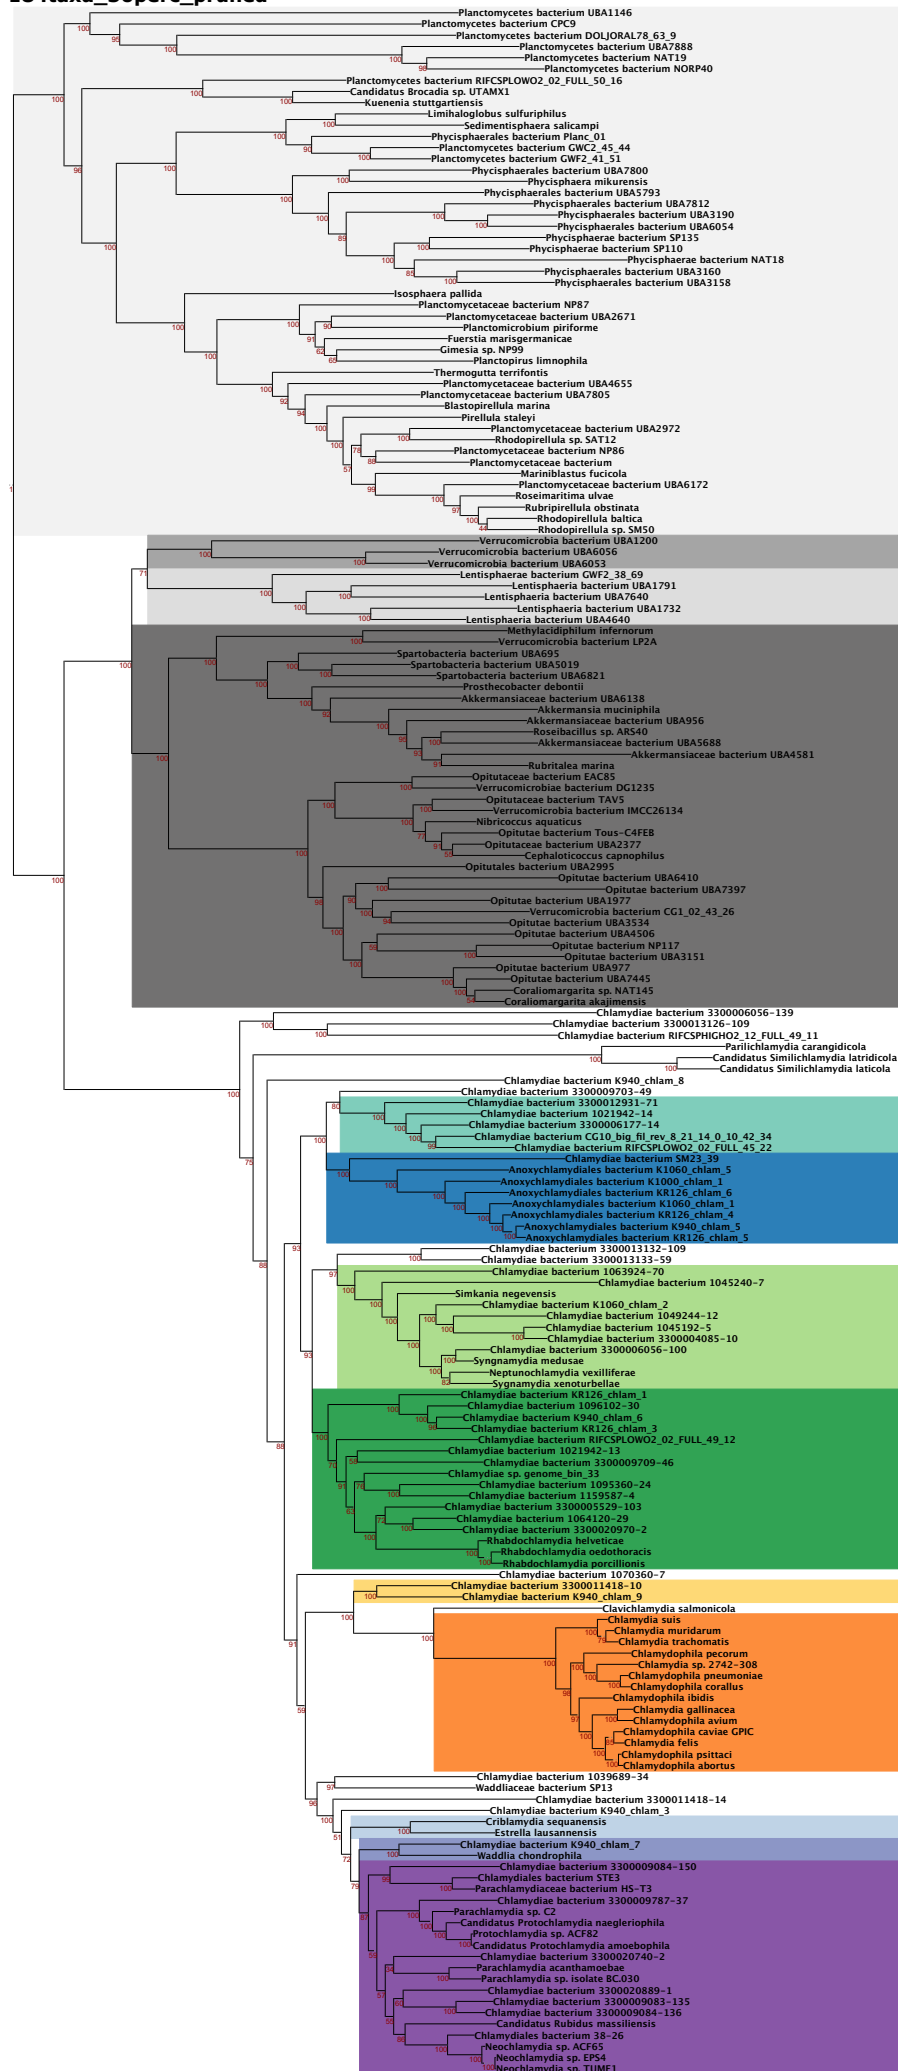

0.1

184taxa\_40perc\_pruned

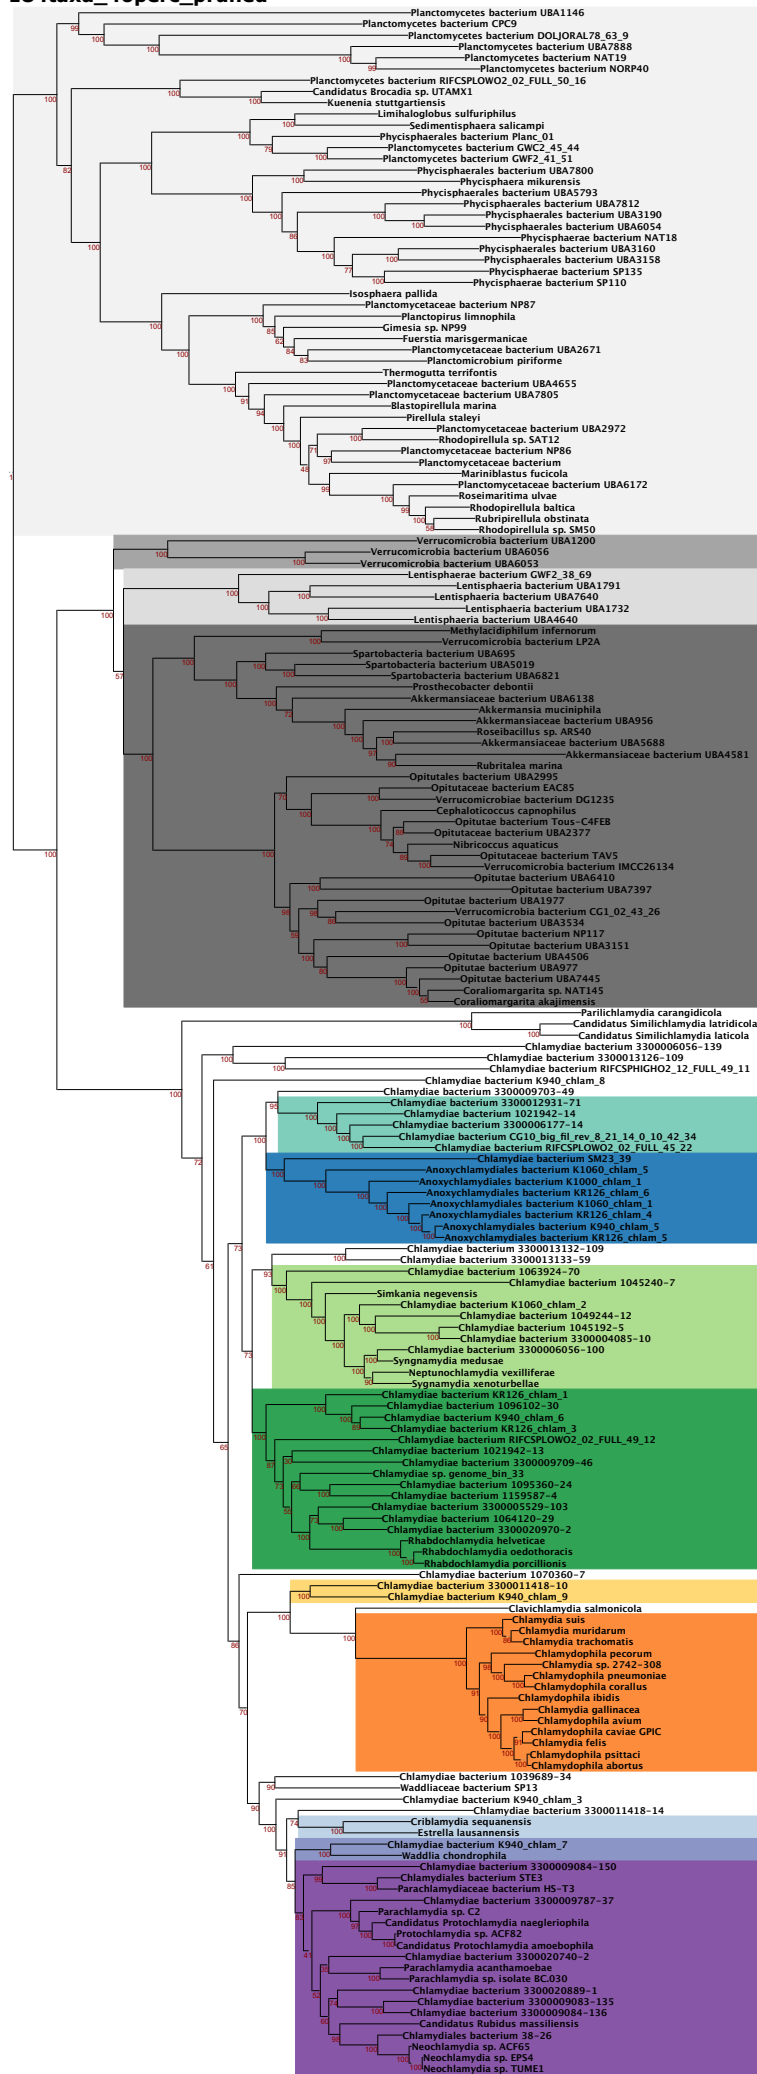

0.1

184taxa\_50perc\_pruned

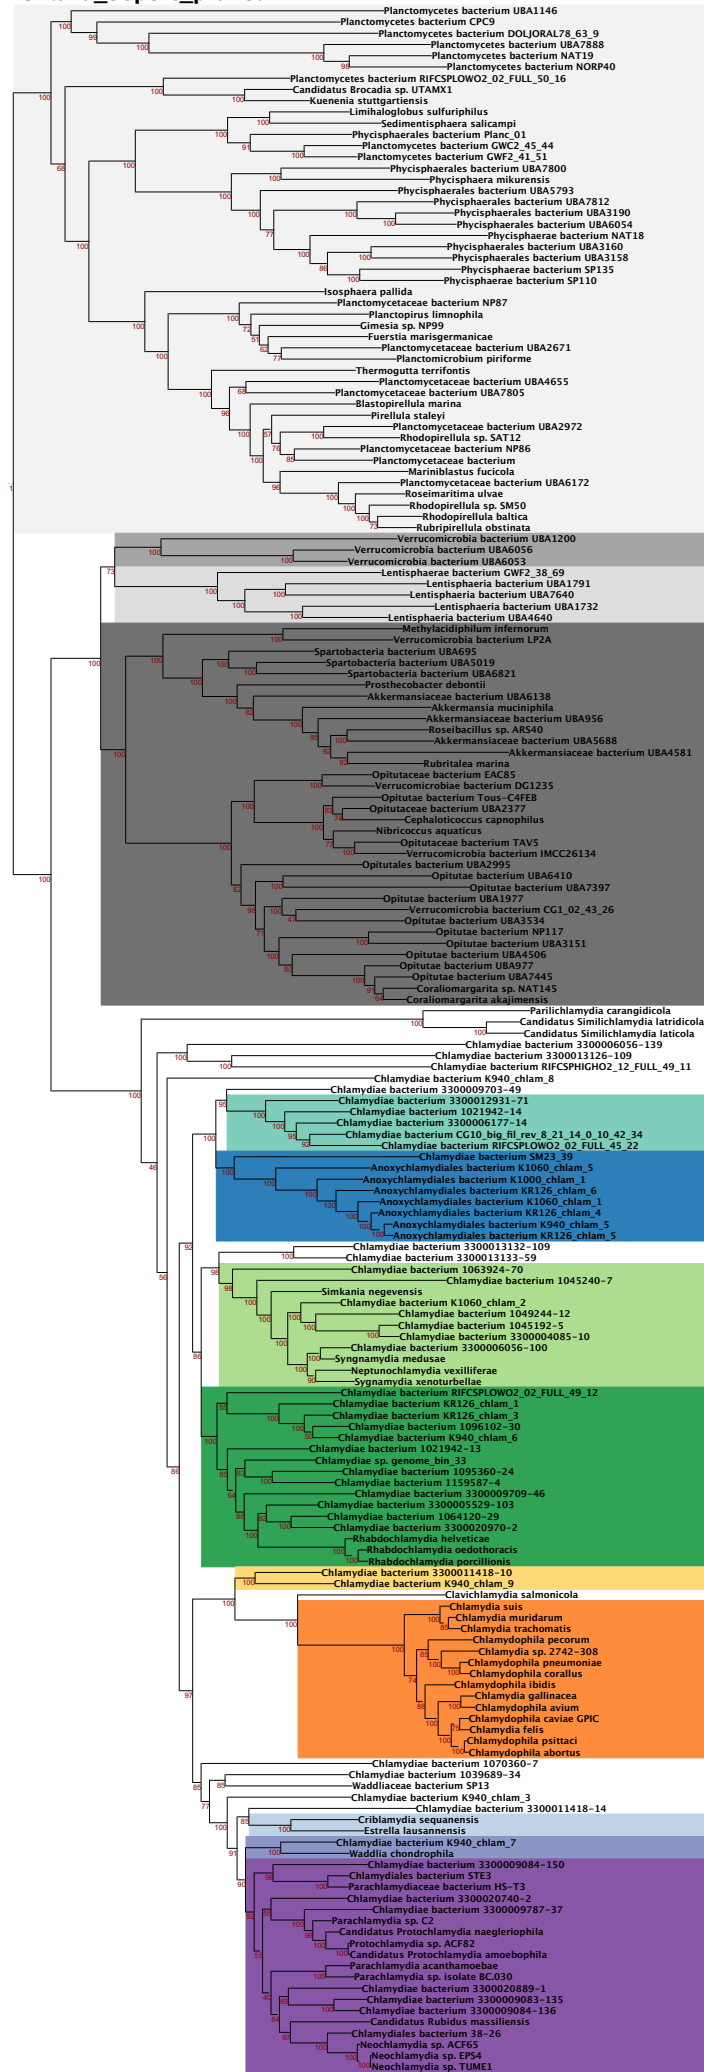

0.1

184taxa\_51perc\_pruned\_bias\_removed

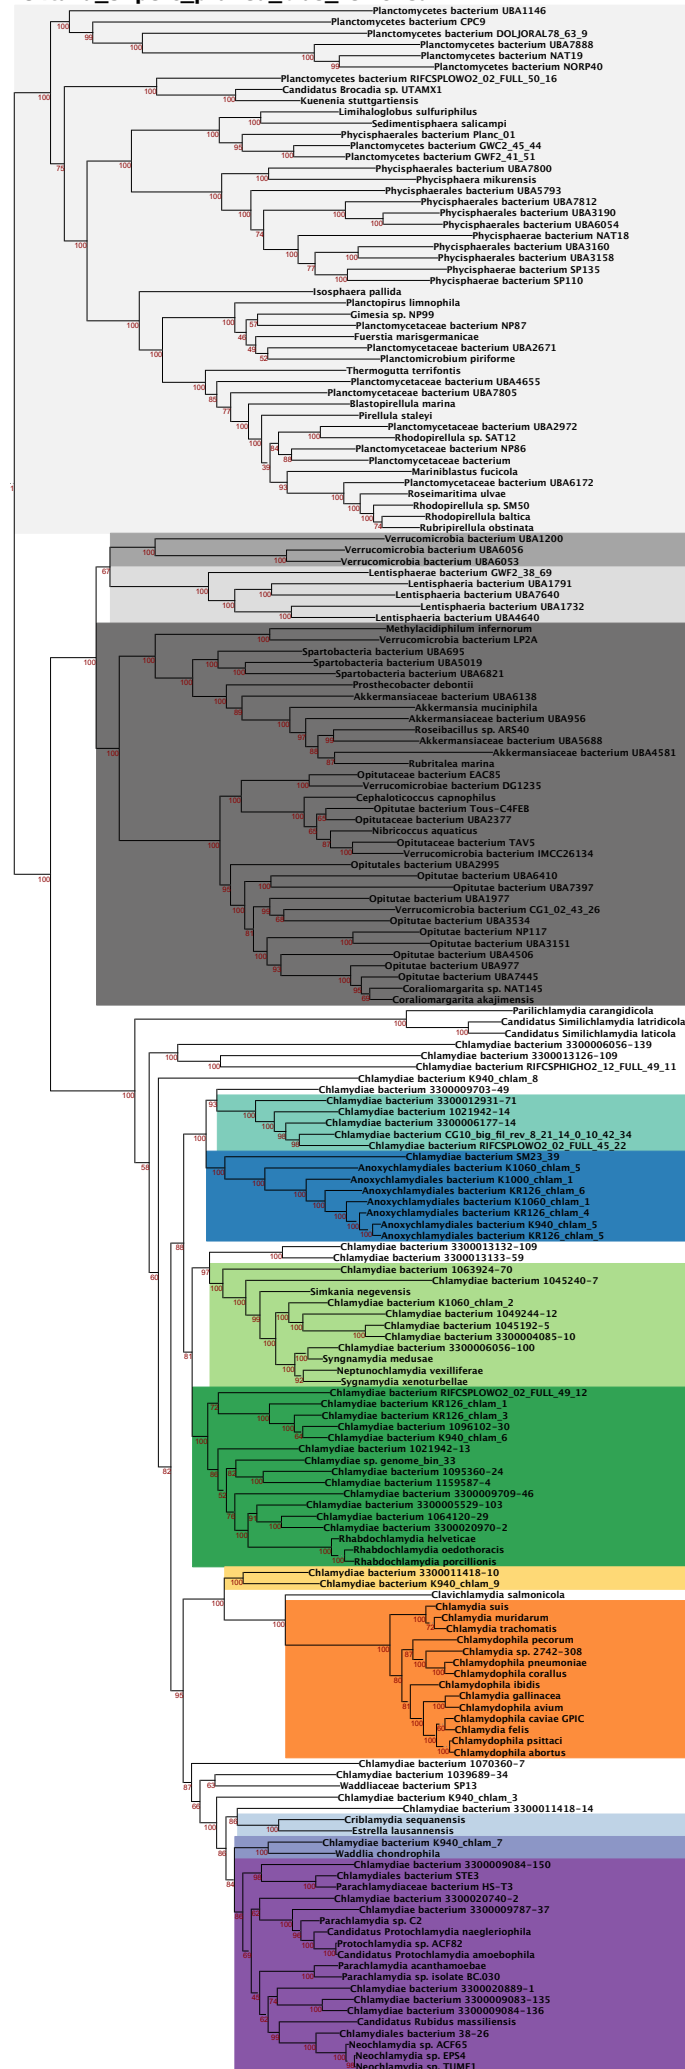

0.1

184taxa\_51perc\_pruned\_bias\_removed

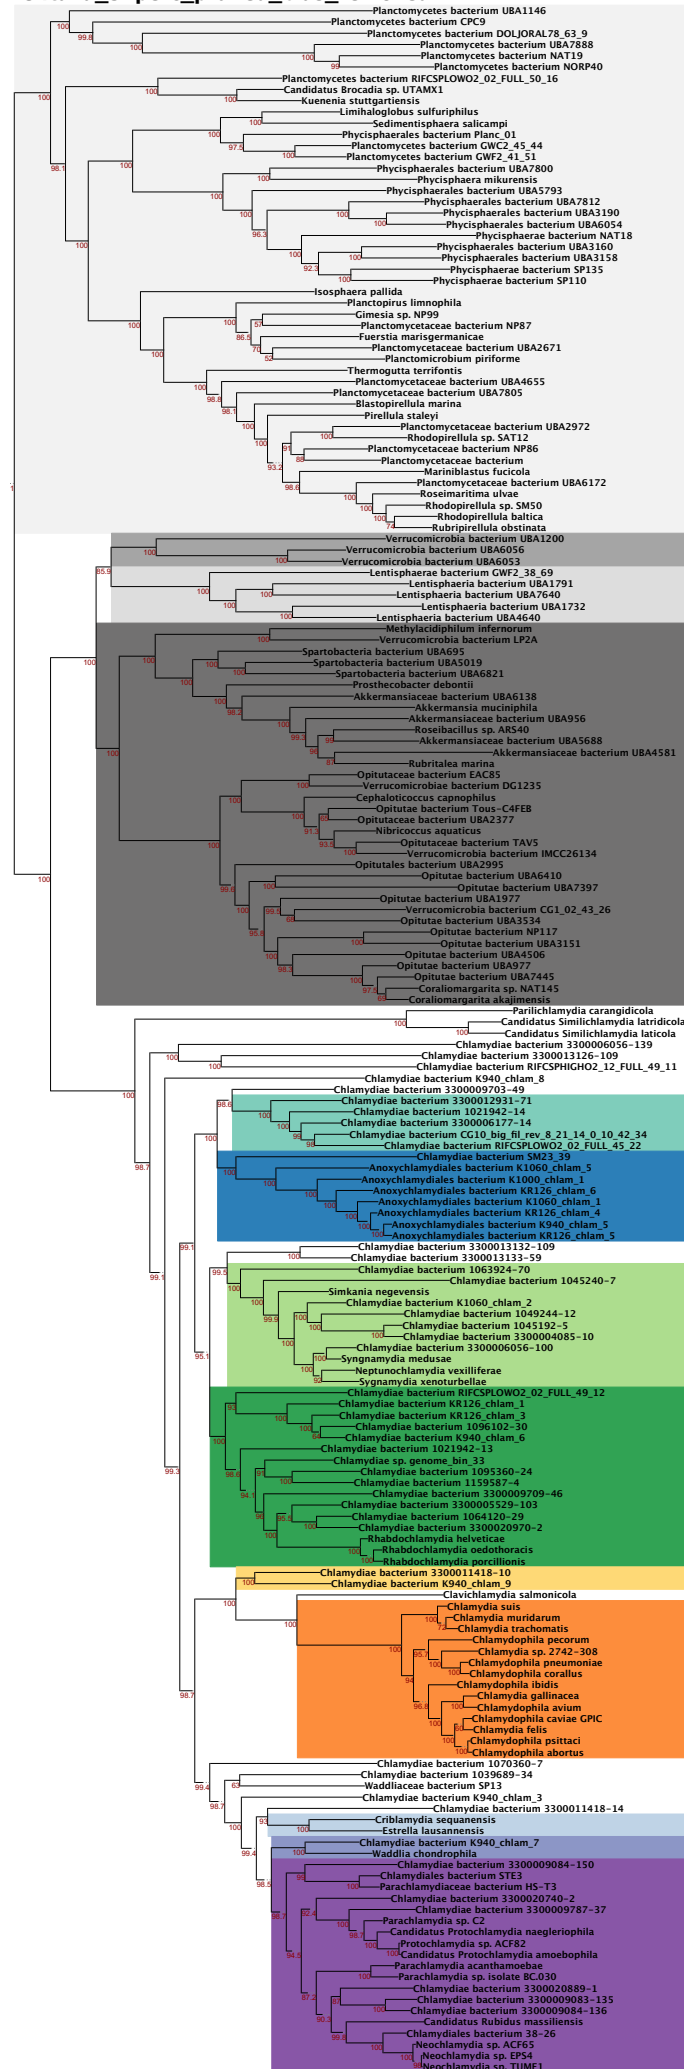

0.1

chain1

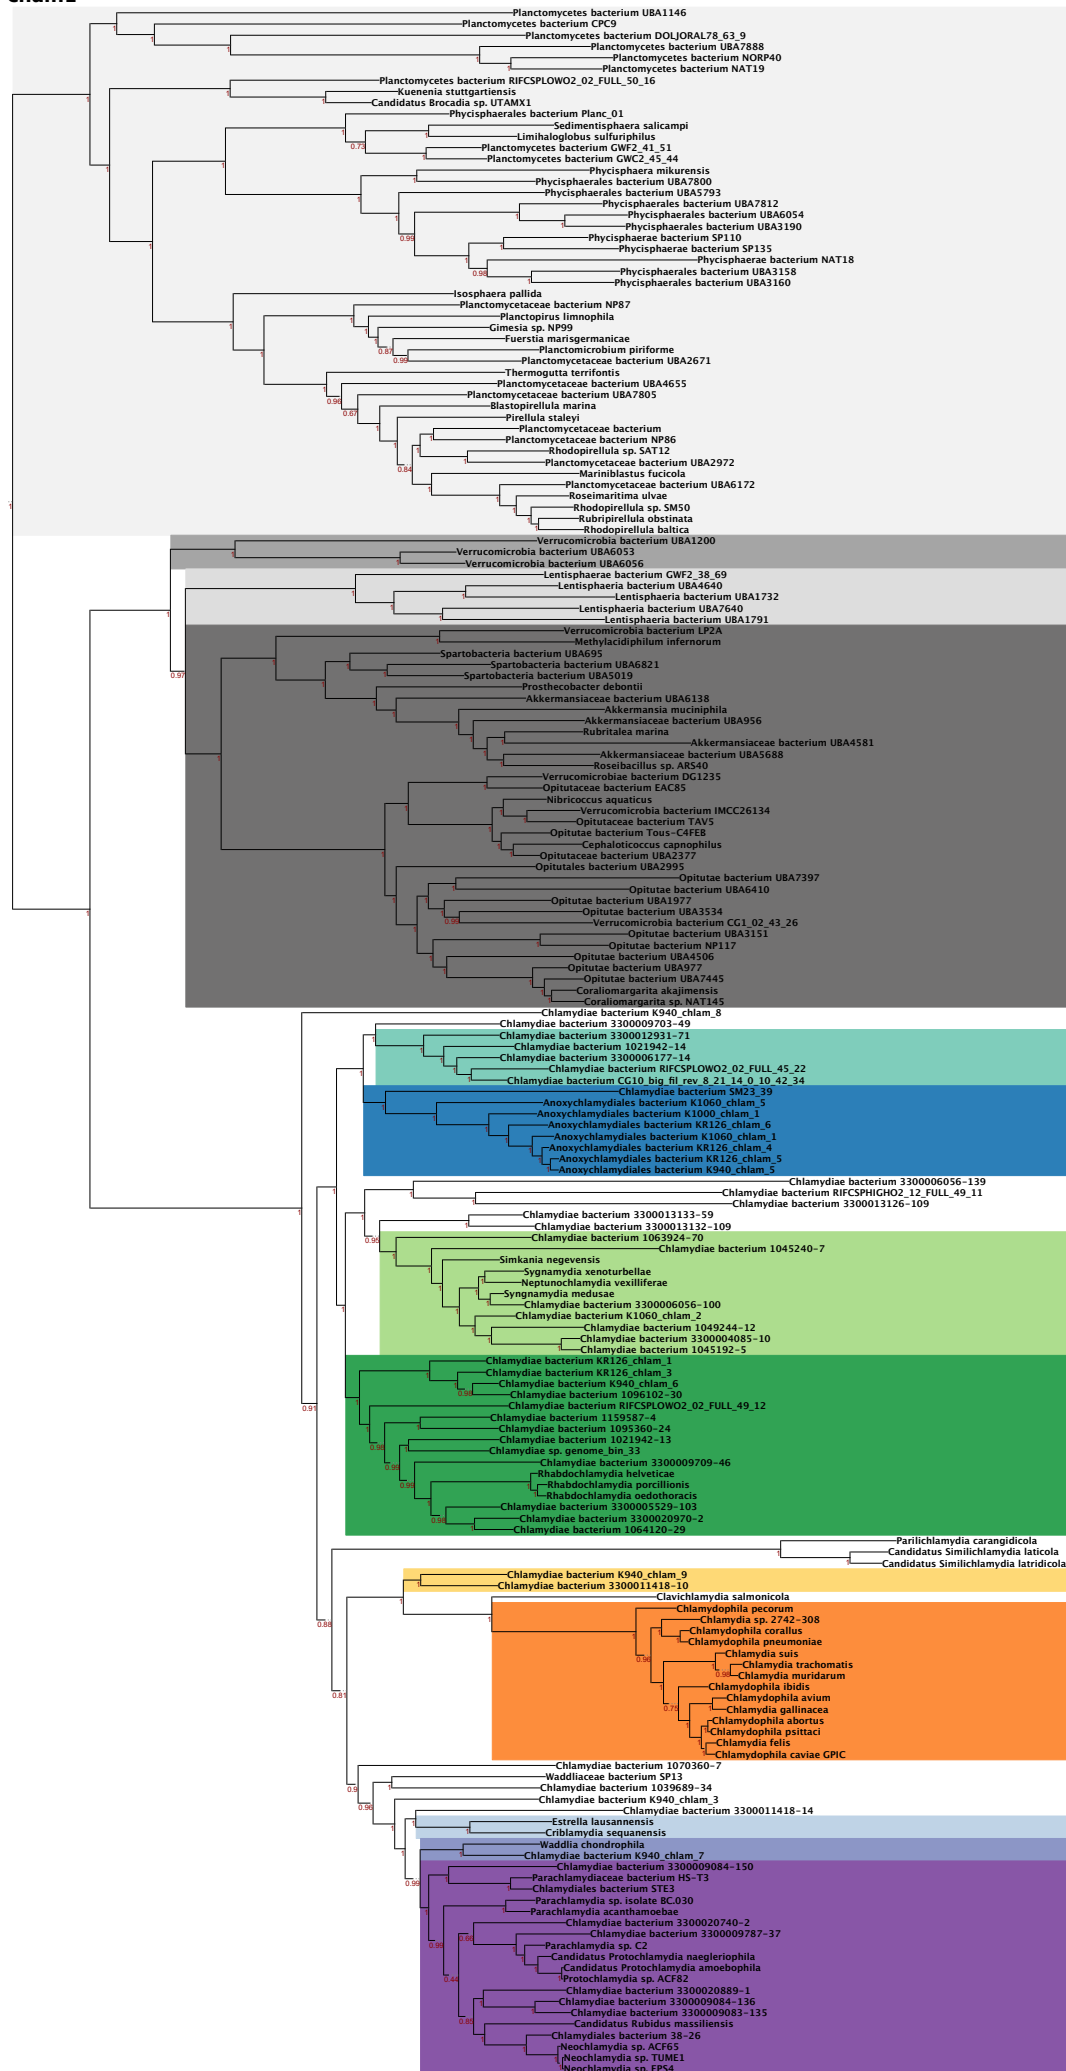

0.1

chain2

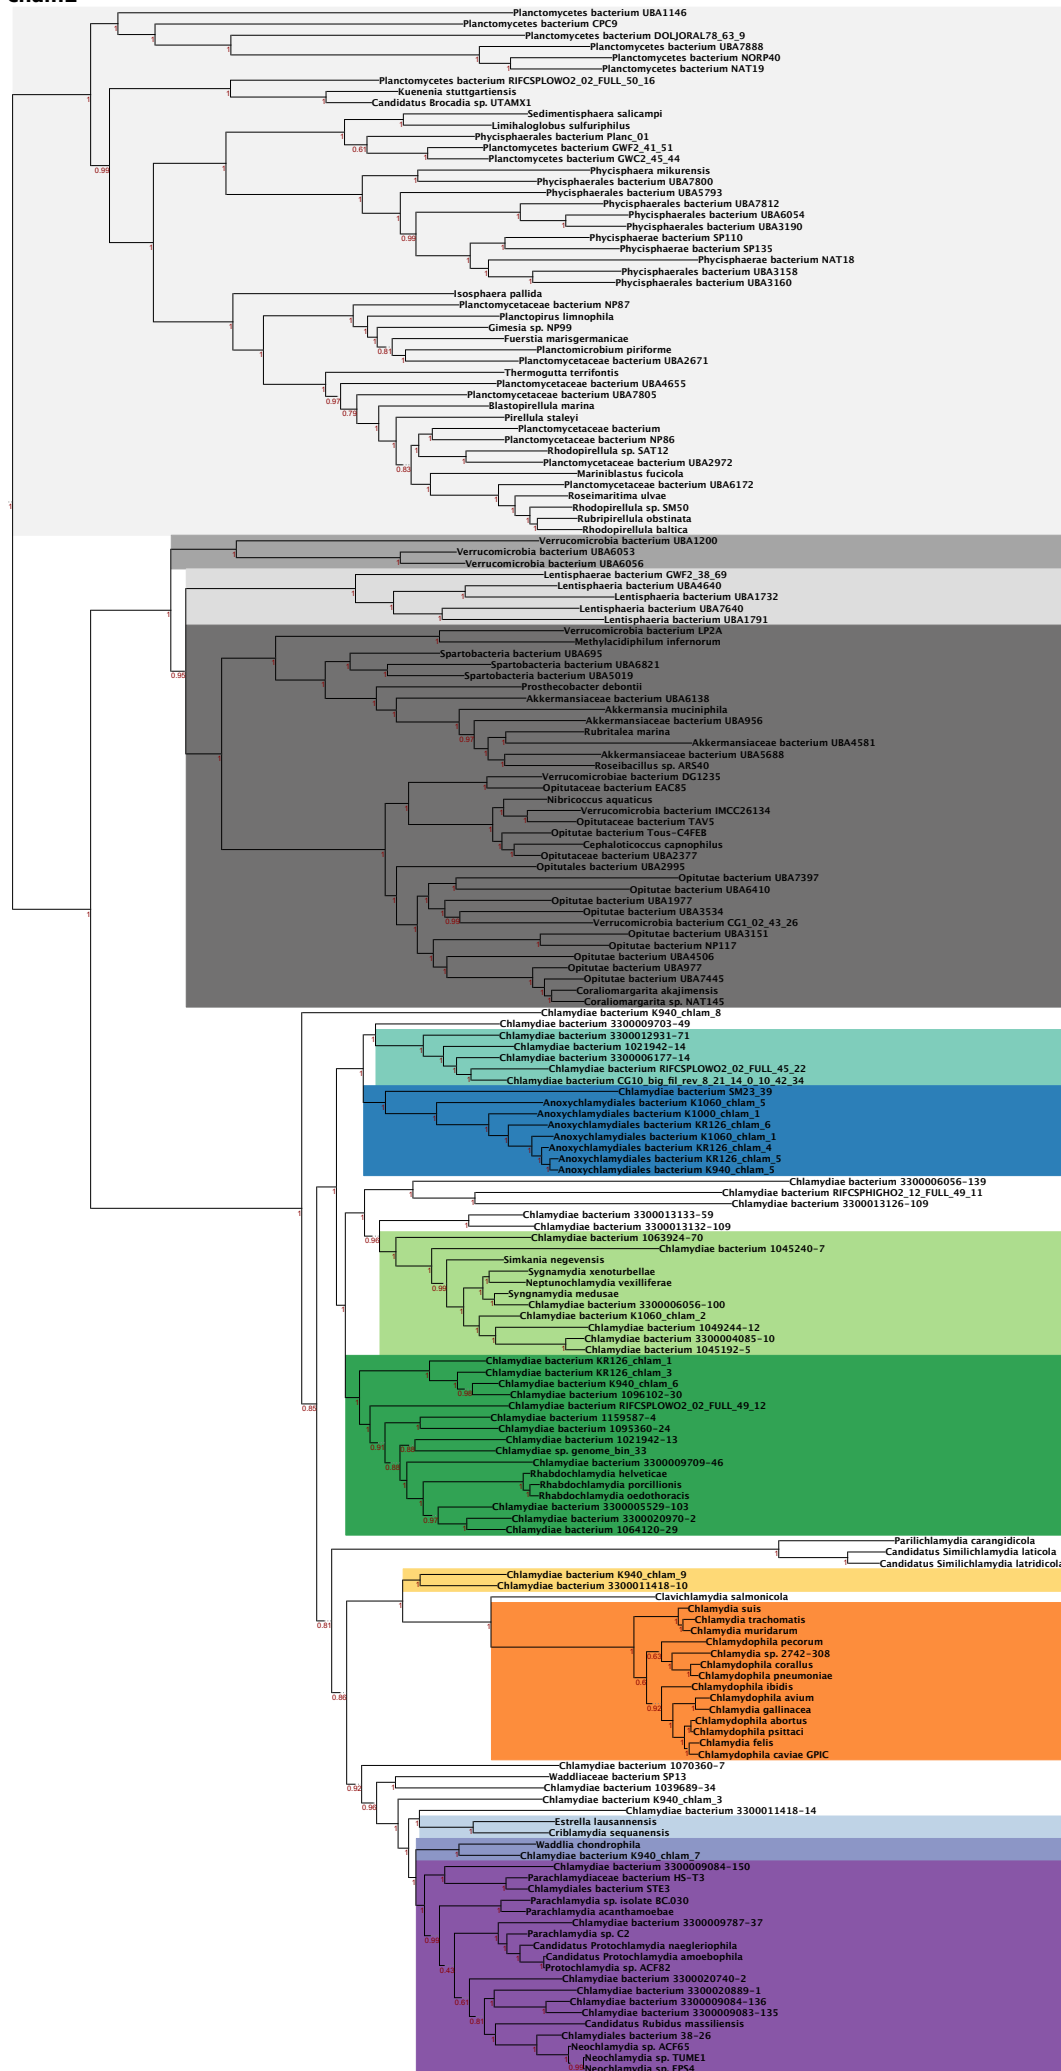

0.1



chain3

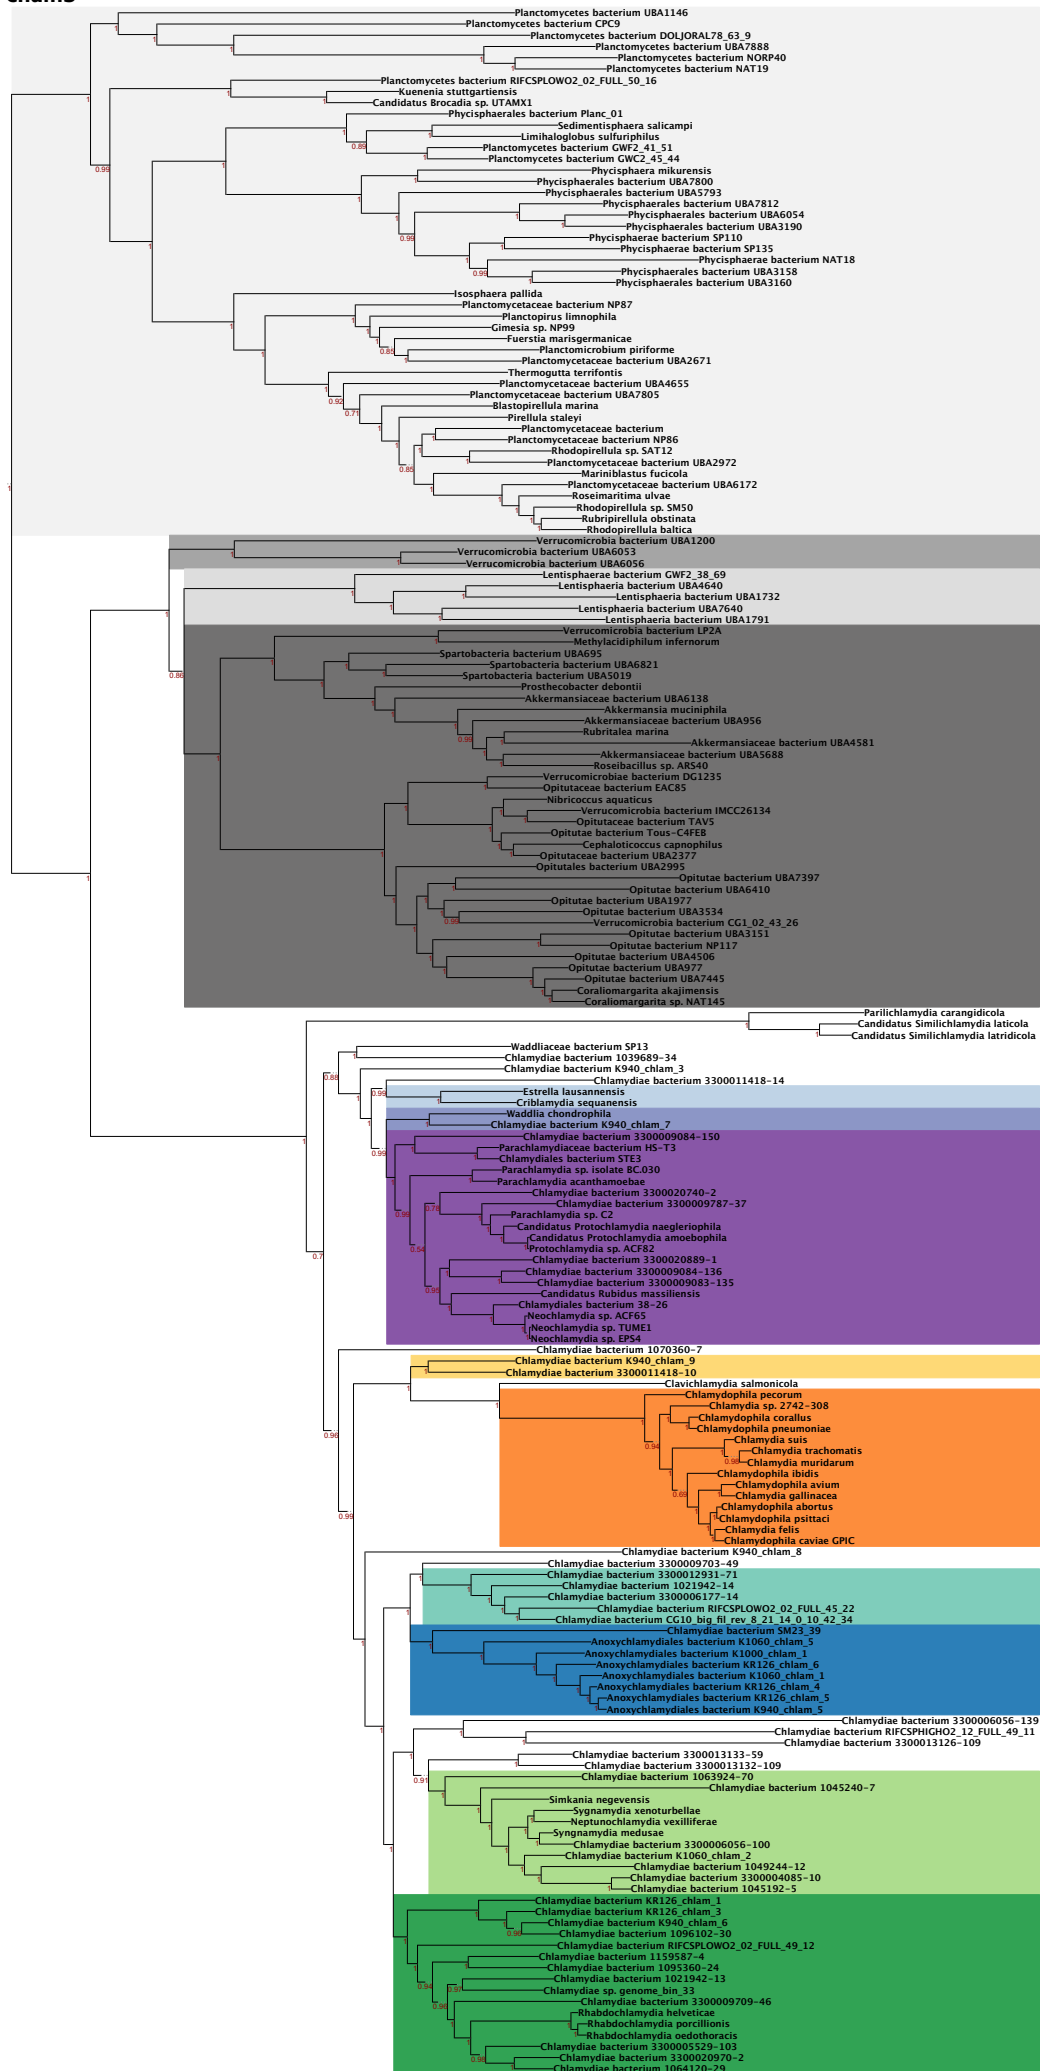

0.1







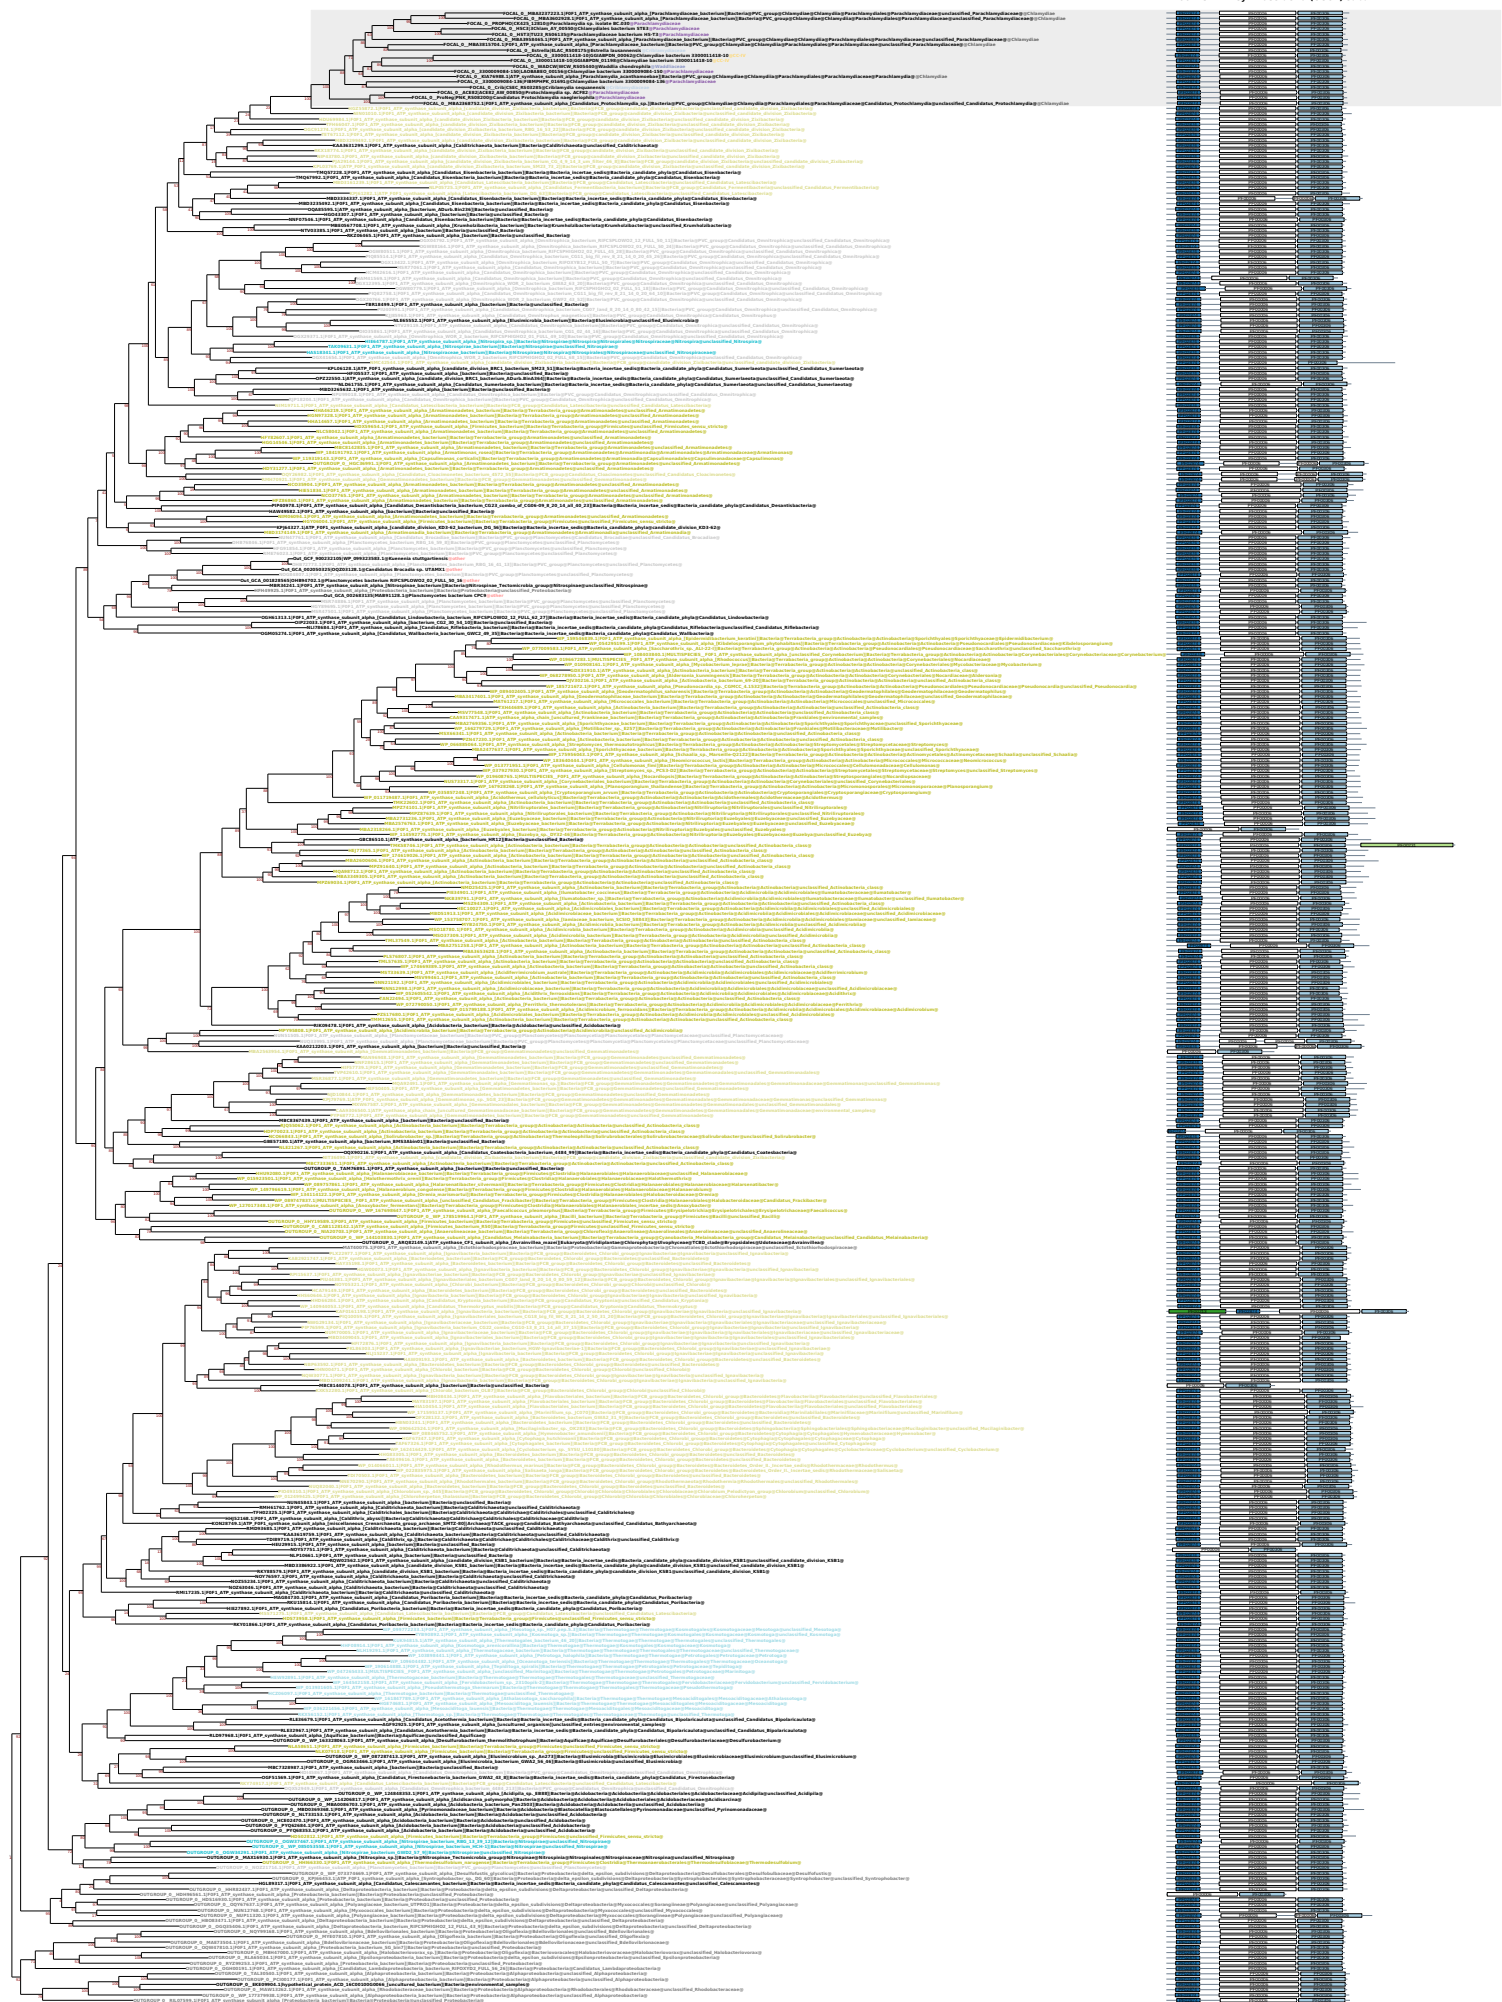

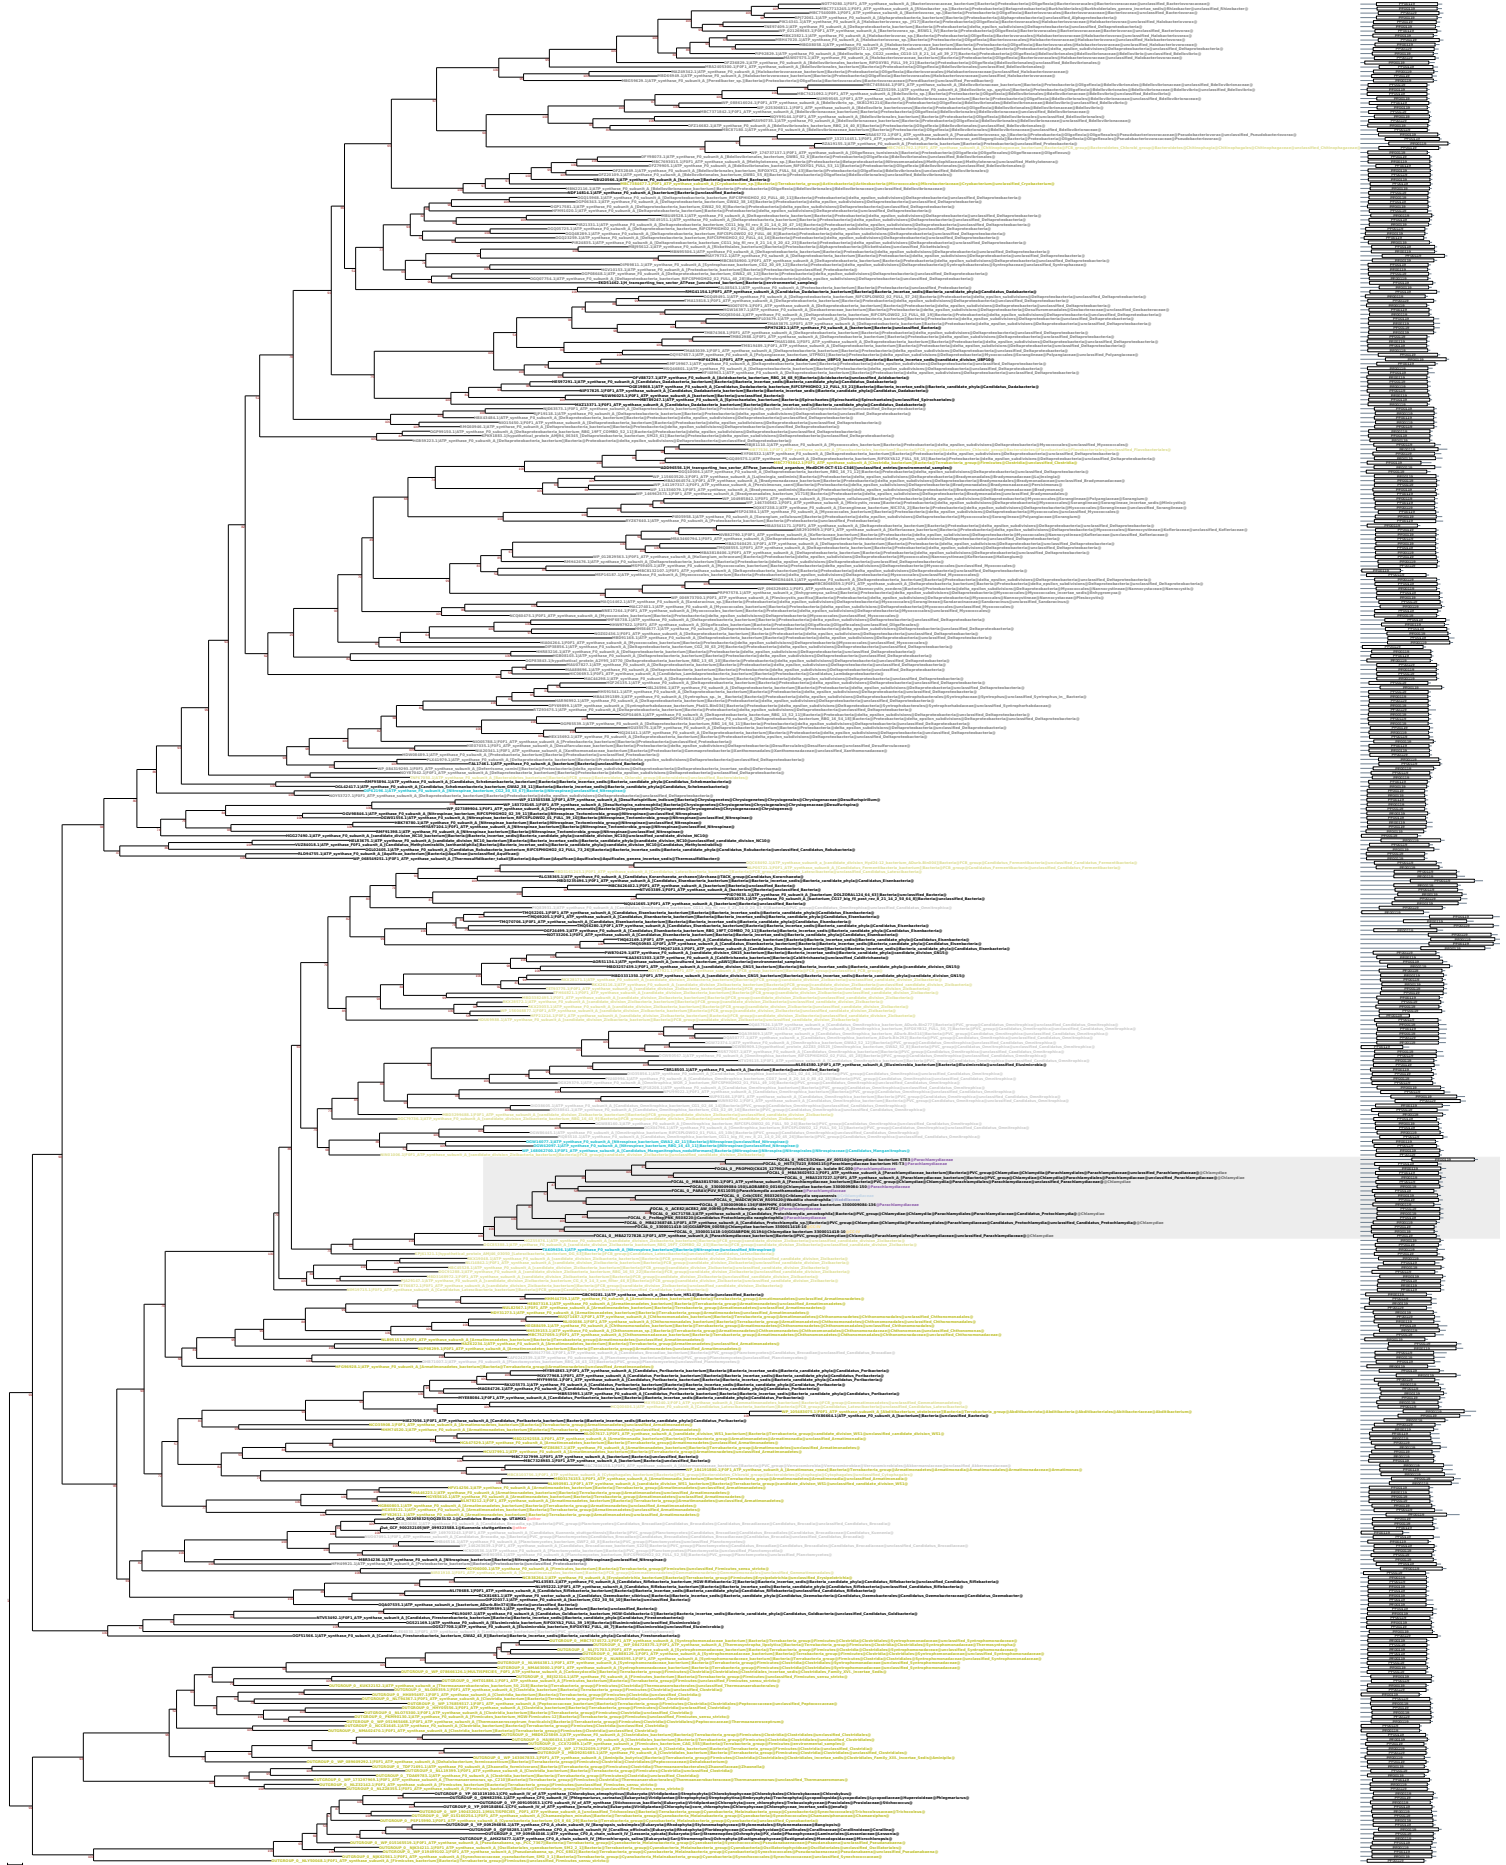



11Y2G  
49C  
402114  
F-type H<sup>+</sup>-transporting ATPase subunit epsilon

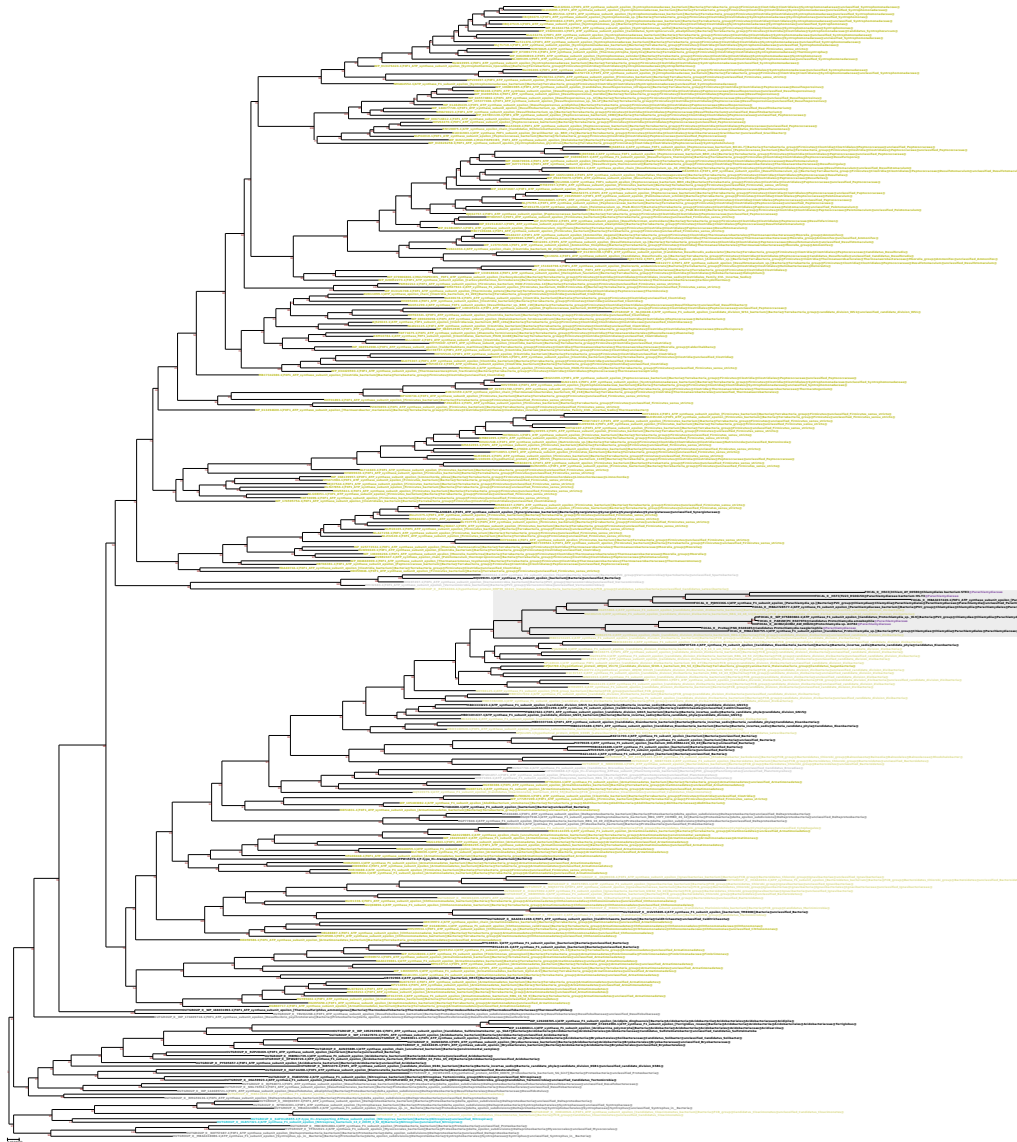

PF08621: ATP synthase, Delta/Epsilon chain, long alpha-helic domain  
PF02822: ATP synthase, Delta/Epsilon chain, beta sandwich domain

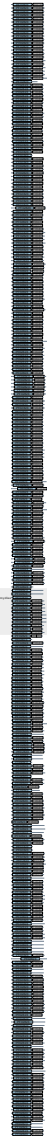

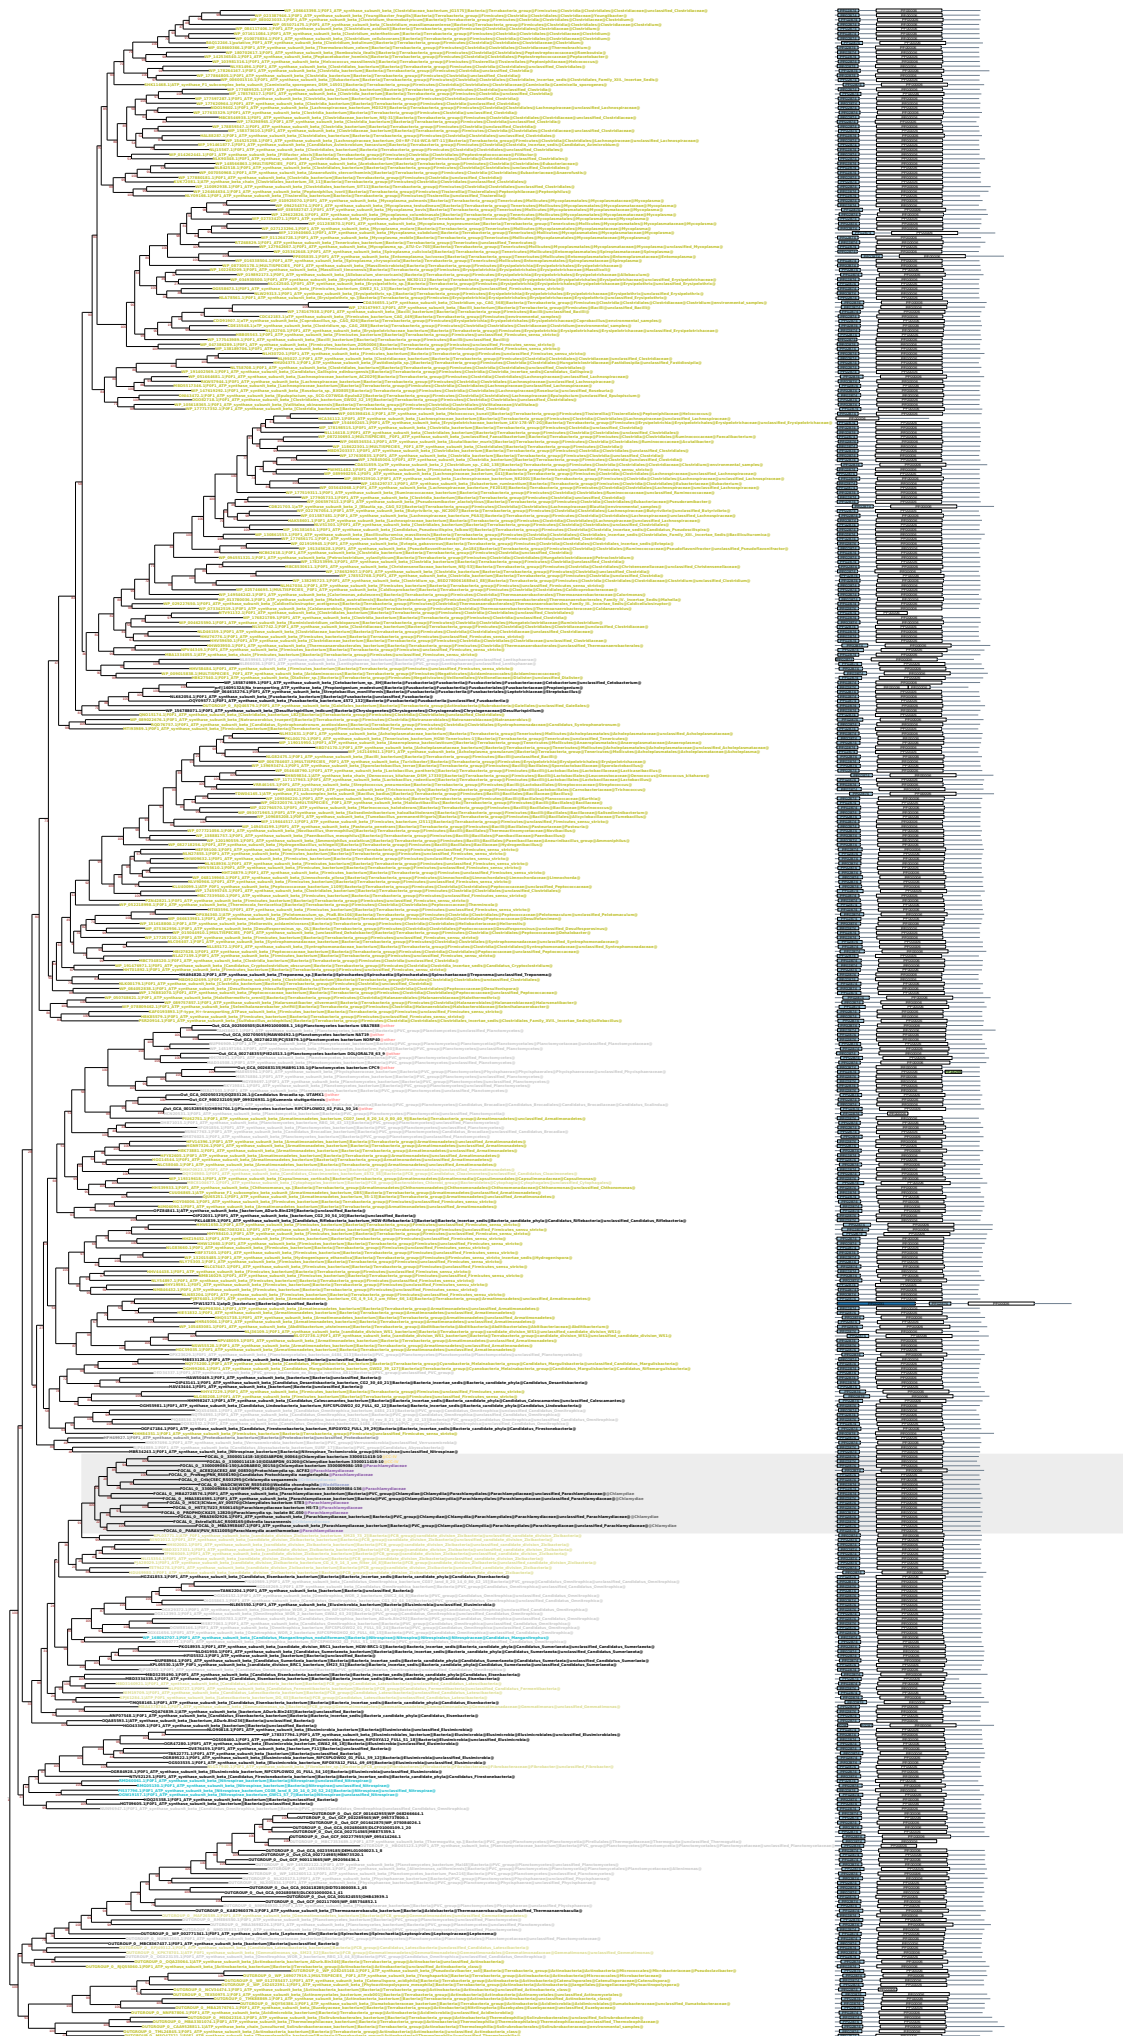

0246  
atp  
002110  
F-type H<sup>+</sup>-transporting ATPase subunit c

PF00117: ATP synthase subunit C  
PF00118: Intrins, domain 3

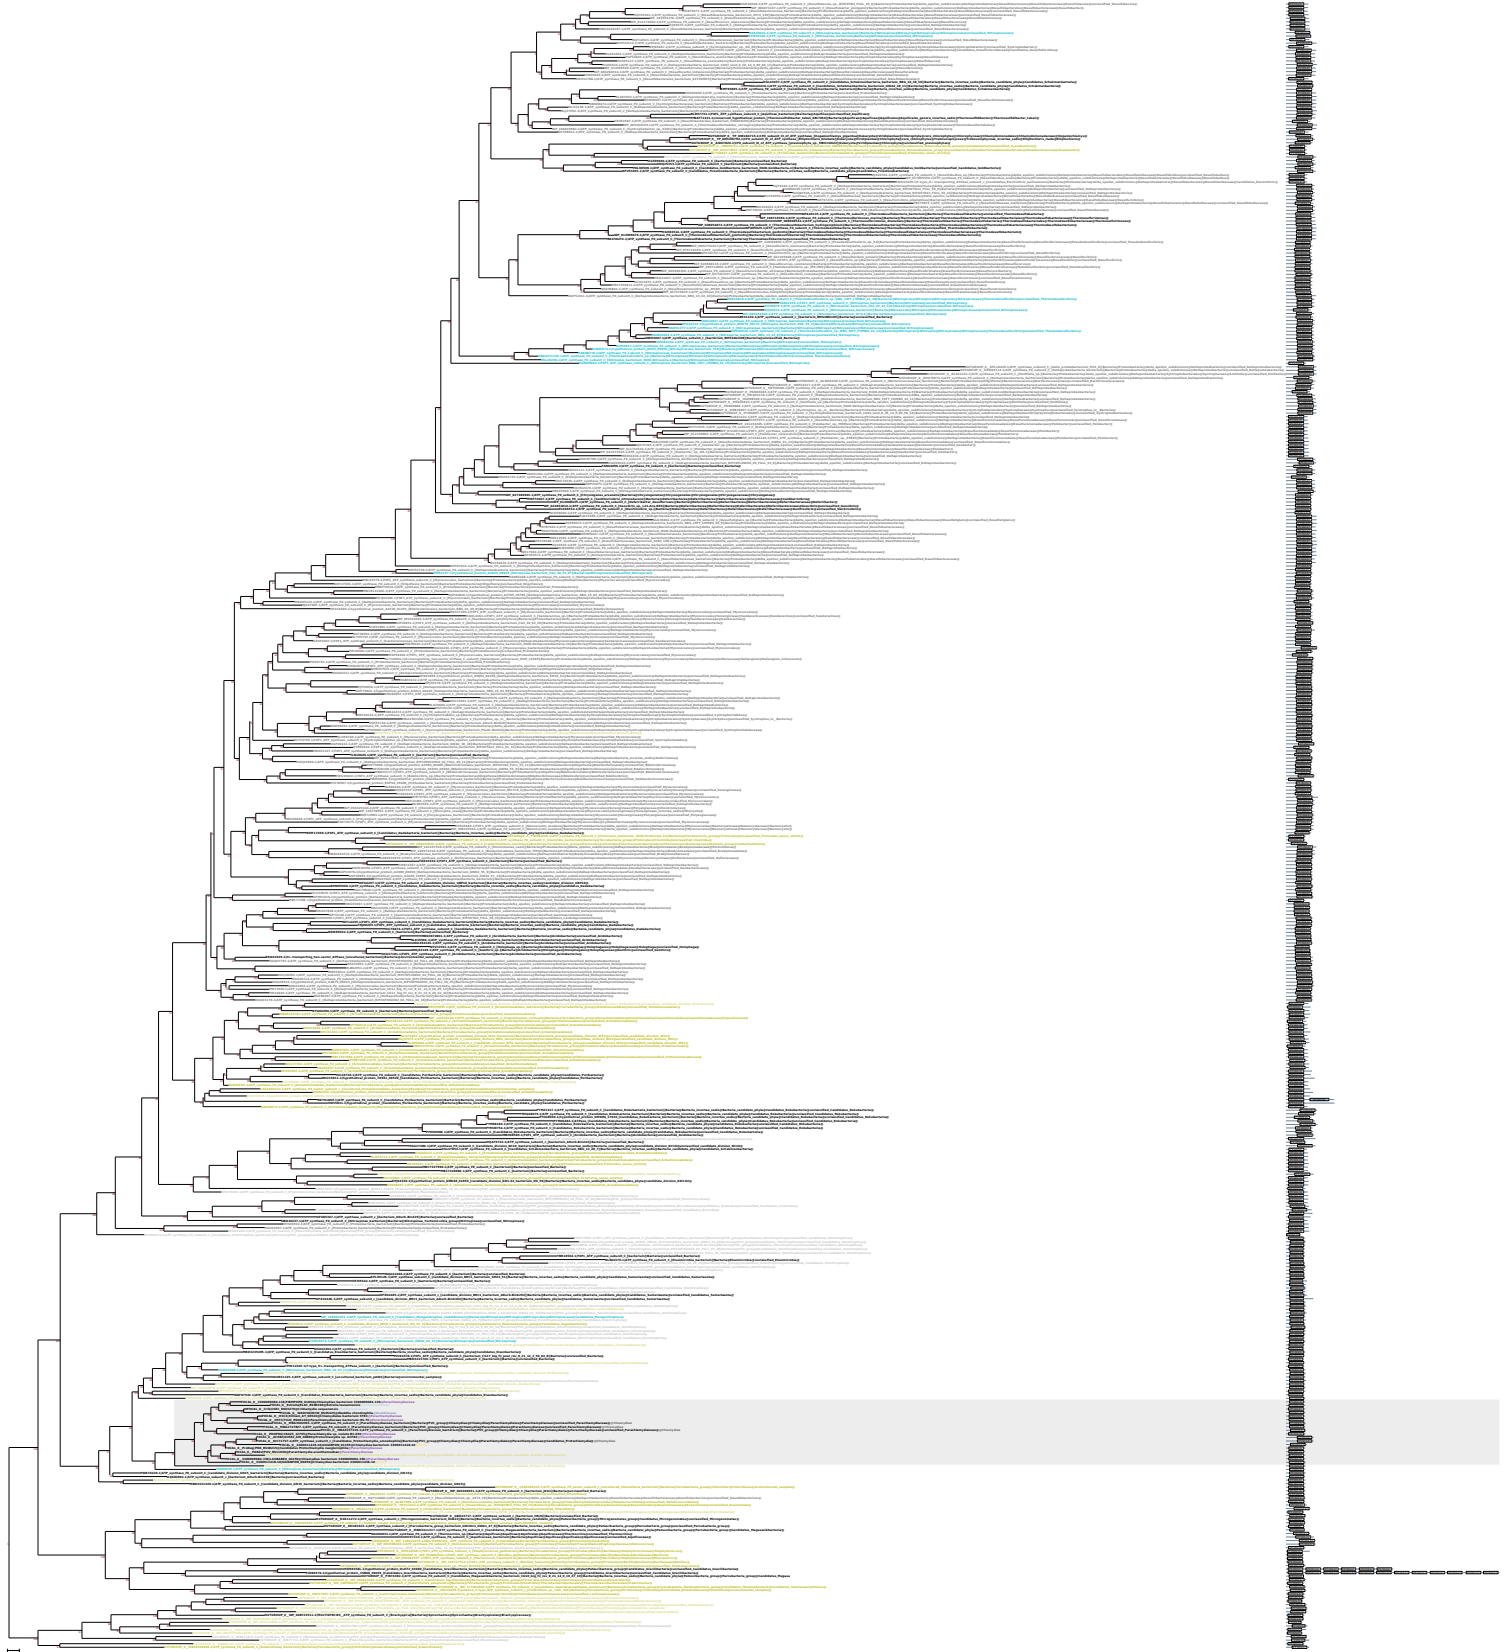

CG0711  
atpF  
K02109  
F-type H<sup>+</sup>-transporting ATPase subunit b

PF00430: ATP synthase B/B' CF0  
PF02115: ATP synthase delta (OSCF1) subunit  
PF04380: Papillase family M28

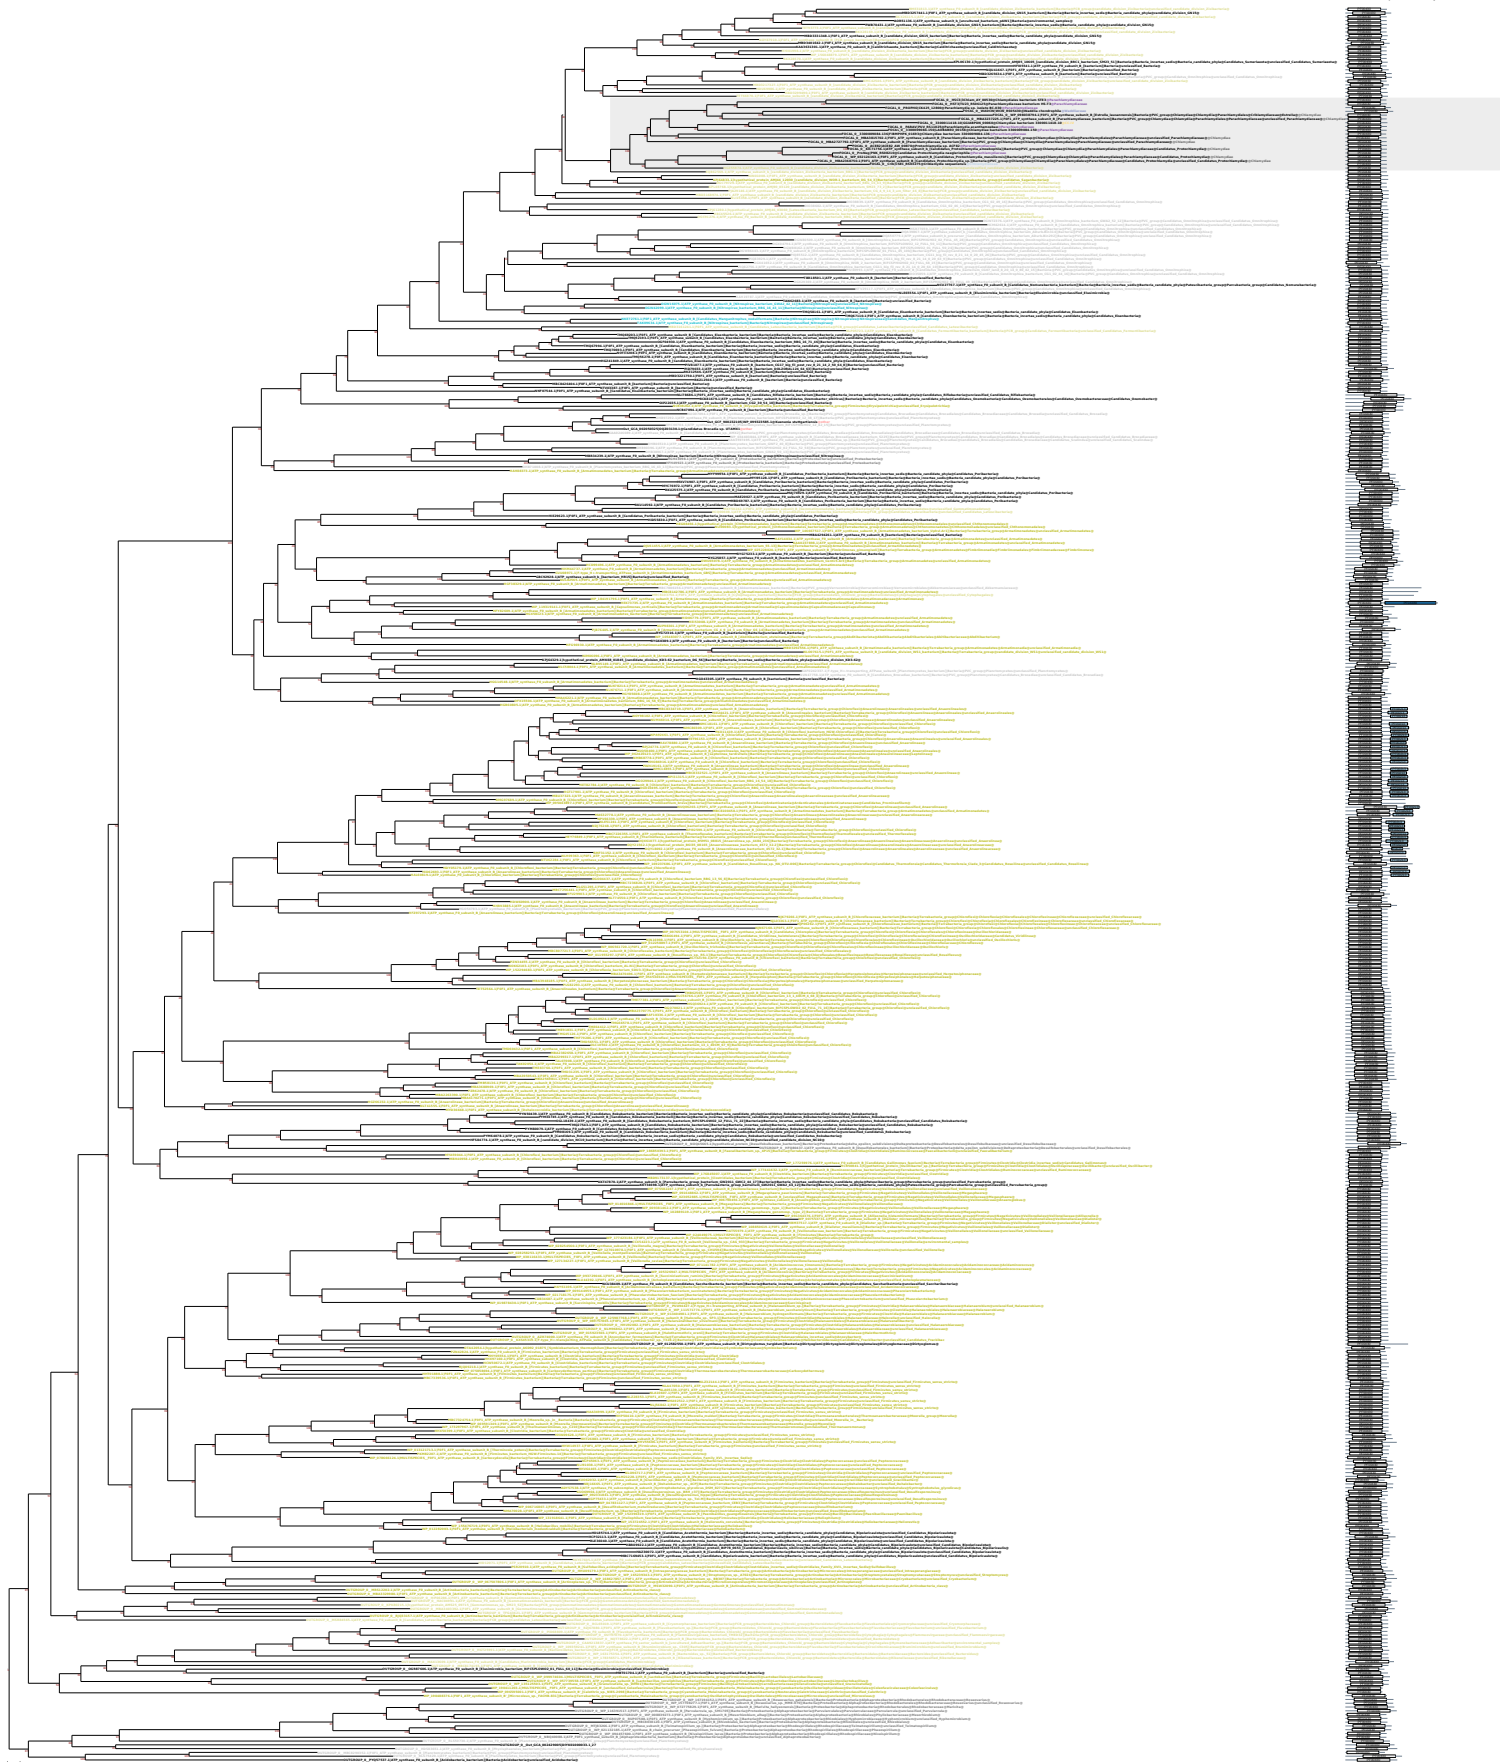



COG0712  
atpH  
F-type H<sup>+</sup>-transporting ATPase subunit delta

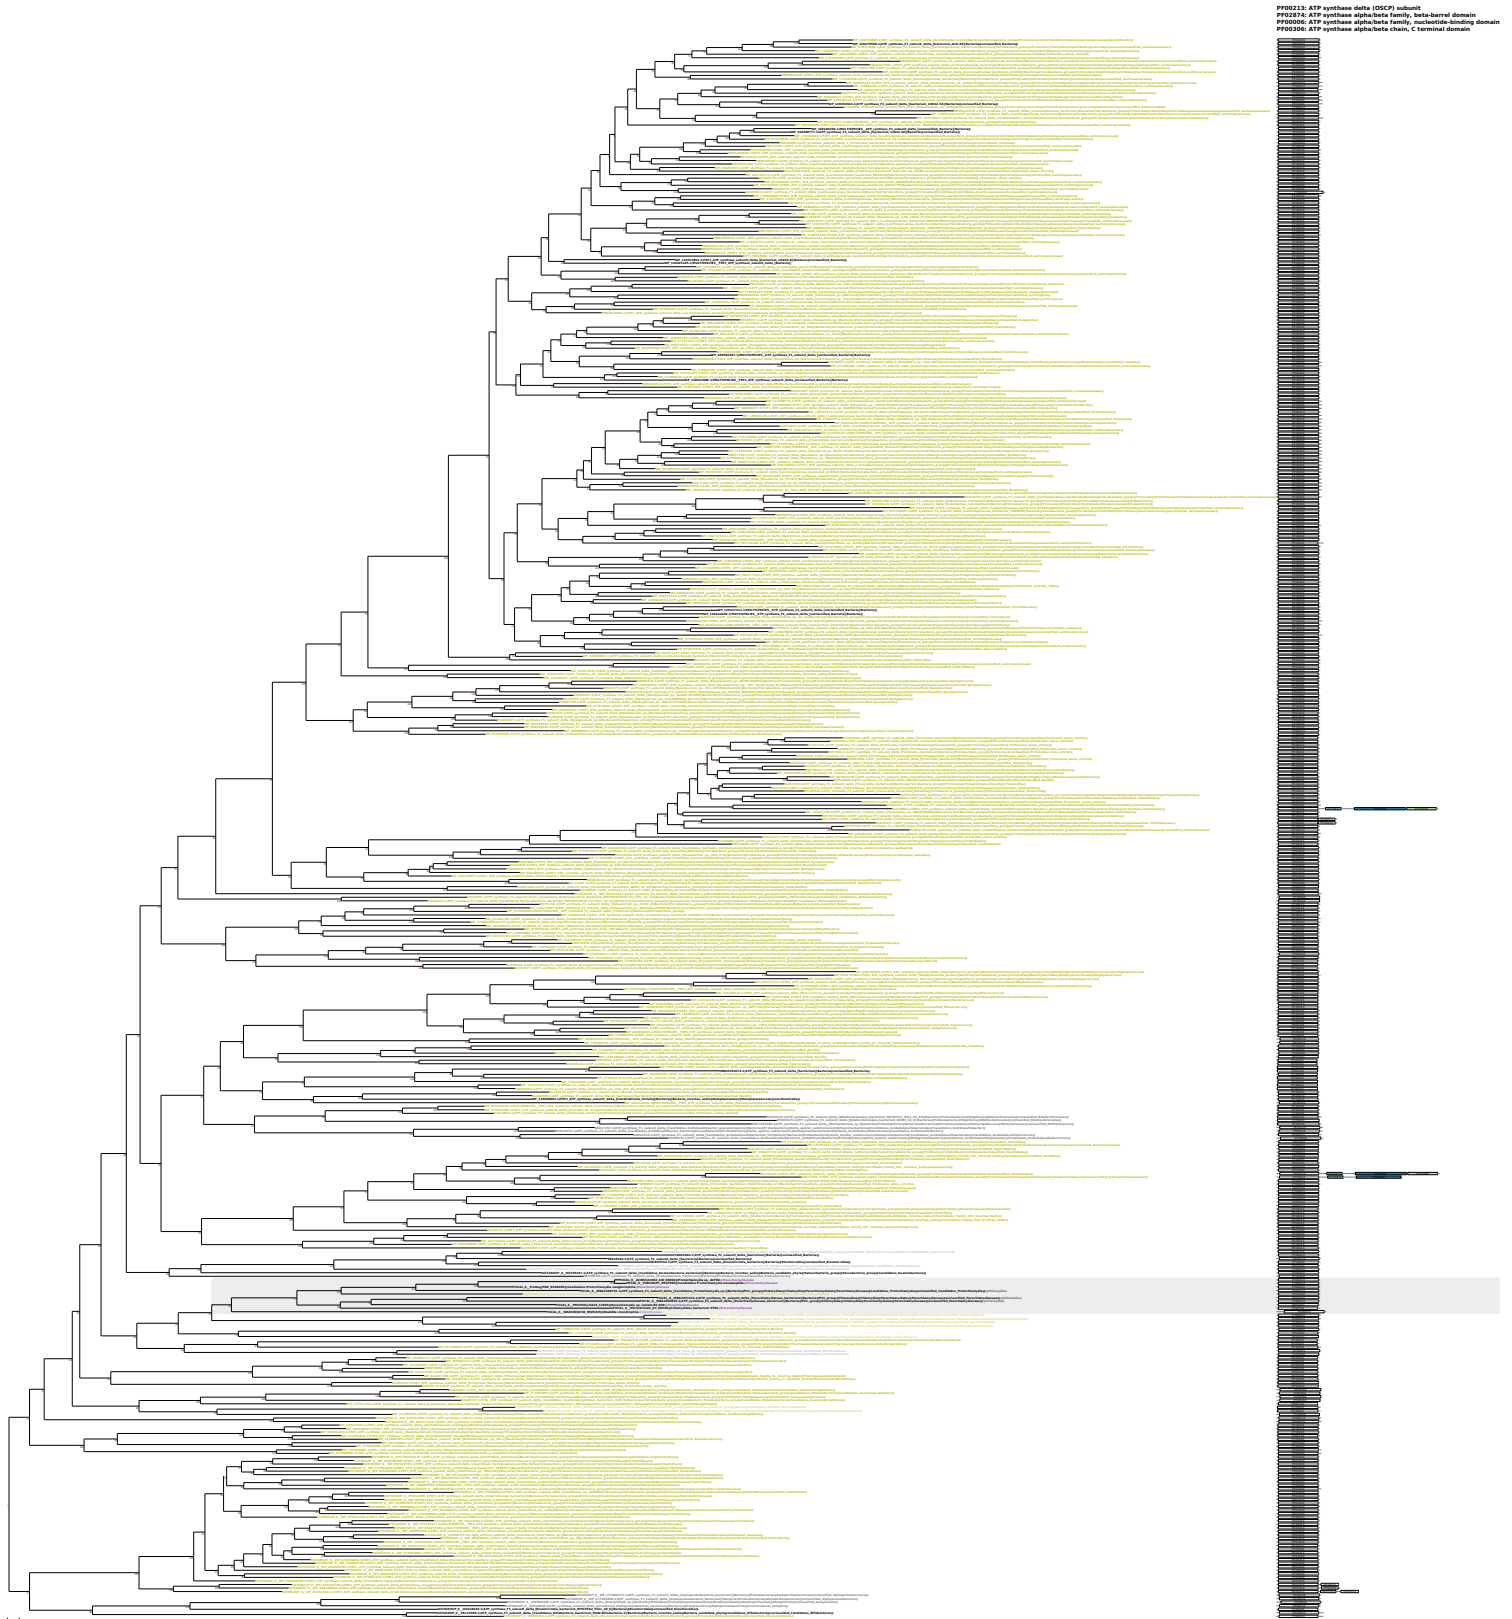

PF00213: ATP synthase delta (OSCP) subunit  
PF02376: ATP synthase alpha/beta family, beta-barrel domain  
PF00006: ATP synthase alpha/beta family, nucleotide-binding domain  
PF00206: ATP synthase alpha/beta chain, C-terminal domain

COG1622  
cyaA  
K02297  
cytochrome o ubiquinol oxidase subunit II

PF06481: COX Aromatic Rich Motif  
PF02790: Cytochrome C oxidase subunit II, transmembrane domain  
PF00116: Cytochrome C oxidase subunit II, periplasmic domain

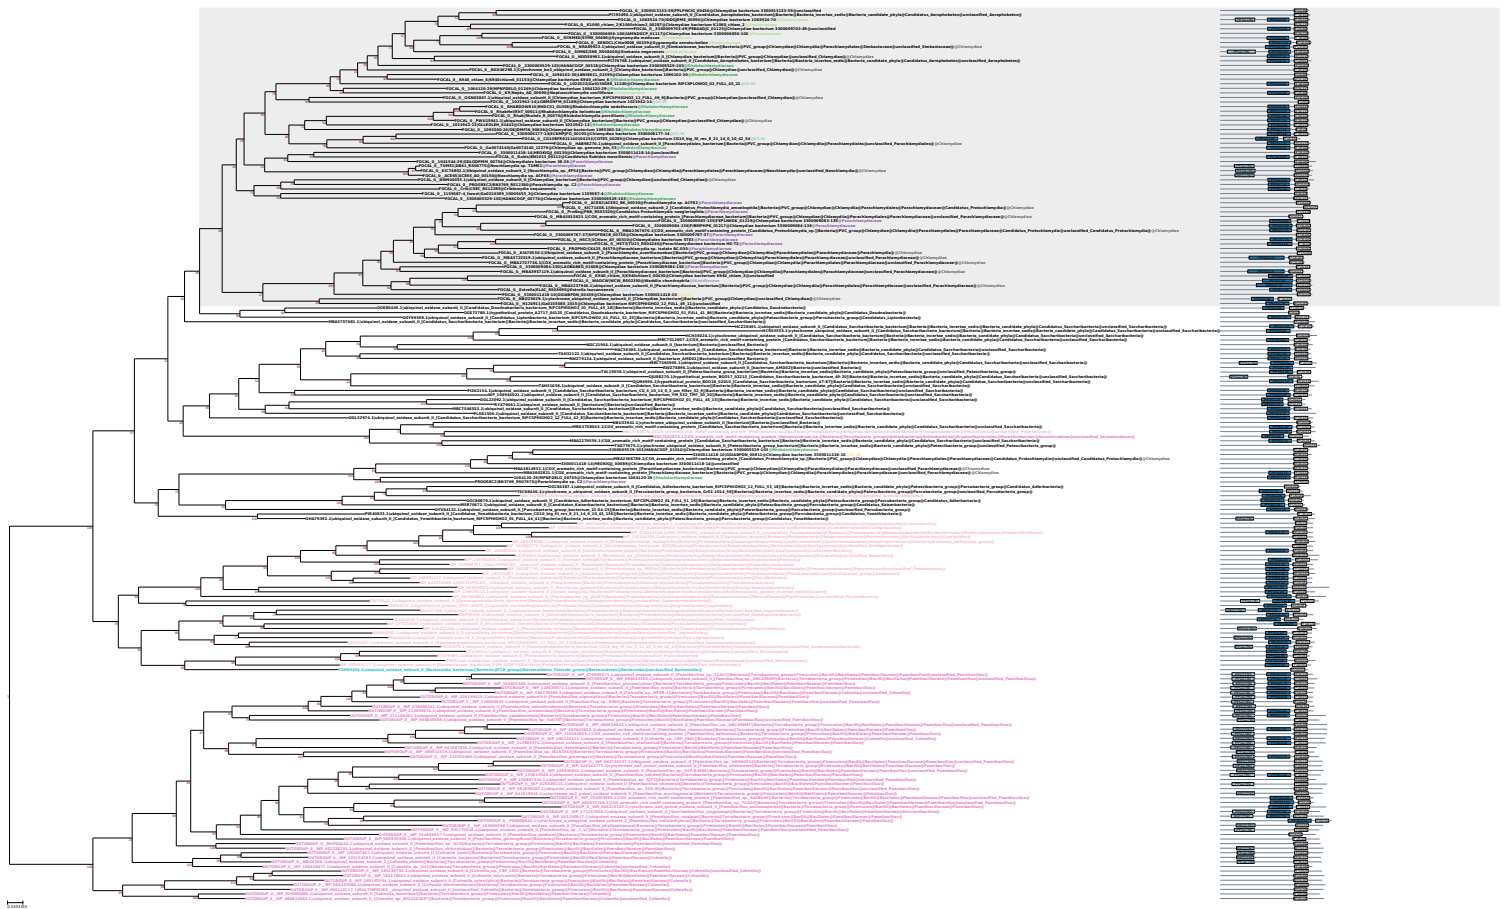

COG0843  
cyb  
K02298  
cytochrome o ubiquinol oxidase subunit I

PF00115: Cytochrome C and Quinol oxidase polypeptide I  
PF12270: Cytochrome c oxidase subunit IV  
PF00510: Cytochrome c oxidase subunit III  
PF08491: COX Aromatic Rich Motif

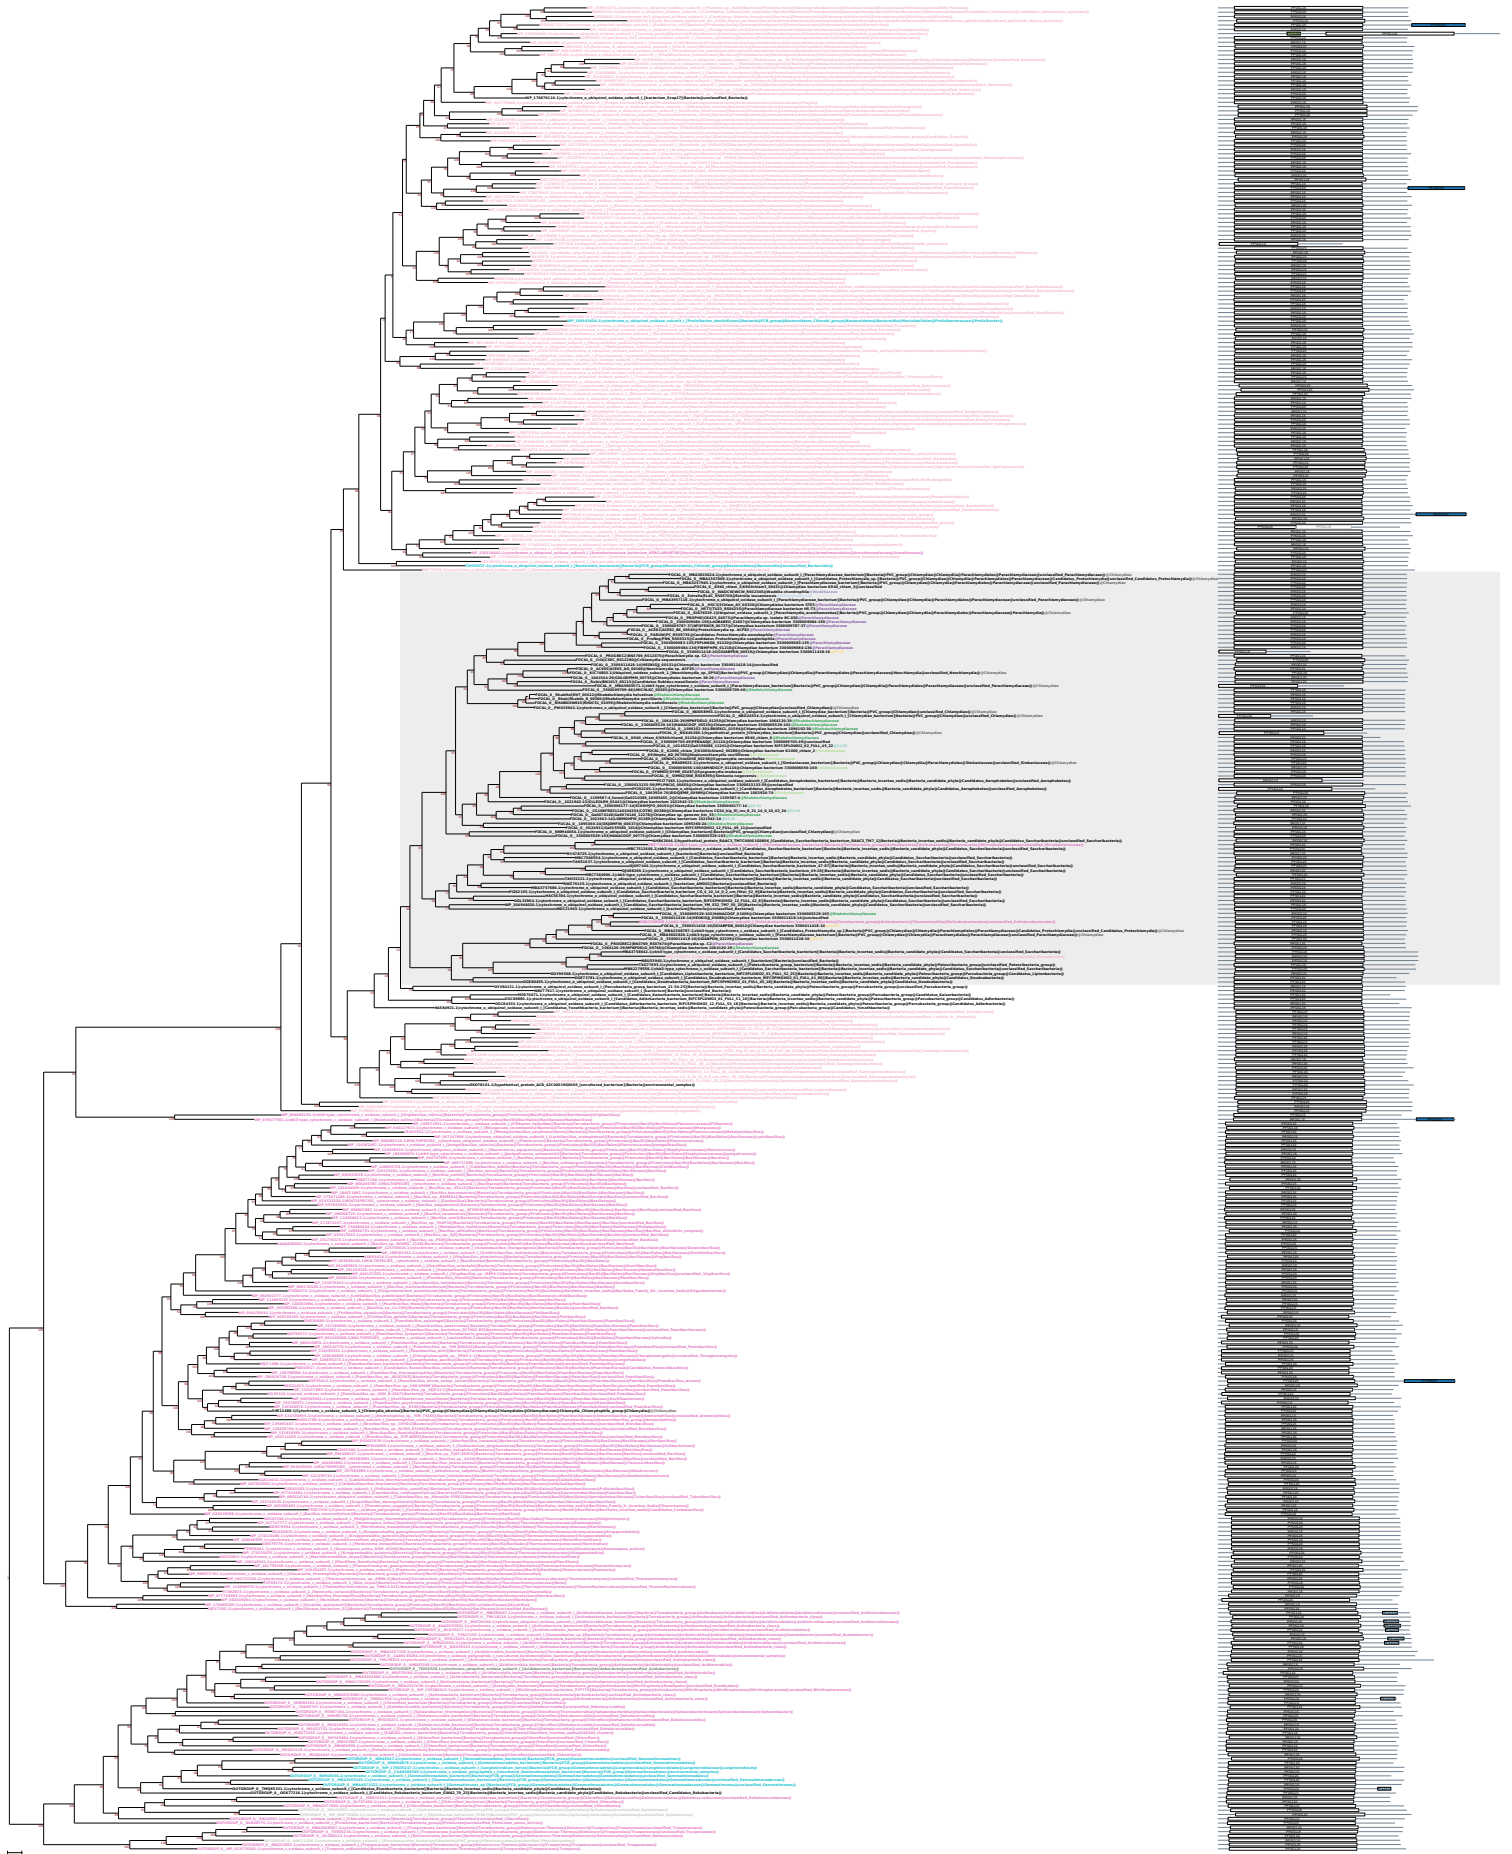

COG1845  
cyoC  
K02239  
cytochrome o ubiquinol oxidase subunit III

PF00510: Cytochrome c oxidase subunit III  
PF03626: Prokaryotic Cytochrome C oxidase subunit IV

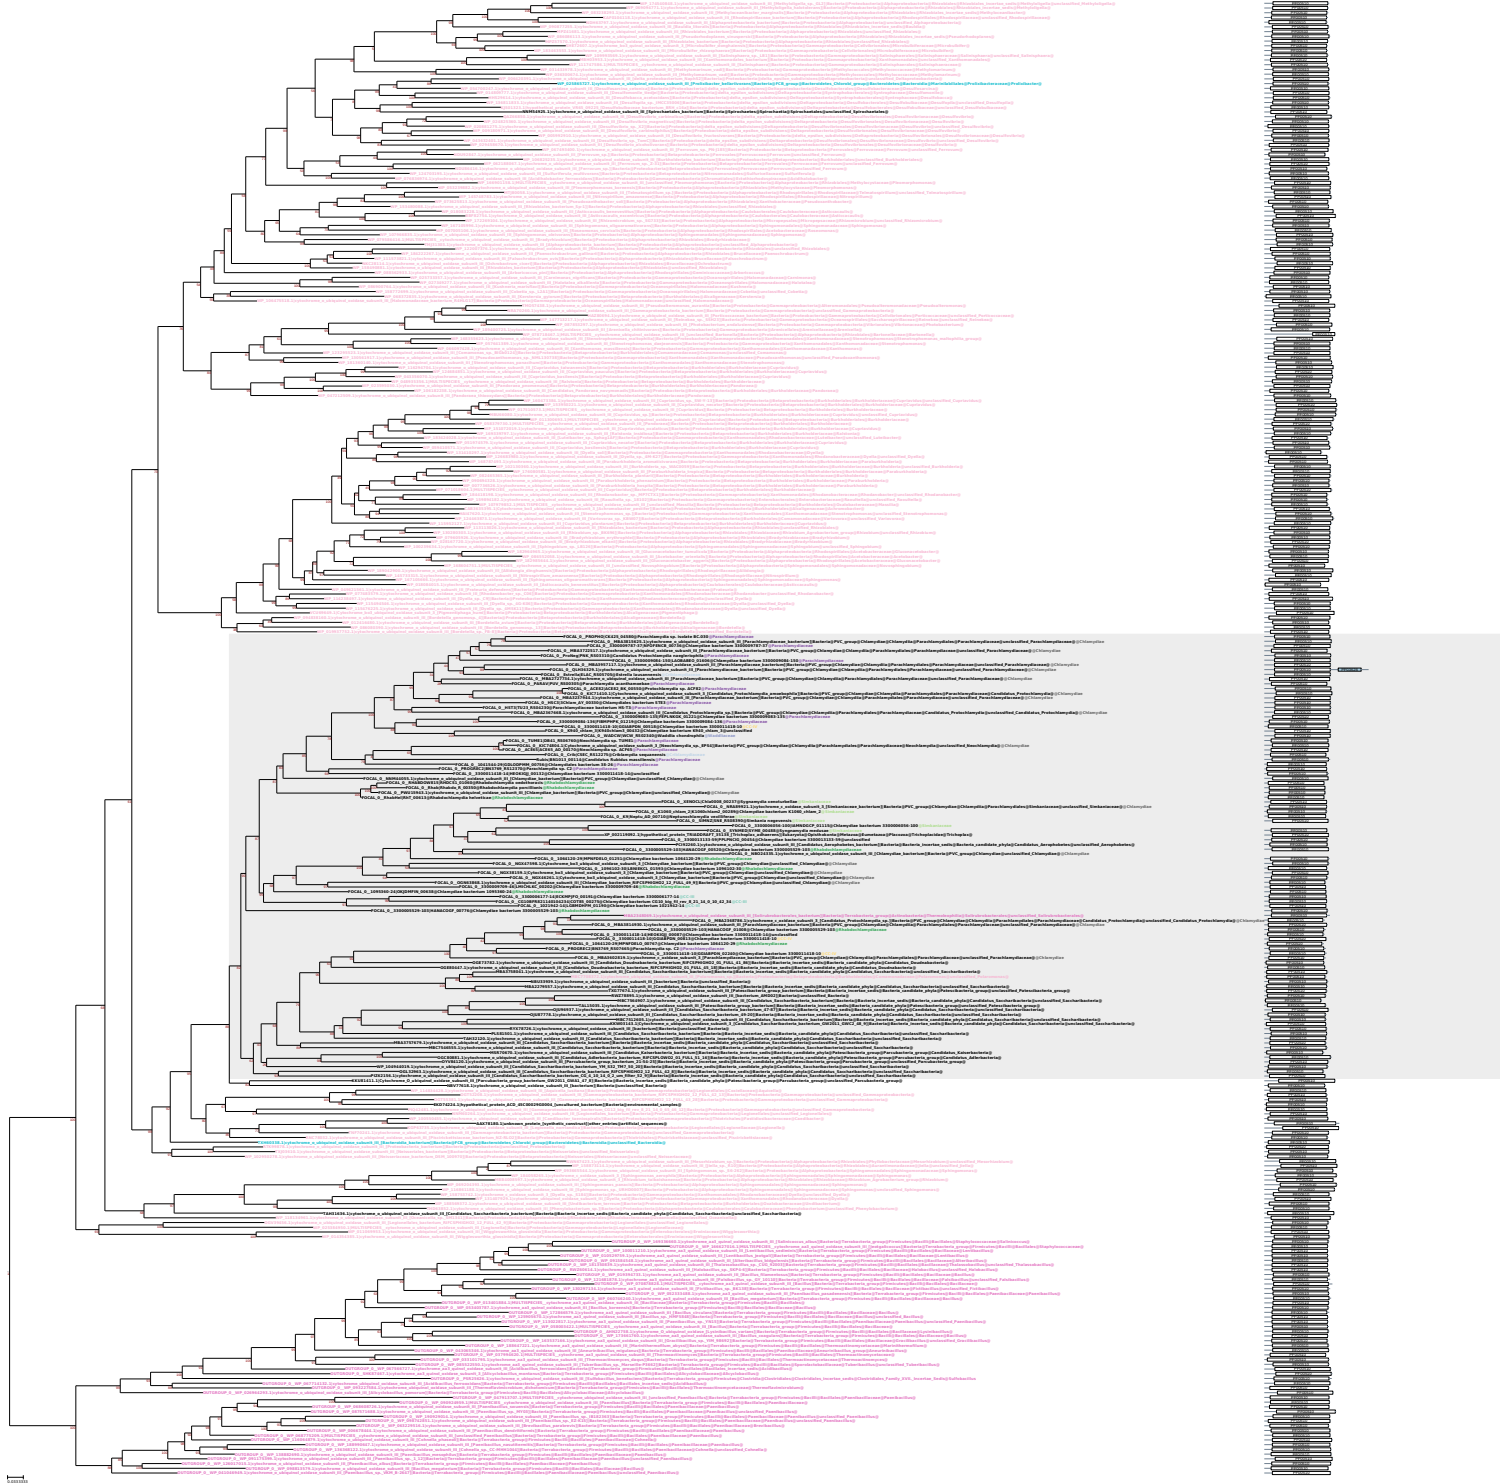



COG3125  
cyd  
K02390  
cytochrome o ubiquinol oxidase subunit IV

PF03626: Prokaryotic Cytochrome C oxidase subunit IV

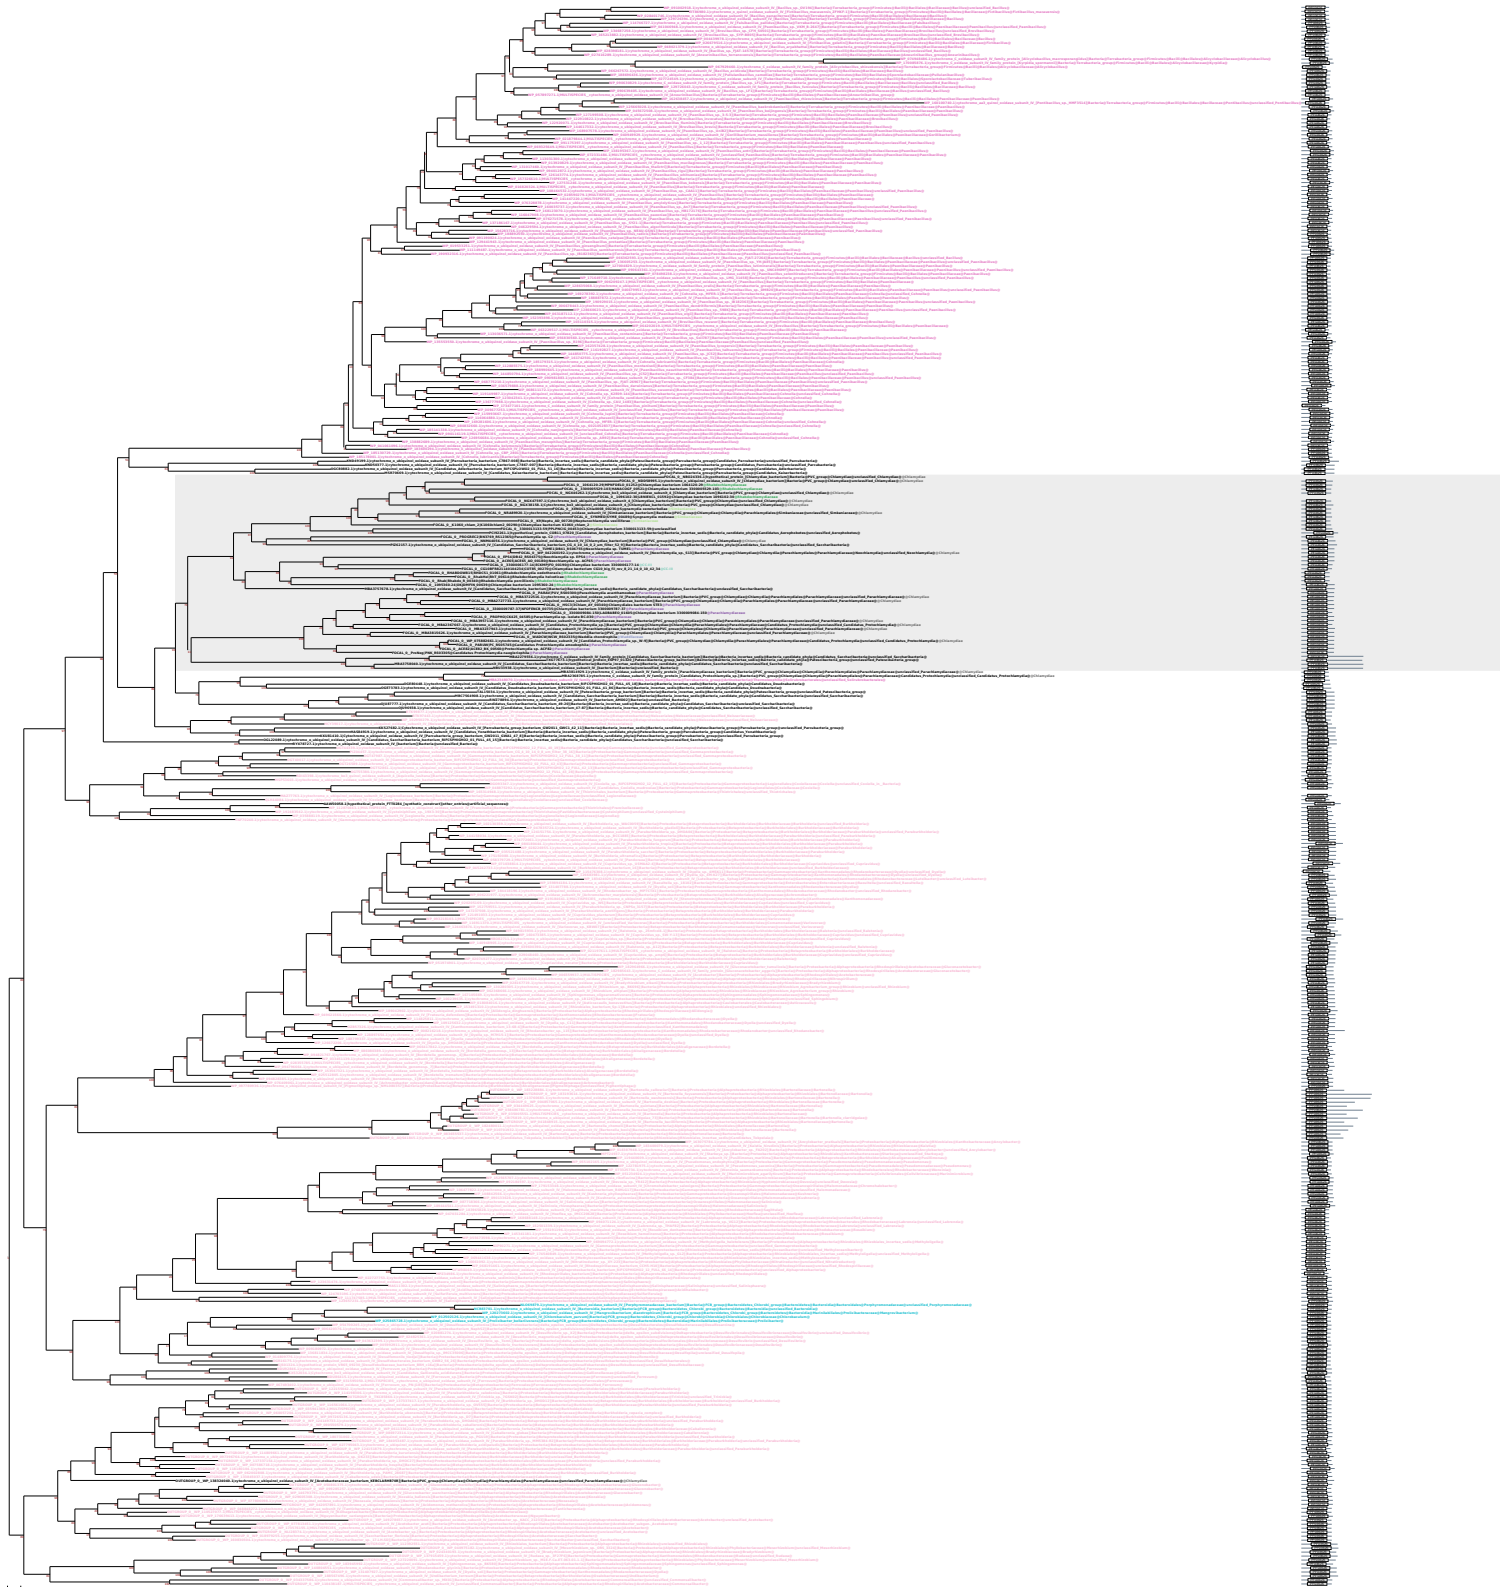

COG0838  
ruoA  
K00330  
NADH-quinone oxidoreductase subunit A

PF00507: NADH-ubiquinone/plastoquinone oxidoreductase, chain 3

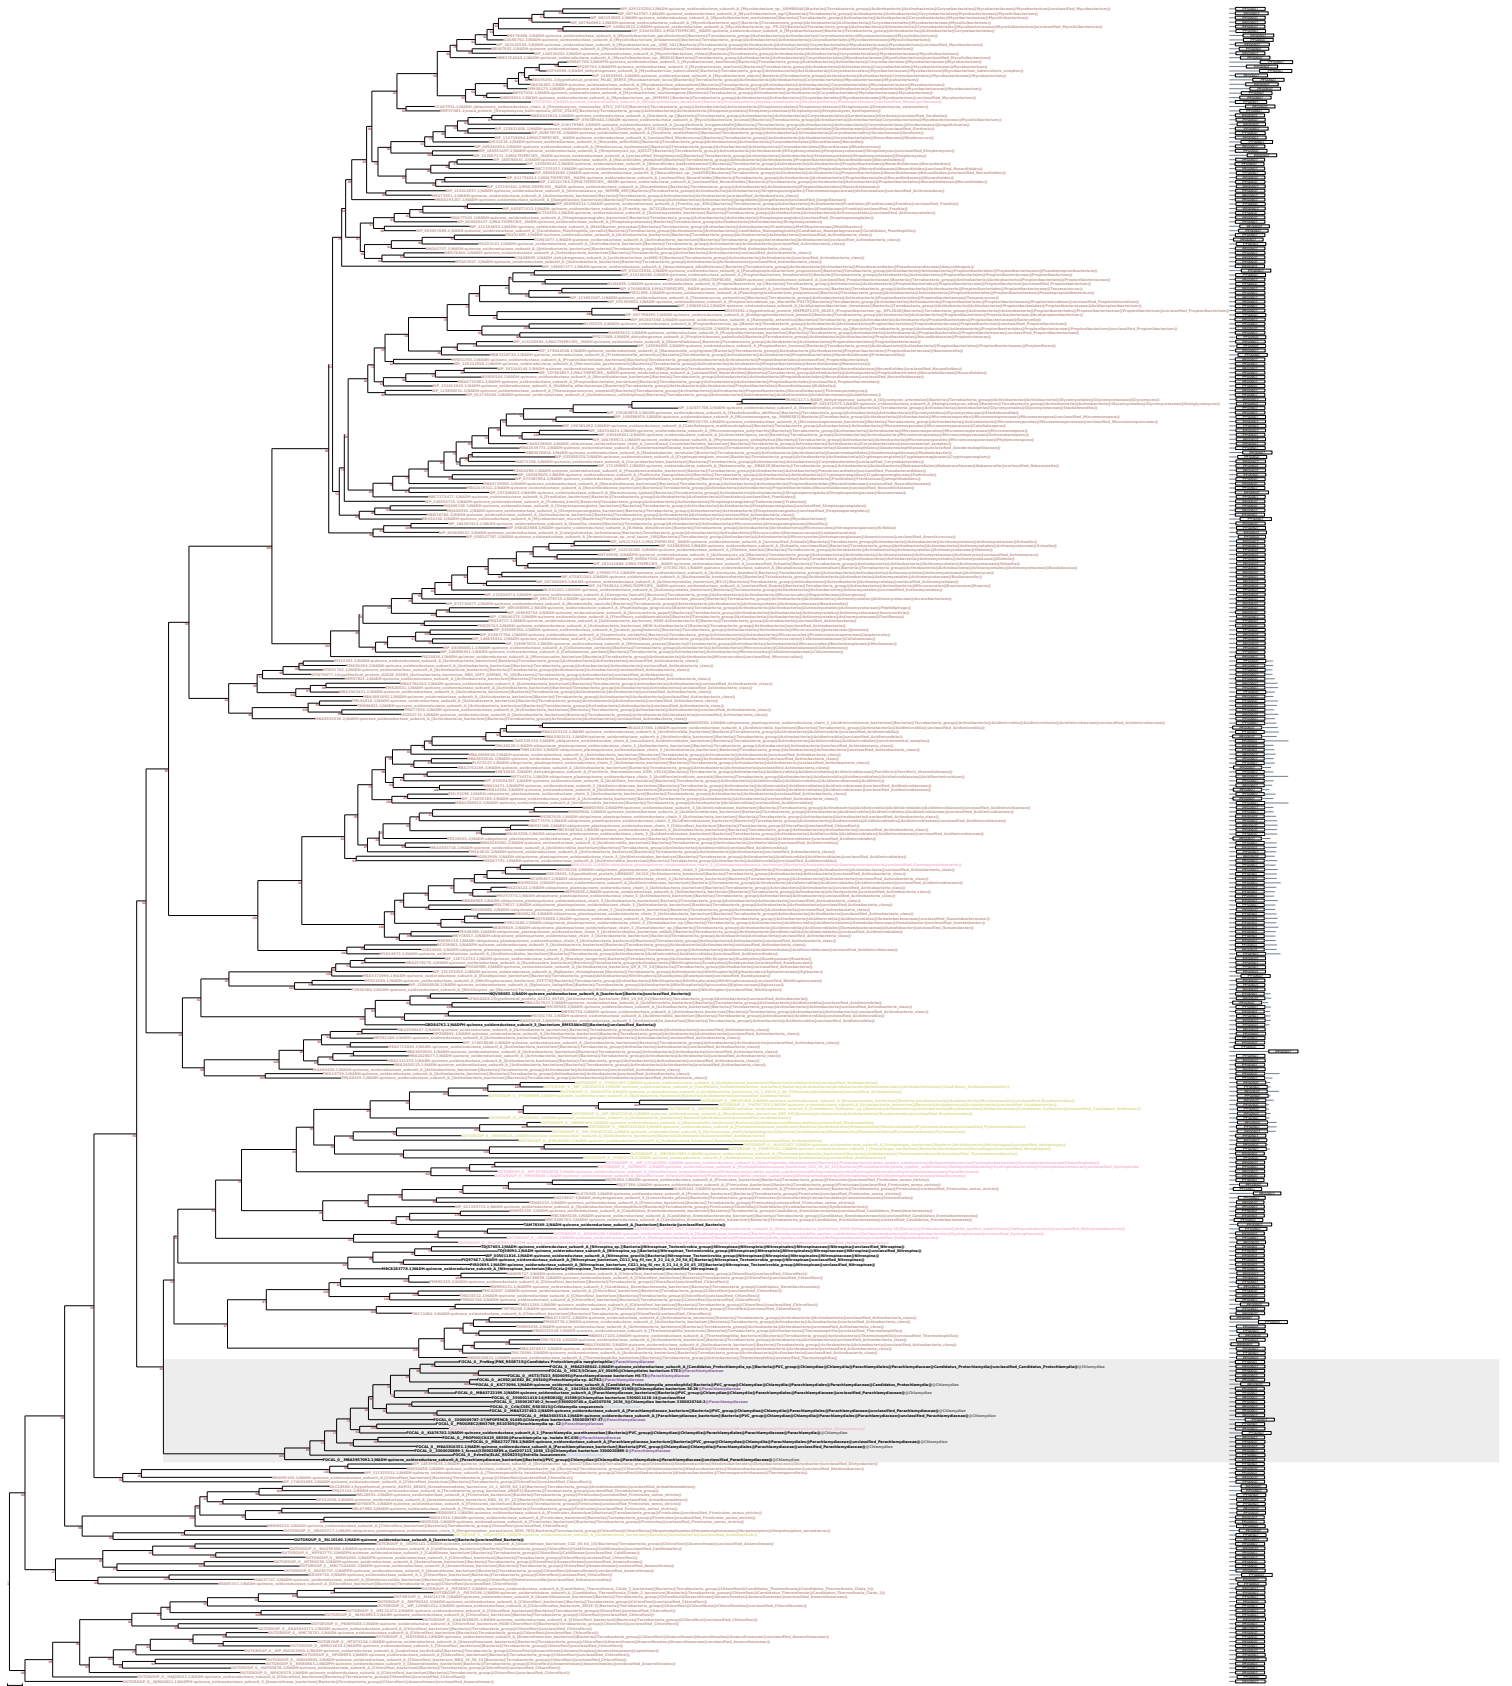

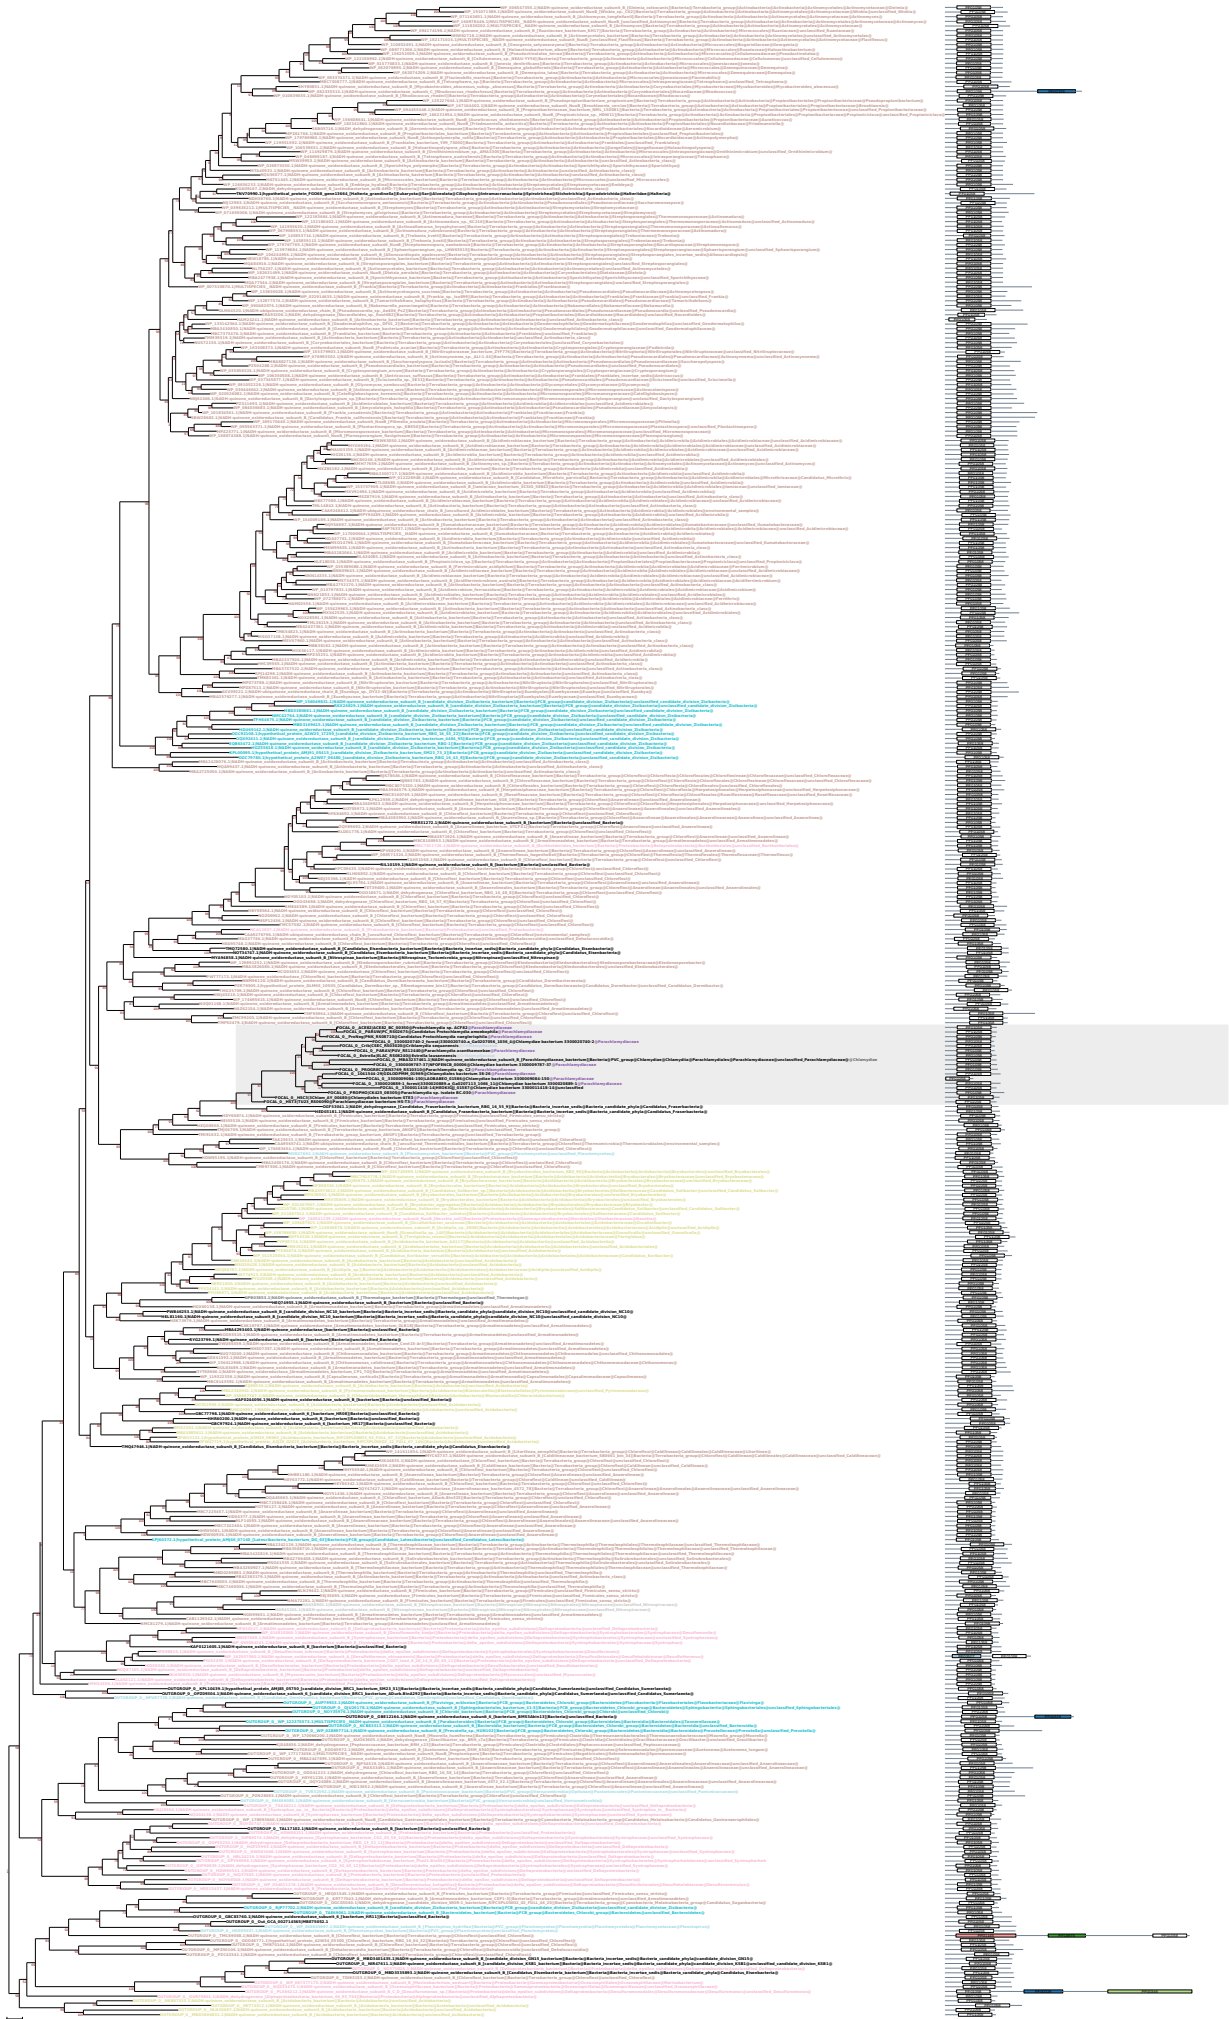

COG0852  
RuqC  
K00332  
NADH-quinone oxidoreductase subunit C

PF00229: Respiratory-chain NADH dehydrogenase, 30 kD subunit  
PF00344: Respiratory-chain NADH dehydrogenase, 49 kD subunit  
PF02774: NiS4-dependent hydrogenase  
PF01257: Thioesterase-like [2Fe-2S] ferredoxin

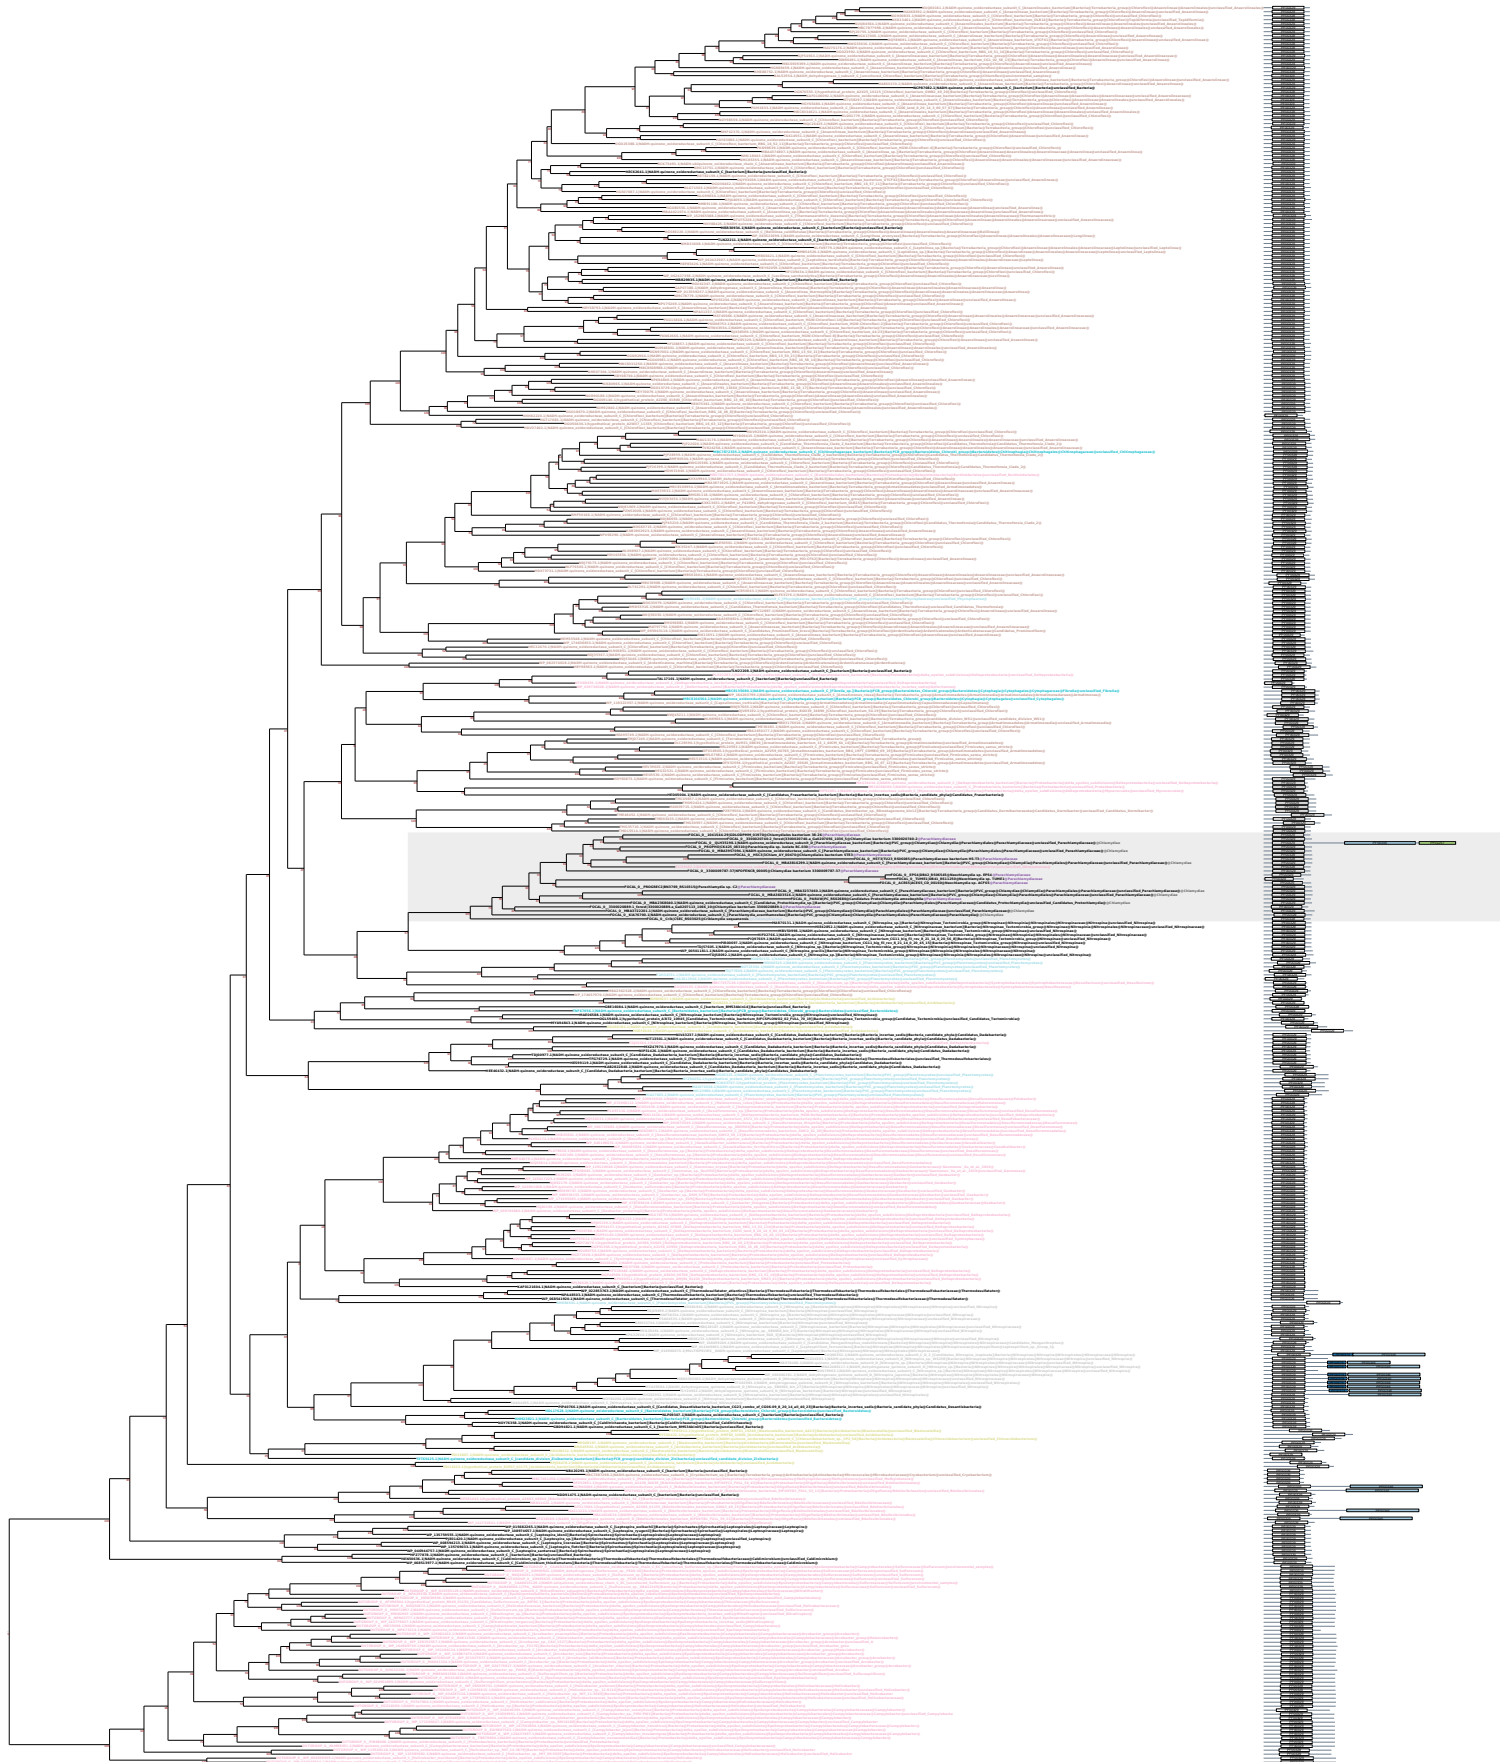



COG0649  
nuoD  
K00333  
NADH-quinone oxidoreductase subunit D

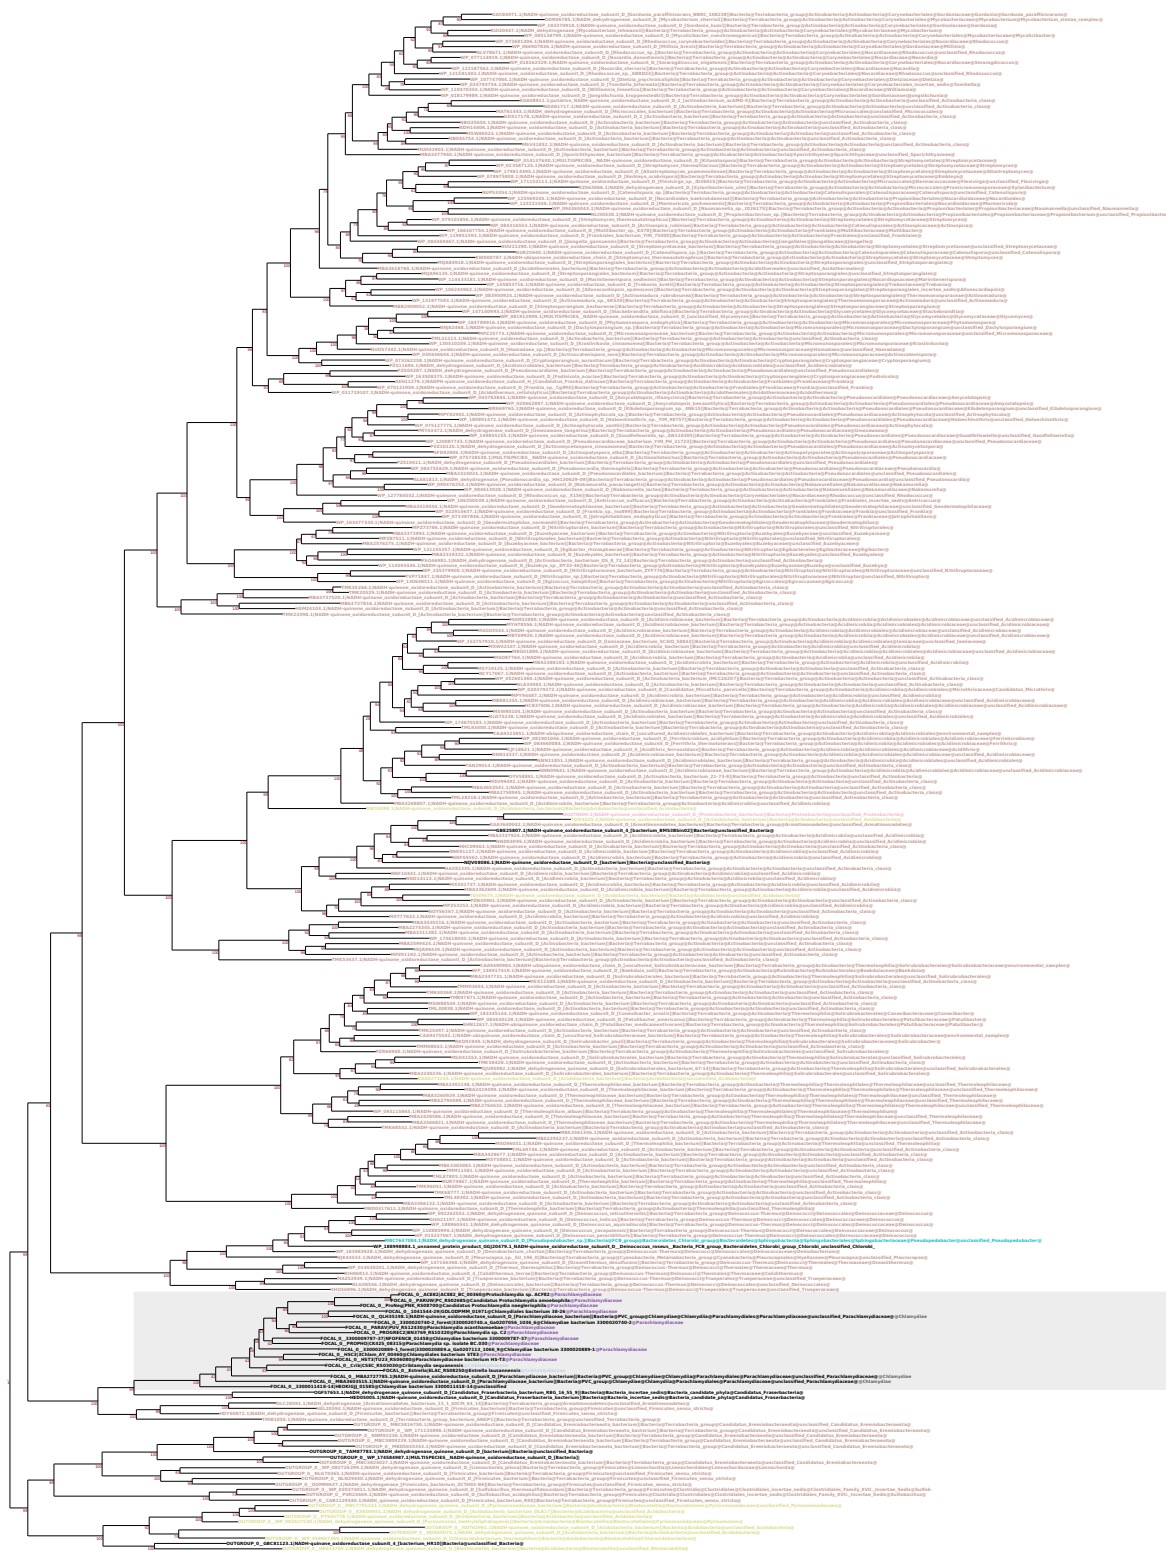

PF00346: Respiratory-chain NADH dehydrogenase, 49 Kd subunit  
PF01257: Thioredoxin-like [Fe-S] ferredoxin  
PF00329: Respiratory-chain NADH dehydrogenase, 30 Kd subunit

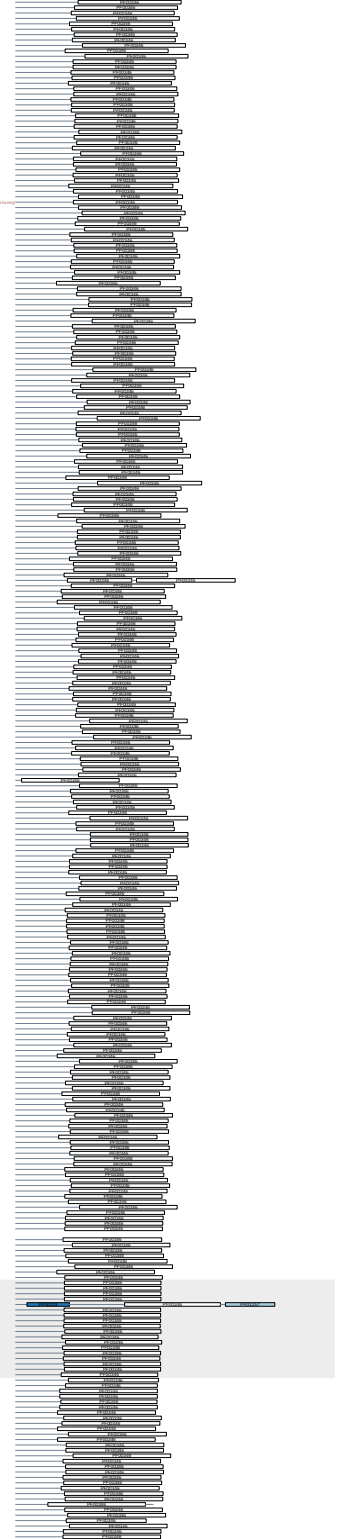



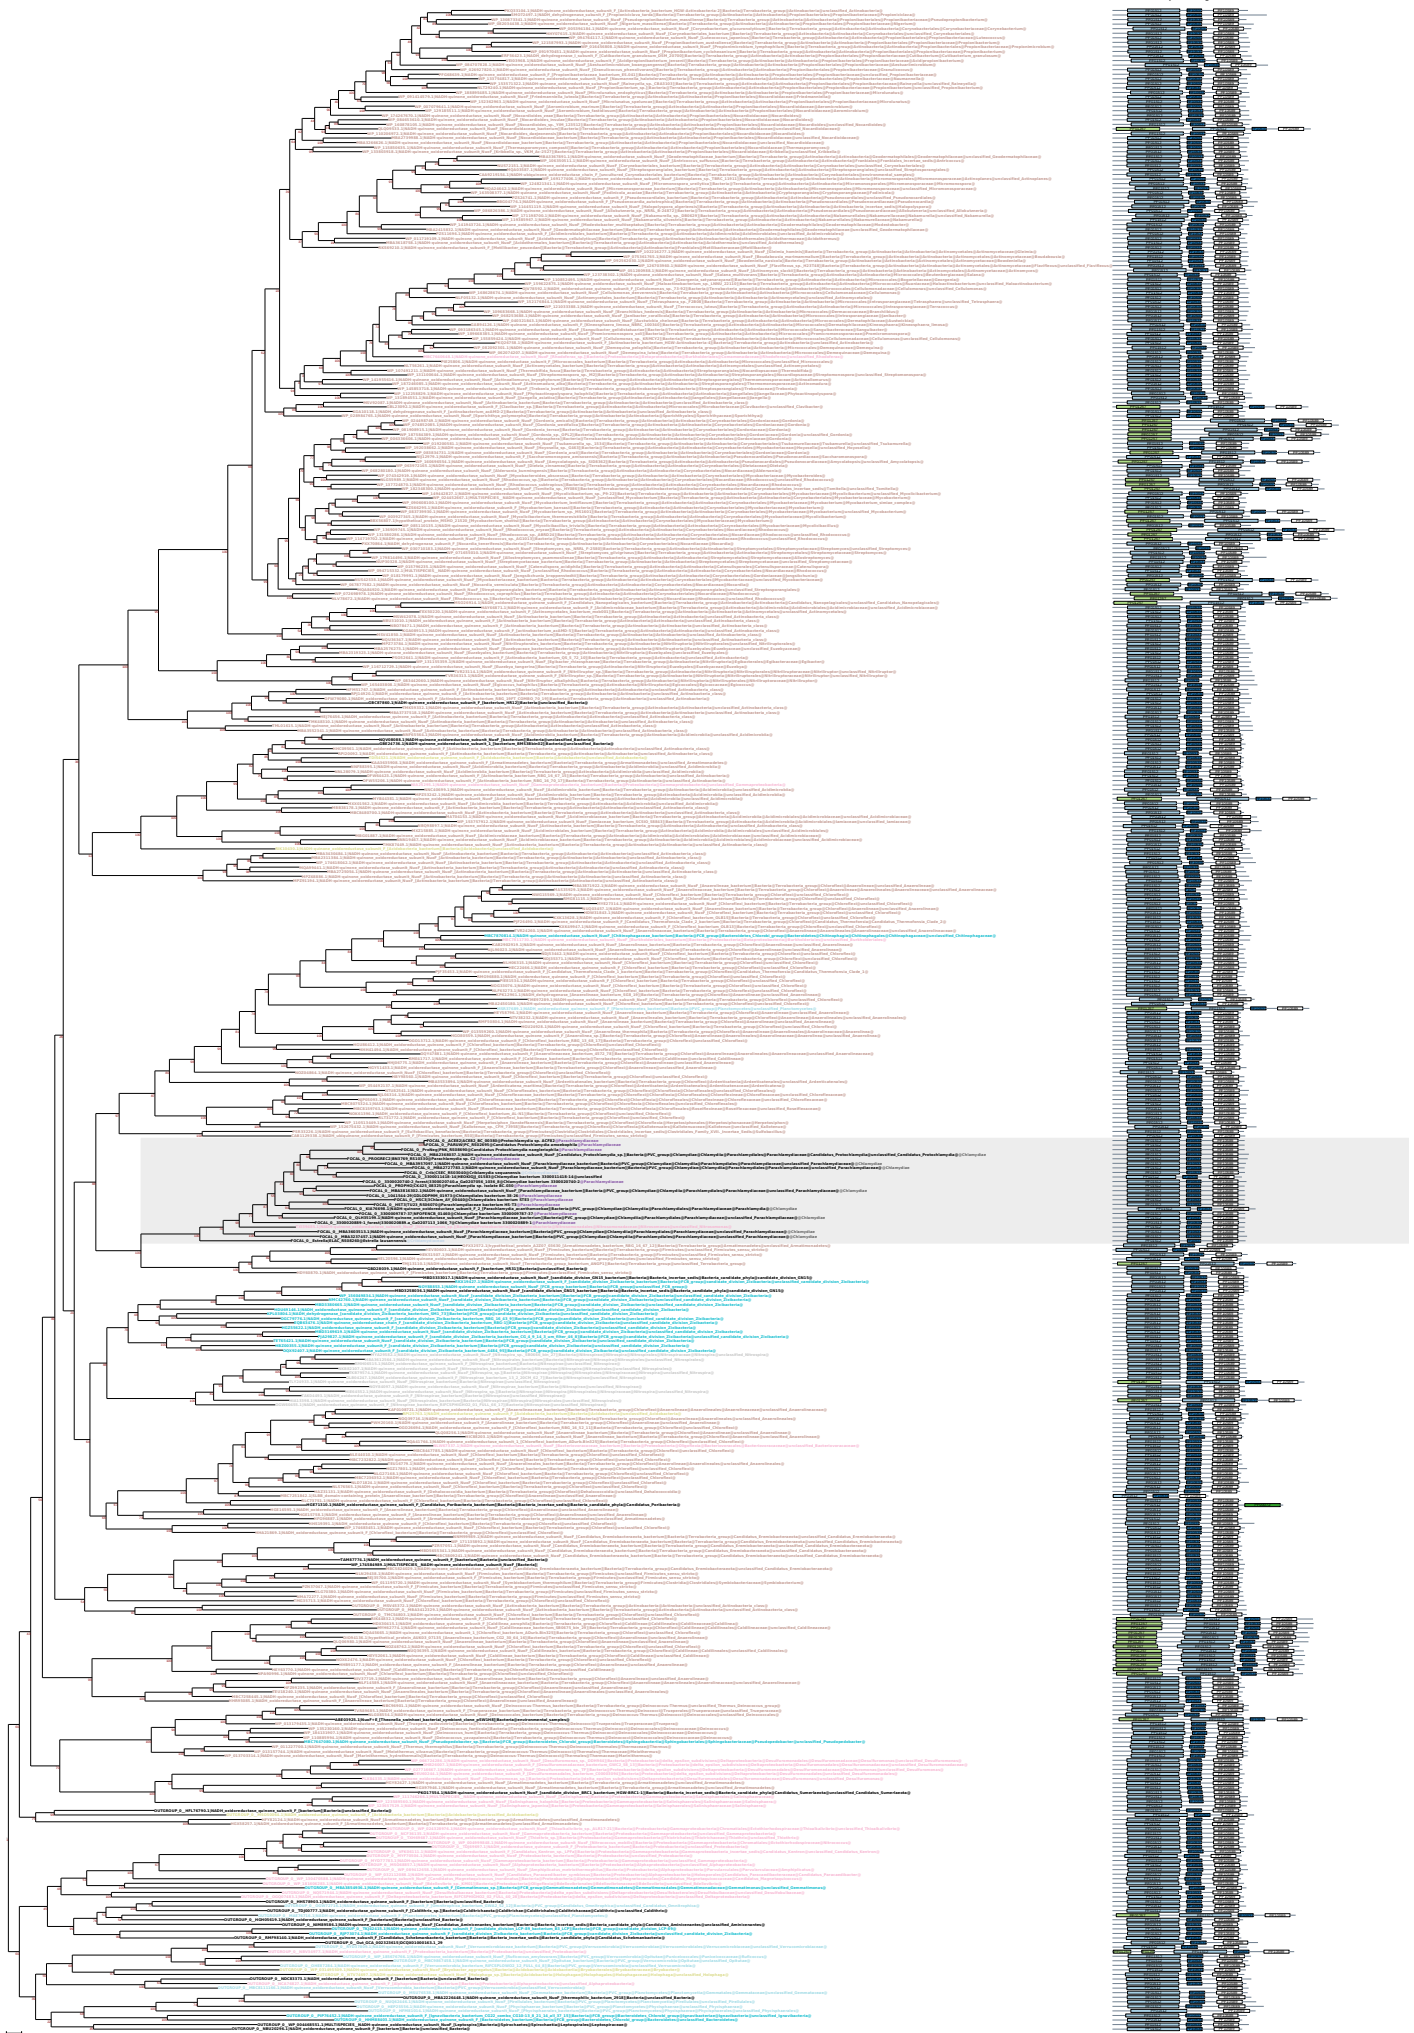

COG3383  
nuoG  
K00336  
NADH-quinone oxidoreductase subunit G

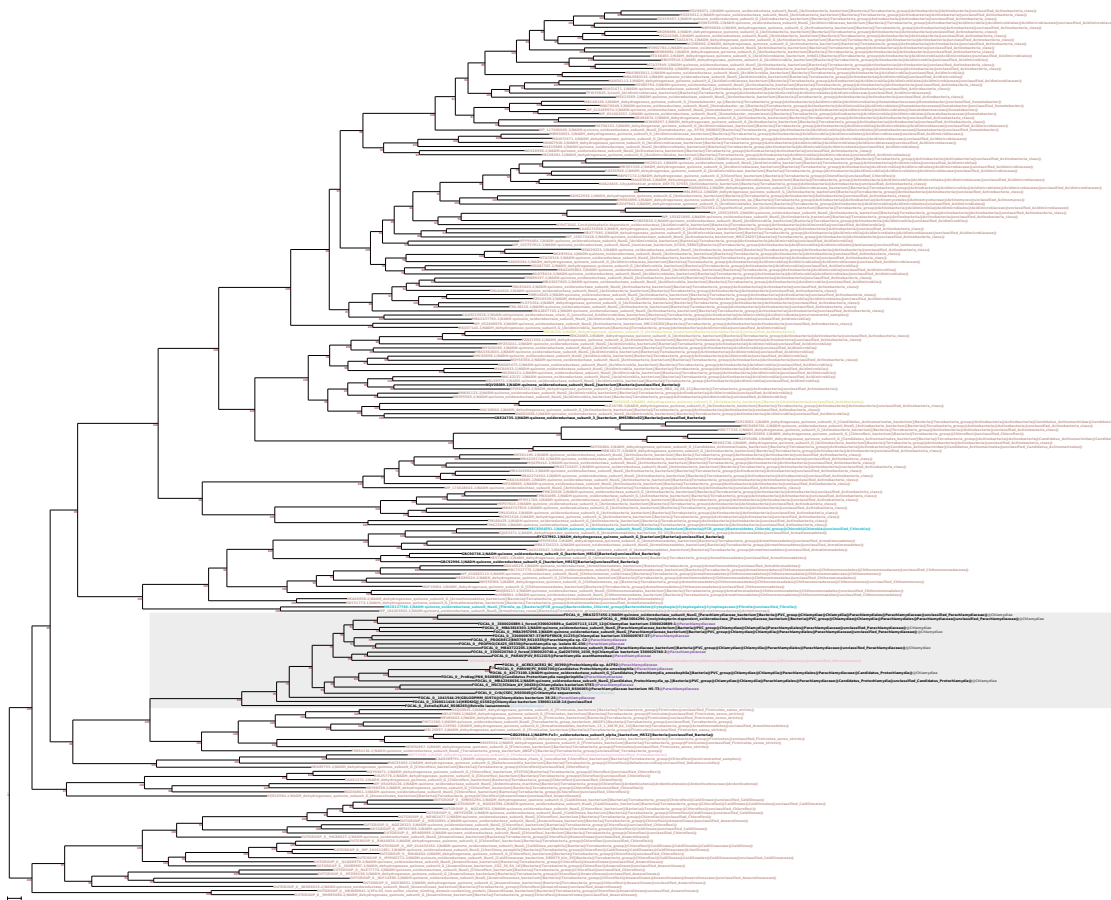

PF03284: Molybdopterin oxidoreductase  
PF10588: NADH-ubiquinone oxidoreductase-G iron-sulfur binding region  
PF04879: Molybdopterin oxidoreductase Fe-S4 domain  
PF13510: 2Fe-2S iron-sulfur cluster binding domain  
PF01560: Molybdopterin dinucleotide binding domain

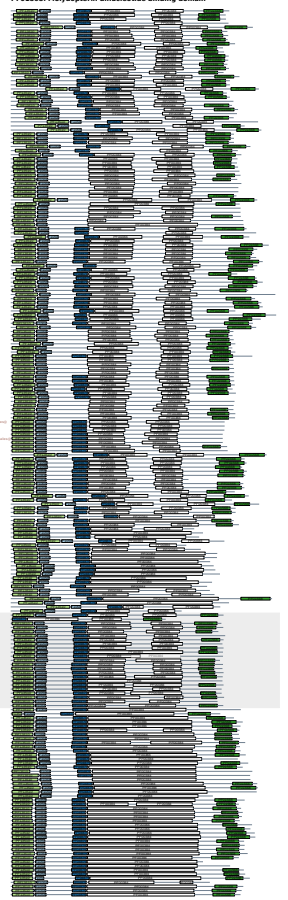



COG1005  
nuoH  
K00337  
NADH-quinone oxidoreductase subunit H

PF00146: NADH dehydrogenase  
PF00384: Molybdopterin oxidoreductase  
PF05745: Chlamydia 15 kDa cysteine-rich outer membrane protein (CRPA)

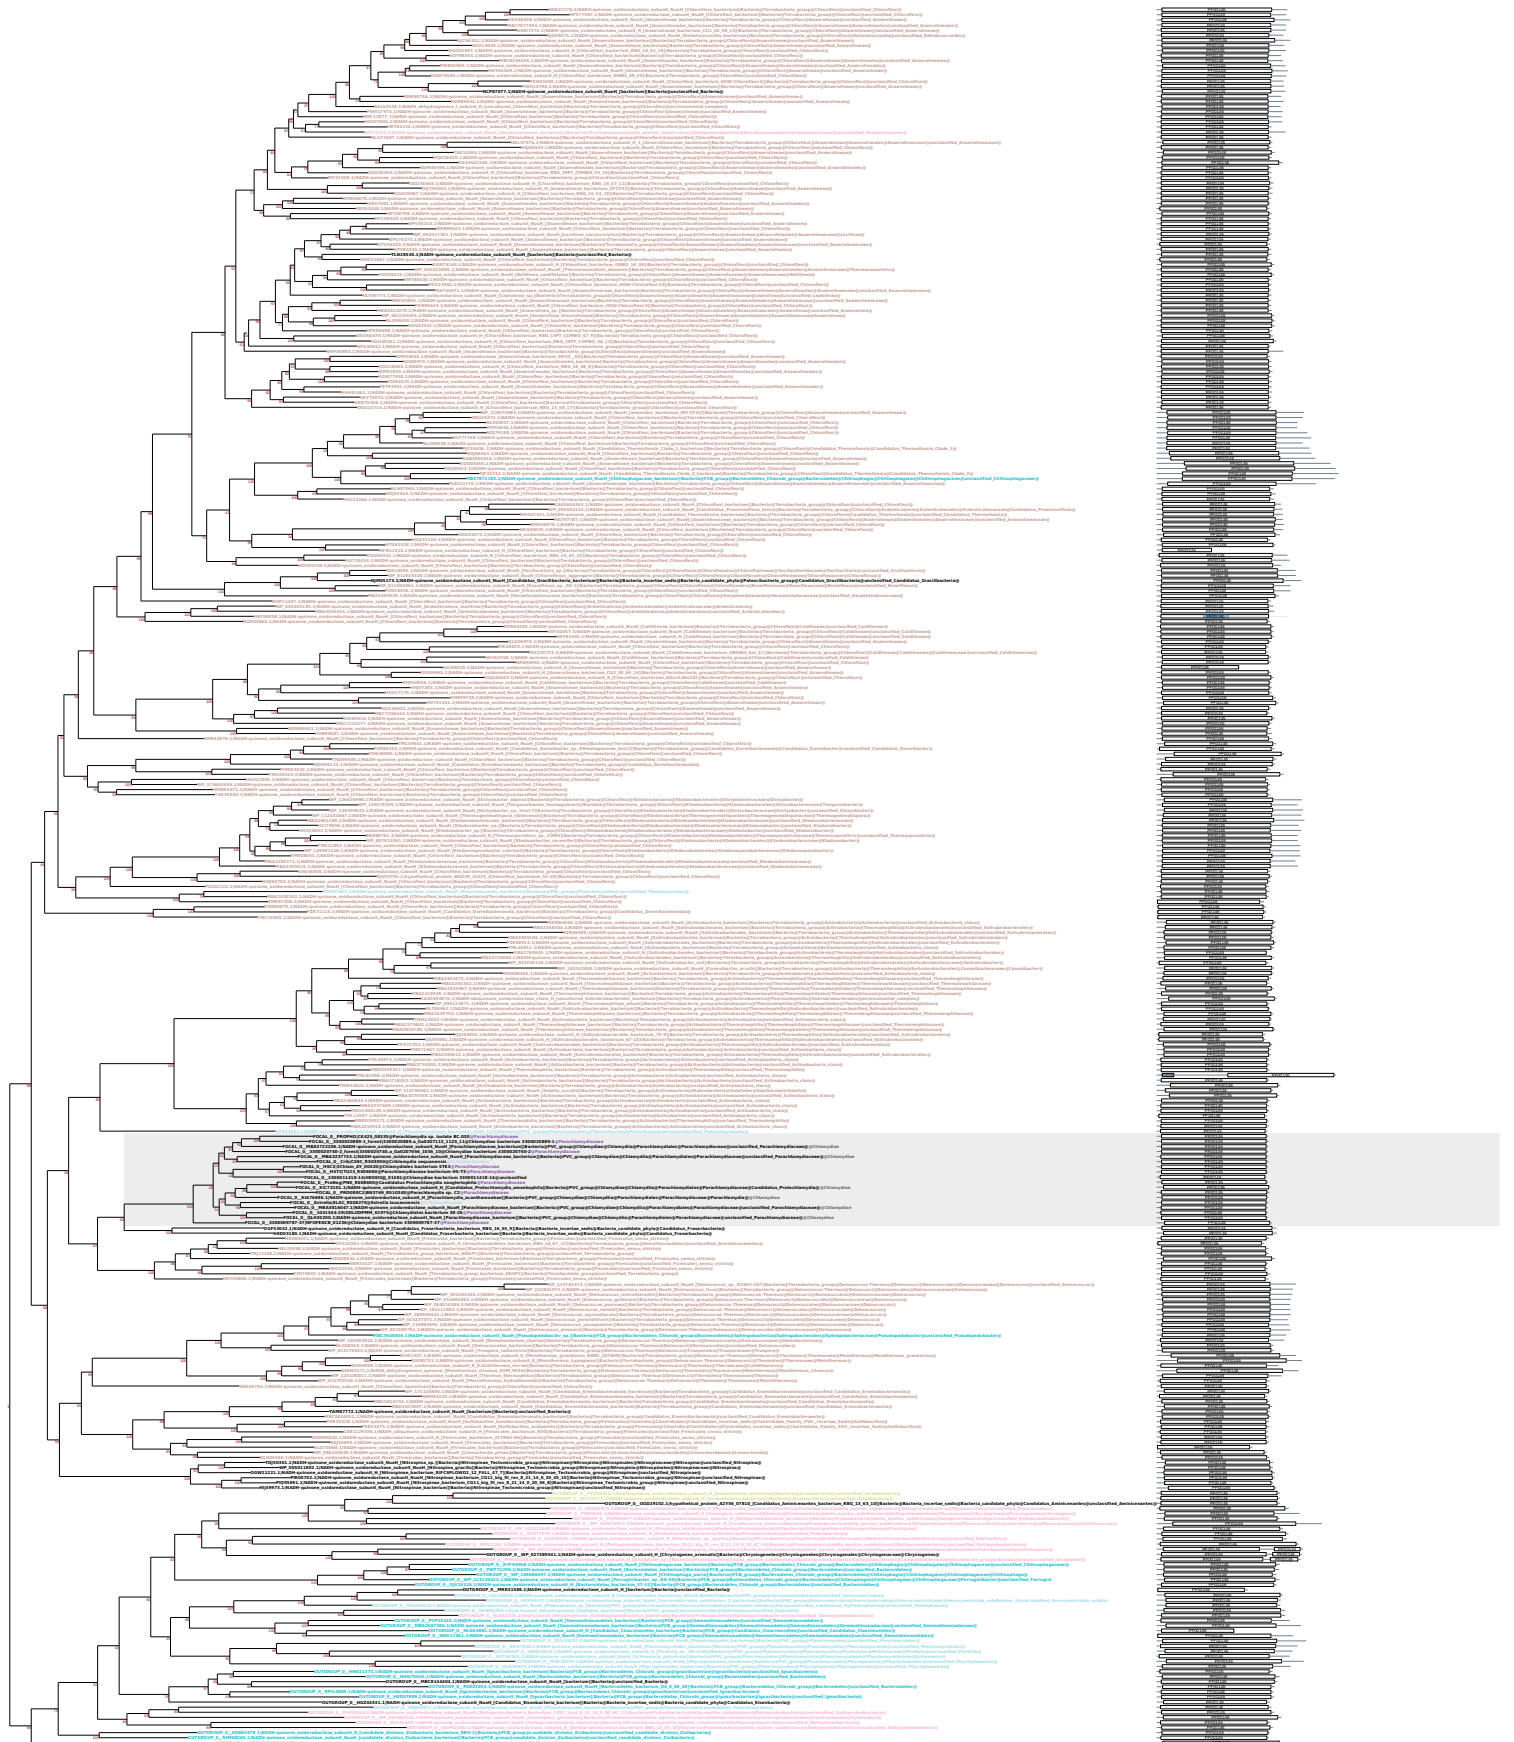

COG1143  
nuoL  
K00338  
NADH-quinone oxidoreductase subunit I

PF12838: 4Fe-4S dicluster domain  
PF00037: 4Fe-4S binding domain

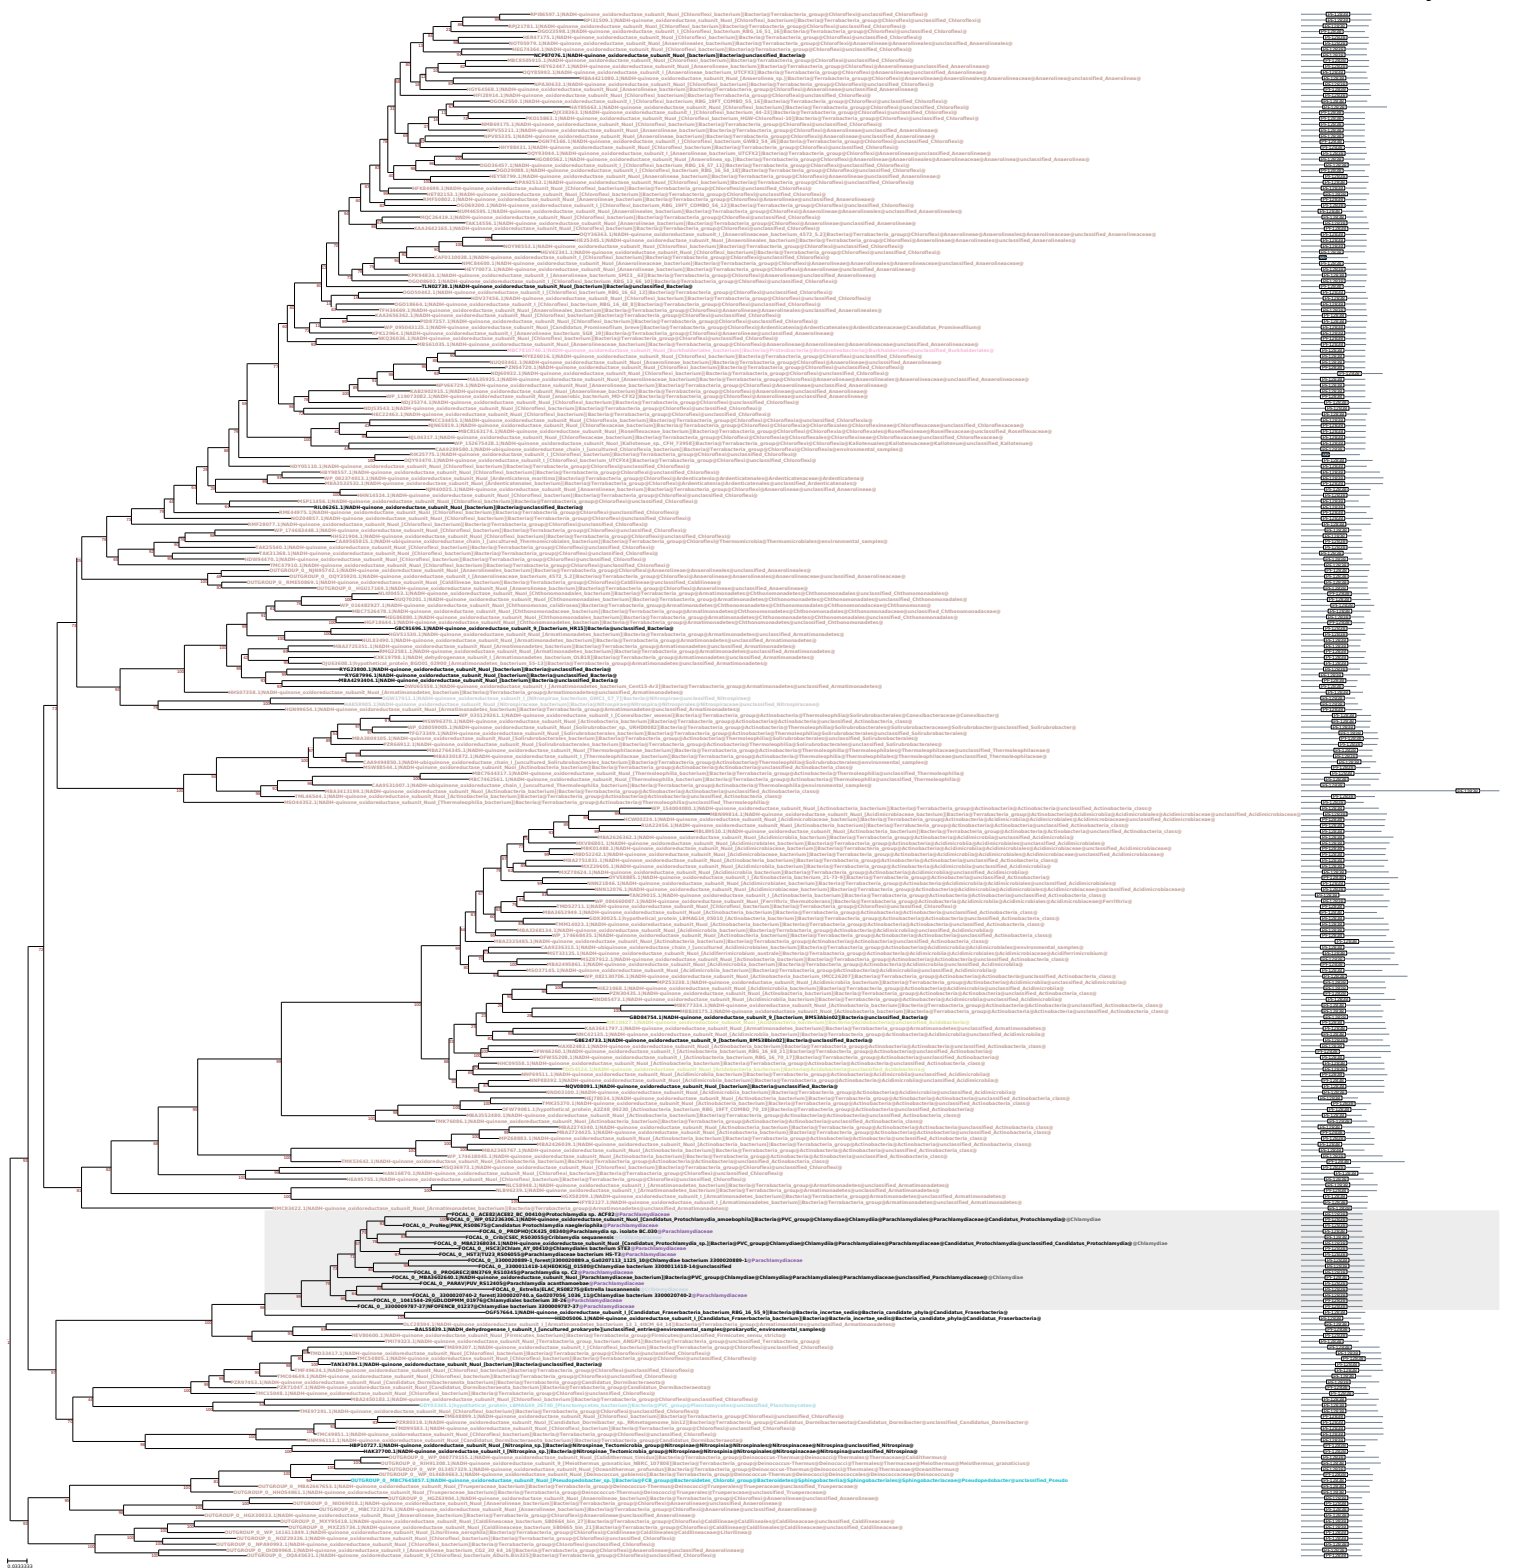

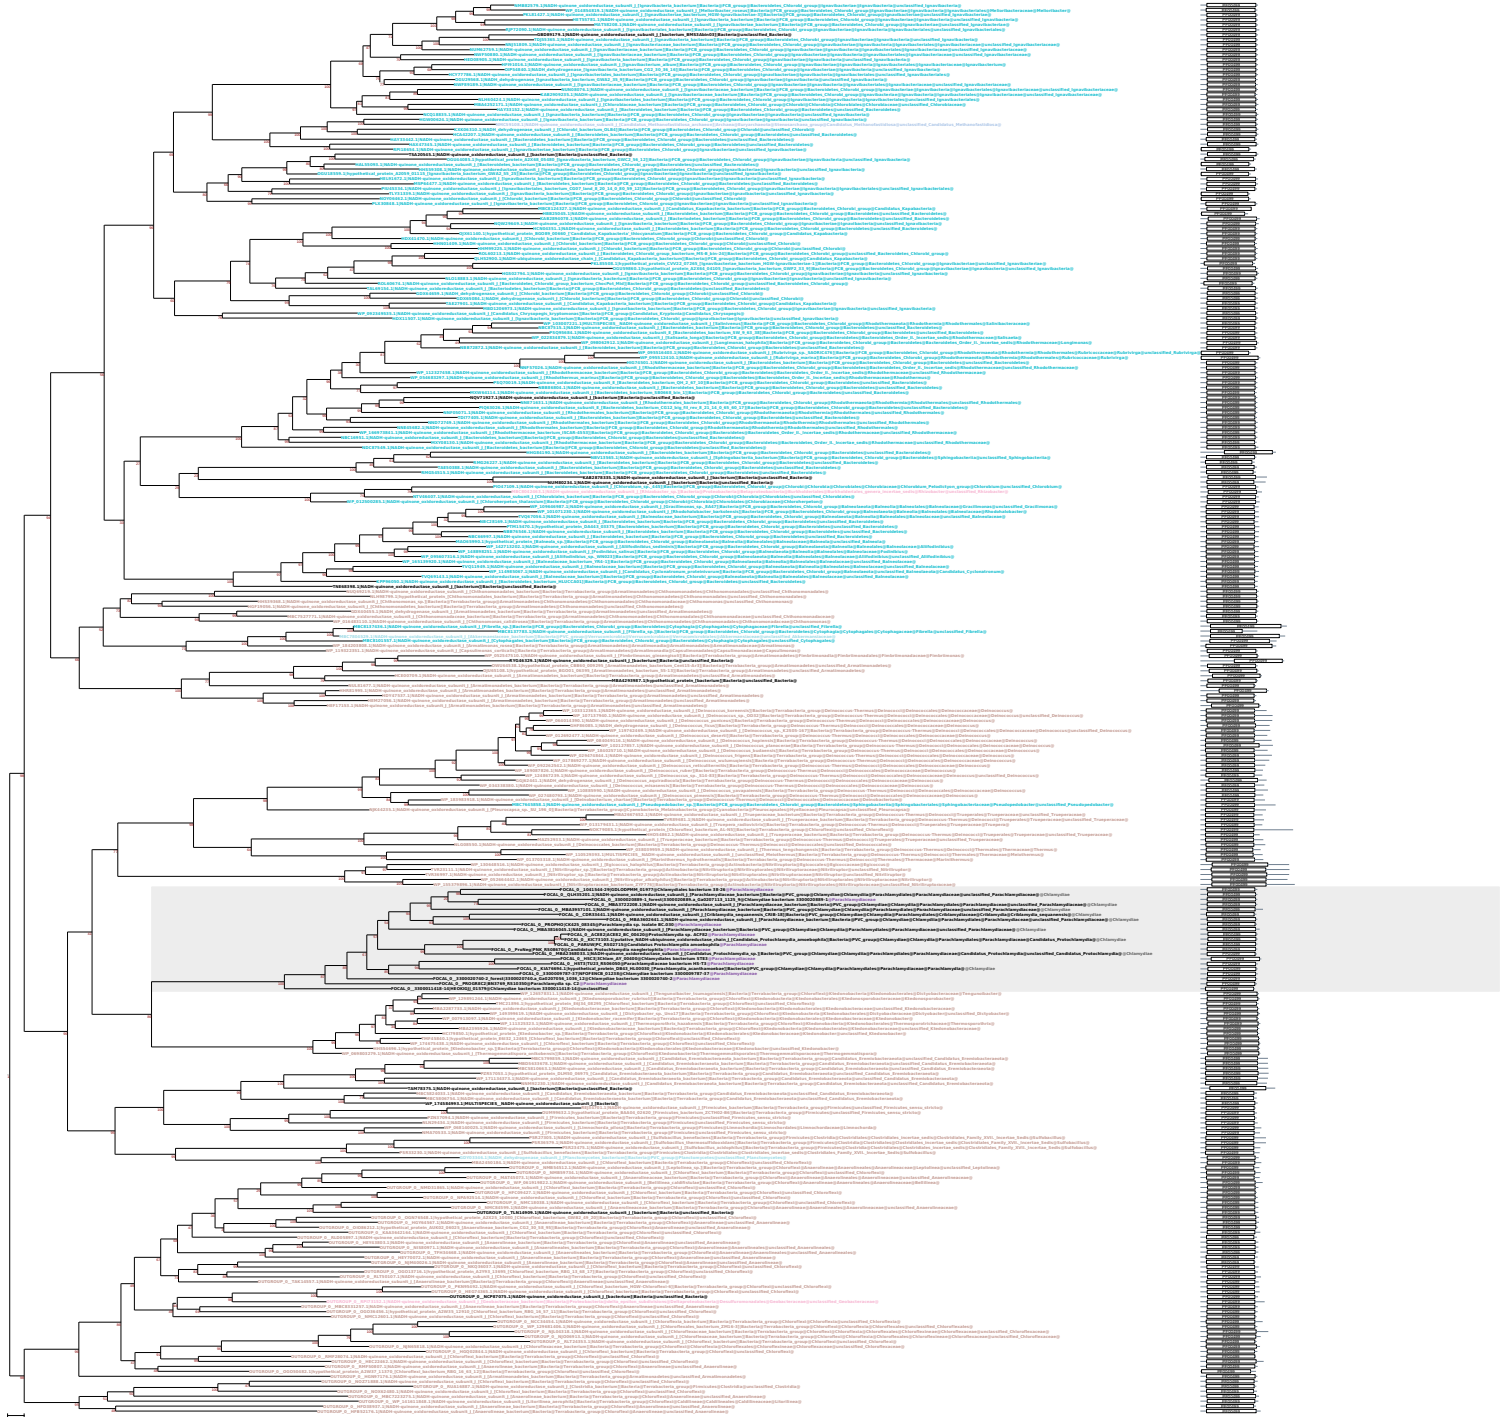

COG0713  
nuoK  
K00340  
NADH-quinone oxidoreductase subunit K

PF00420: NADH-ubiquinone/plastoquinone oxidoreductase chain 4L  
PF13385: Concanavalin A-like lectin/glucanases superfamily

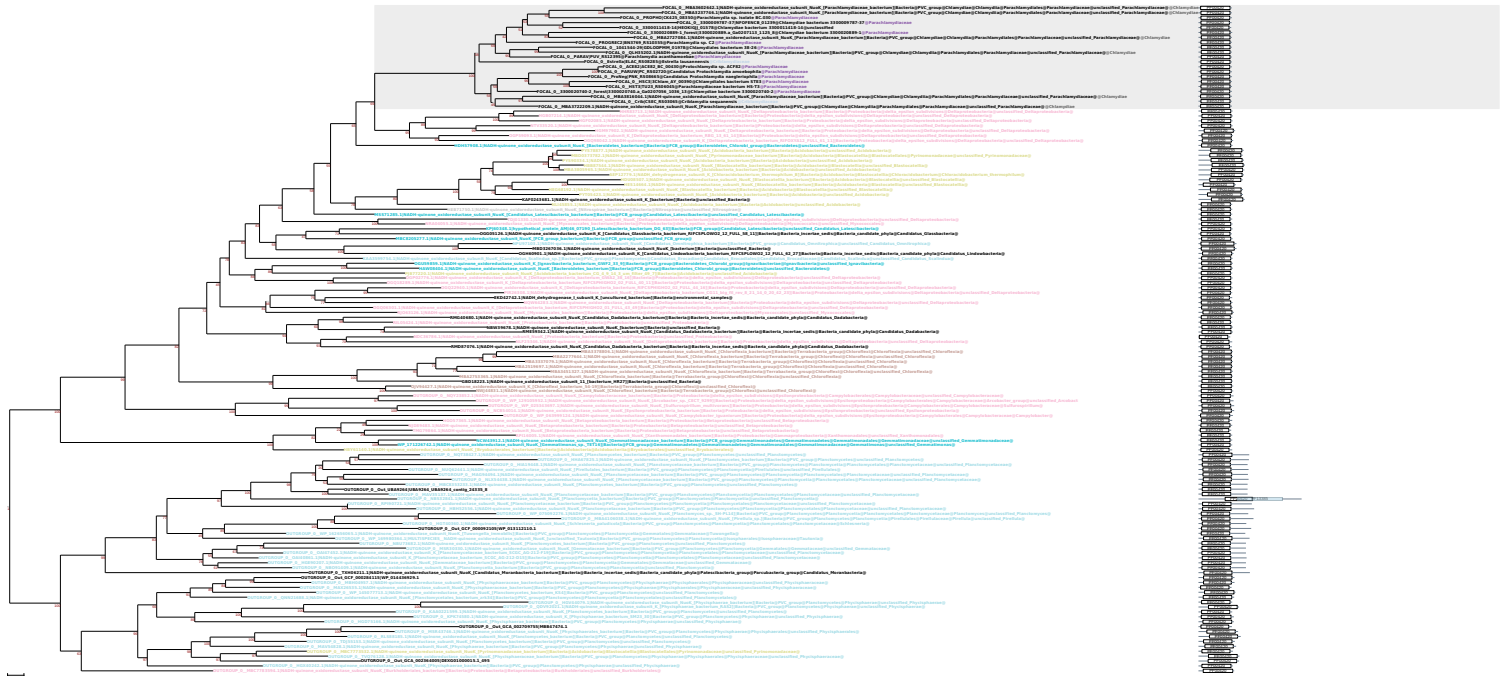



CG1009  
nucl.  
K00341  
NADH-quinone oxidoreductase subunit L

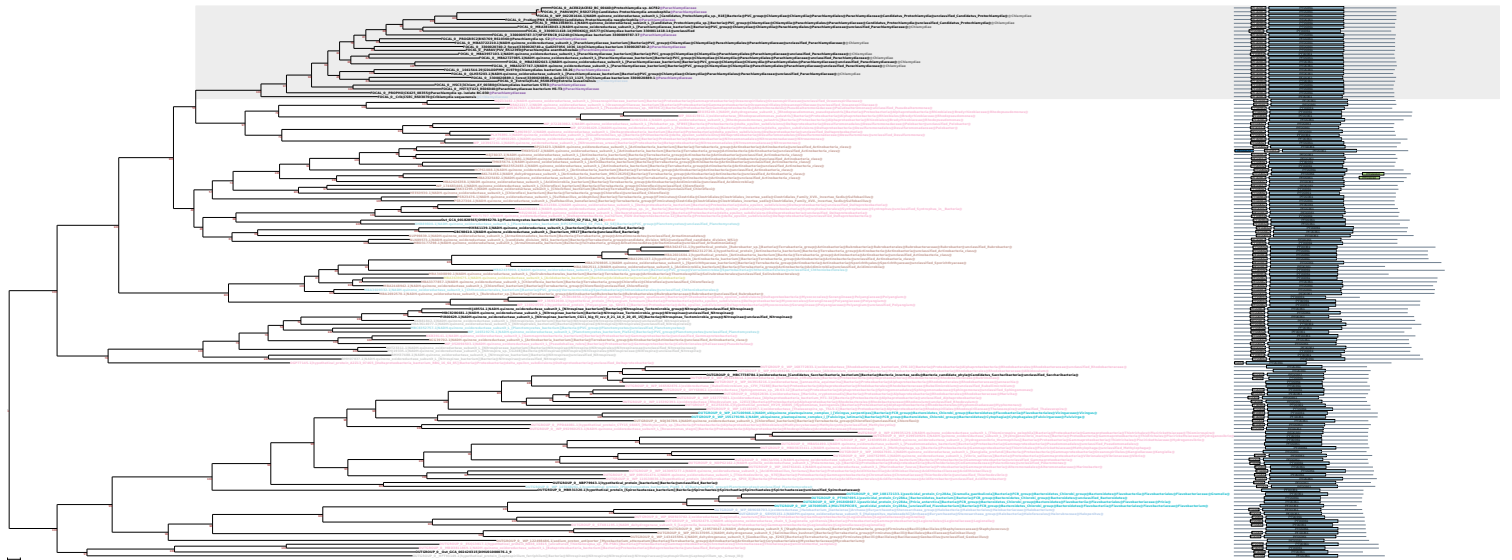

COG1009  
nuoM  
K02342  
NADH-quinone oxidoreductase subunit M

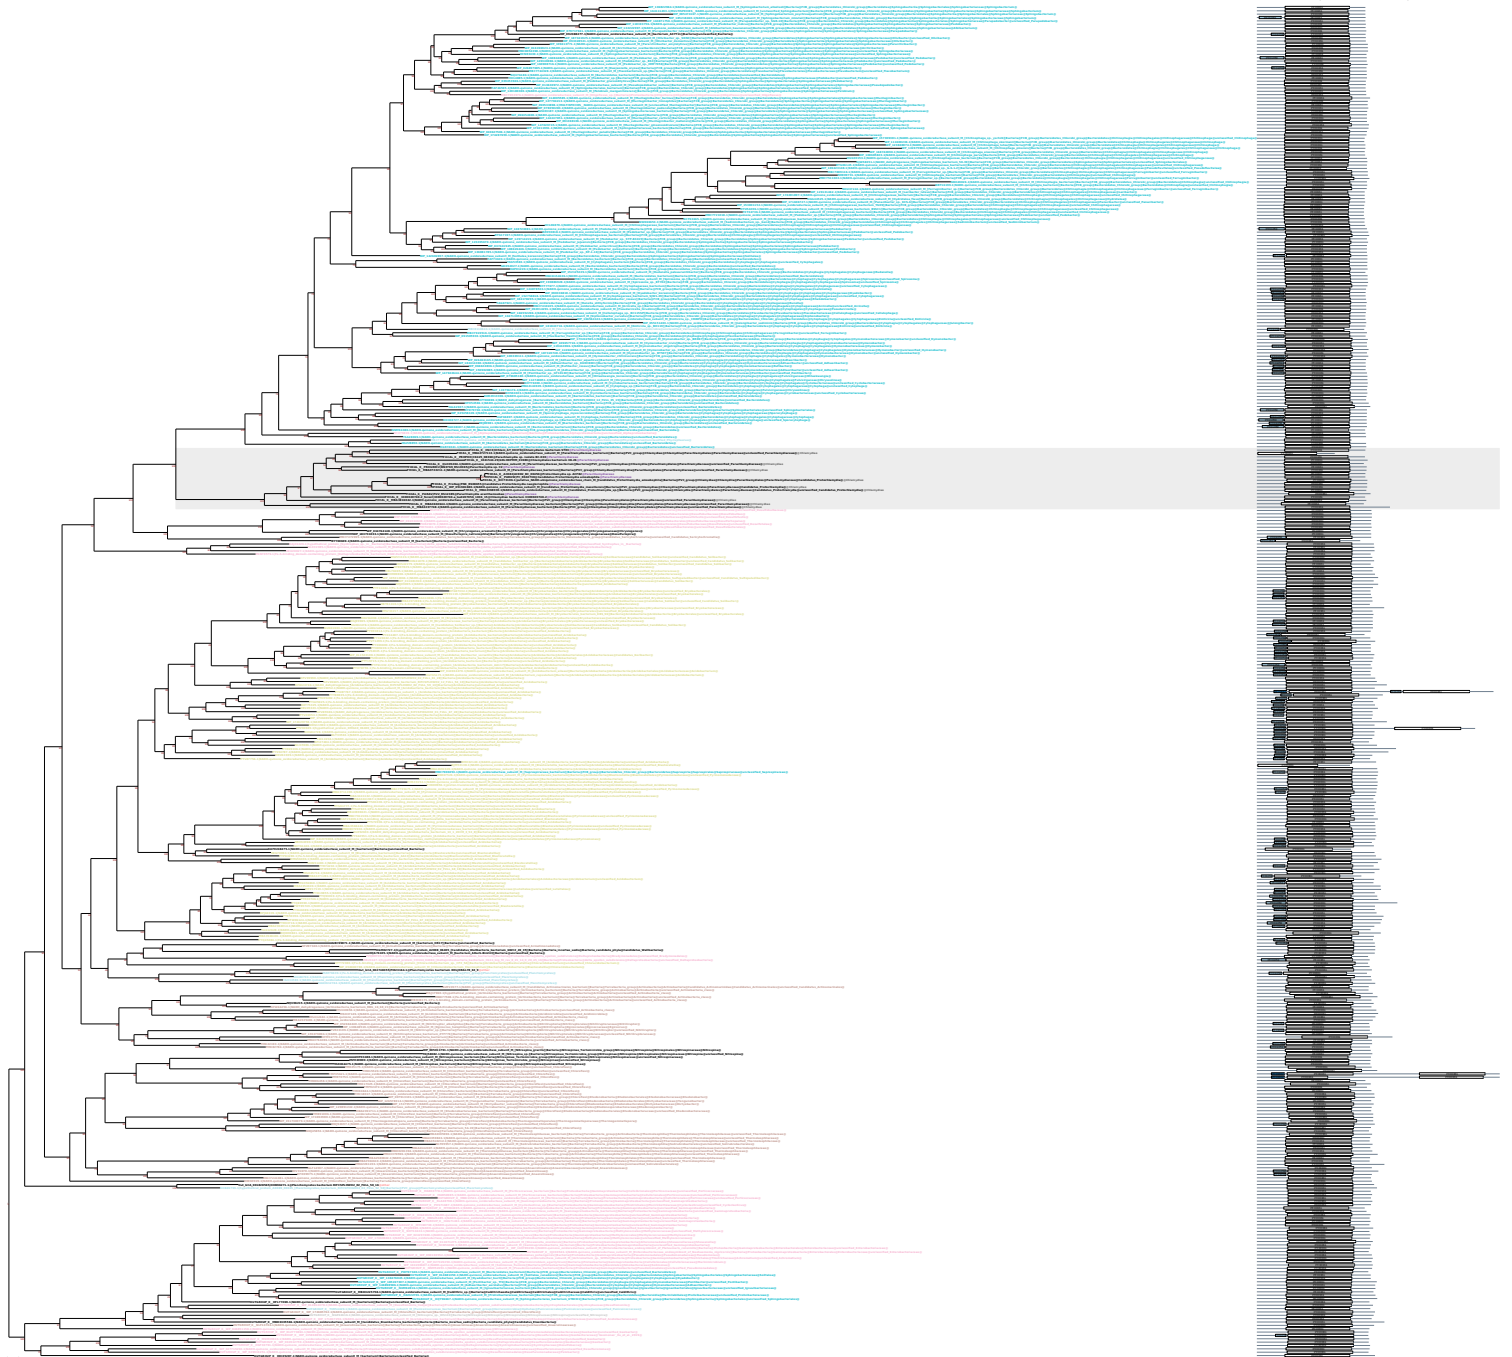

PF00261: Proton-conducting membrane transporter  
PF01029: NADH-ubiquinone oxidoreductase chain 4, amino terminal  
PF00262: NADH-ubiquinone oxidoreductase complex I, chain 2, N-terminal

COG1007  
nuoH  
K00343  
NADH-quinone oxidoreductase subunit N

PF00361: Proton-conducting membrane transporter

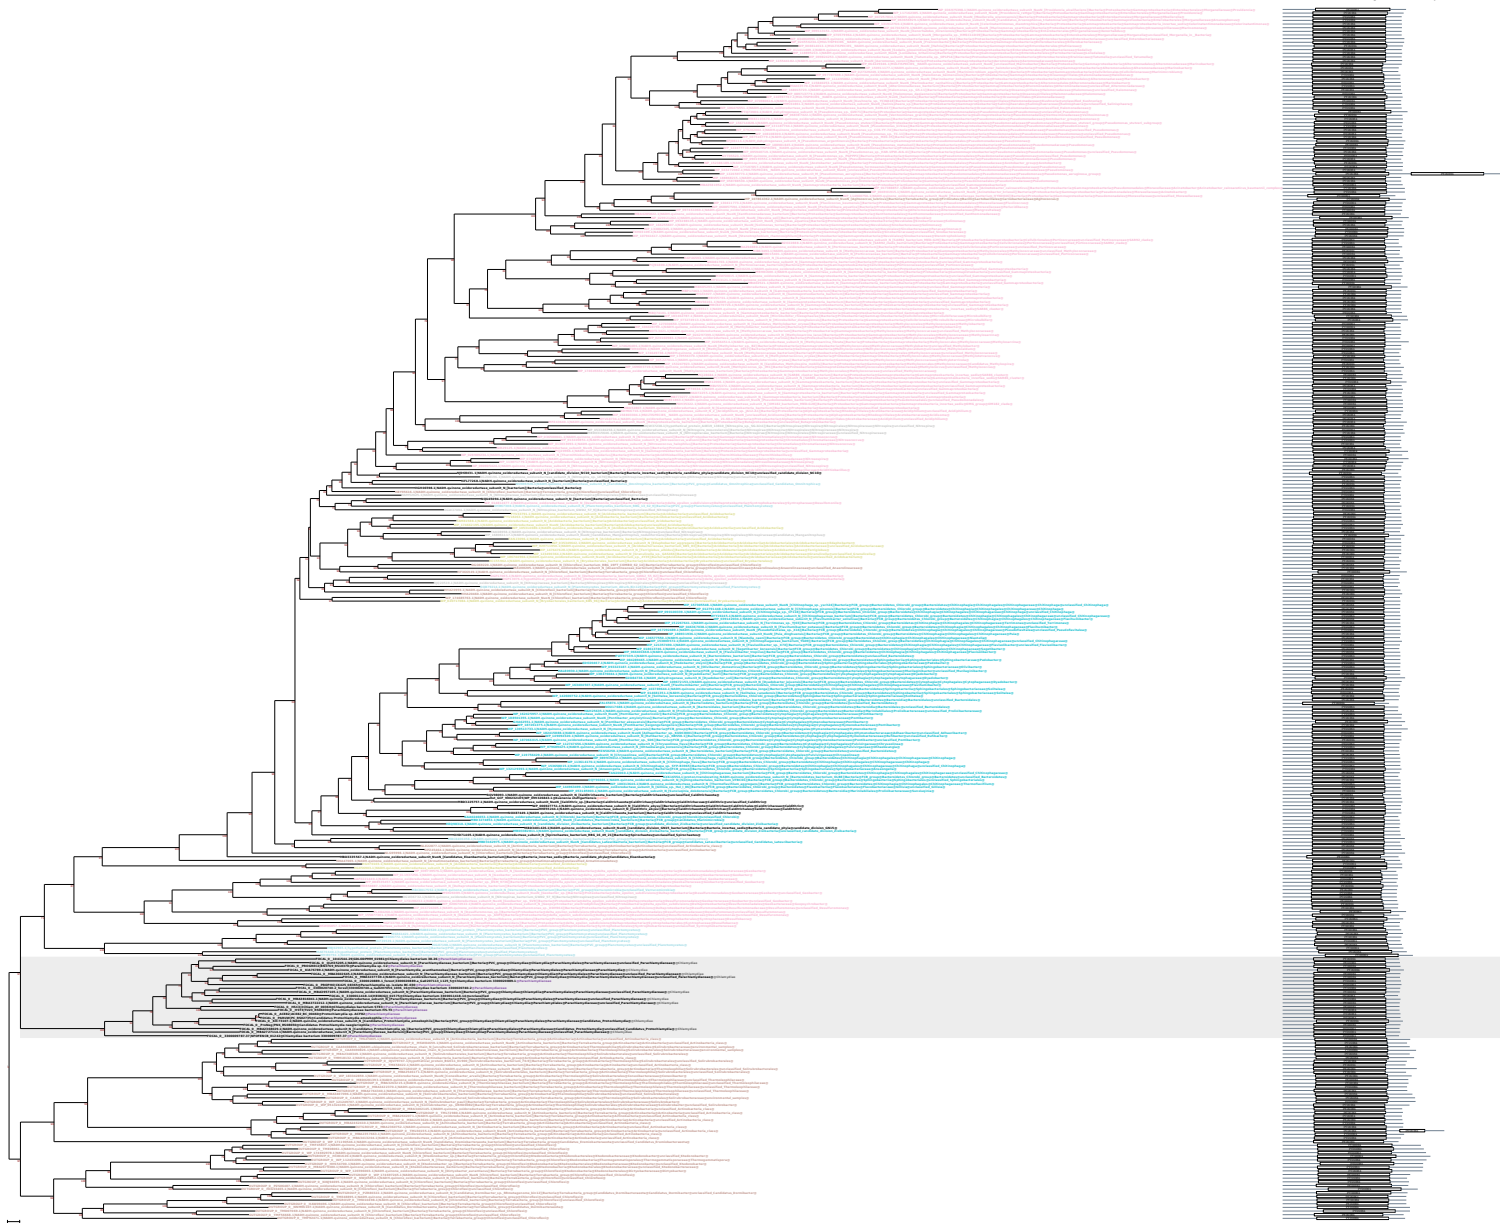

Supplement: 41564_2022_1284_MOESM5_ESM.pdf [file 41564_2022_1284_MOESM5_ESM.pdf]
